# Supplementary material for: The 2022 Outbreaks of African Swine Fever Virus Demonstrate the First Report of Genotype II in Ghana
Source: MDPI journal article supplement (doi:10.3390/v15081722), 2023-08-11
Supplement: s1 [file s1]

|                             |              |            |            |            |            |            |            |              |            |            |            |          |      |         |      |        |      |     |  |  |  |     |  |  |  |  |  |  |  |  |  |  |  |  |  |  |  |  |  |  |  |     |  |  |  |  |  |  |  |  |  |  |  |  |  |  |  |  |  |  |  |     |  |  |  |  |  |  |  |  |  |  |  |  |  |  |  |  |  |  |  |     |  |  |  |  |  |  |  |  |  |  |  |  |  |  |  |  |  |  |  |  |
|-----------------------------|--------------|------------|------------|------------|------------|------------|------------|--------------|------------|------------|------------|----------|------|---------|------|--------|------|-----|--|--|--|-----|--|--|--|--|--|--|--|--|--|--|--|--|--|--|--|--|--|--|--|-----|--|--|--|--|--|--|--|--|--|--|--|--|--|--|--|--|--|--|--|-----|--|--|--|--|--|--|--|--|--|--|--|--|--|--|--|--|--|--|--|-----|--|--|--|--|--|--|--|--|--|--|--|--|--|--|--|--|--|--|--|--|
|                             |              | 20         |            |            |            |            |            |              |            |            |            |          |      |         |      |        |      |     |  |  |  | 40  |  |  |  |  |  |  |  |  |  |  |  |  |  |  |  |  |  |  |  | 60  |  |  |  |  |  |  |  |  |  |  |  |  |  |  |  |  |  |  |  | 80  |  |  |  |  |  |  |  |  |  |  |  |  |  |  |  |  |  |  |  |     |  |  |  |  |  |  |  |  |  |  |  |  |  |  |  |  |  |  |  |  |
| Ghana2022-34,35,40&62_B602L | MAEFNIDELLKN | I          | LED        | PSTE       | ISEETLKQLY | QRTNPYKQFK | NDSRVAFC   | SFTNLREQYIRR | LIMTSFIGYV | FKALQEWMP  | SYSKPTH    | TTKT     | 90   |         |      |        |      |     |  |  |  |     |  |  |  |  |  |  |  |  |  |  |  |  |  |  |  |  |  |  |  |     |  |  |  |  |  |  |  |  |  |  |  |  |  |  |  |  |  |  |  |     |  |  |  |  |  |  |  |  |  |  |  |  |  |  |  |  |  |  |  |     |  |  |  |  |  |  |  |  |  |  |  |  |  |  |  |  |  |  |  |  |
| ASFV-G (Georgia-2007)       |              | V          |            |            |            |            |            |              |            |            |            |          | 90   |         |      |        |      |     |  |  |  |     |  |  |  |  |  |  |  |  |  |  |  |  |  |  |  |  |  |  |  |     |  |  |  |  |  |  |  |  |  |  |  |  |  |  |  |  |  |  |  |     |  |  |  |  |  |  |  |  |  |  |  |  |  |  |  |  |  |  |  |     |  |  |  |  |  |  |  |  |  |  |  |  |  |  |  |  |  |  |  |  |
| L60_ (Portugal-1960)        |              | V          |            |            |            |            |            |              |            |            |            |          | 90   |         |      |        |      |     |  |  |  |     |  |  |  |  |  |  |  |  |  |  |  |  |  |  |  |  |  |  |  |     |  |  |  |  |  |  |  |  |  |  |  |  |  |  |  |  |  |  |  |     |  |  |  |  |  |  |  |  |  |  |  |  |  |  |  |  |  |  |  |     |  |  |  |  |  |  |  |  |  |  |  |  |  |  |  |  |  |  |  |  |
| BA71V_ (Spain-1971)         |              | V          |            |            |            |            |            |              |            |            |            |          | 90   |         |      |        |      |     |  |  |  |     |  |  |  |  |  |  |  |  |  |  |  |  |  |  |  |  |  |  |  |     |  |  |  |  |  |  |  |  |  |  |  |  |  |  |  |  |  |  |  |     |  |  |  |  |  |  |  |  |  |  |  |  |  |  |  |  |  |  |  |     |  |  |  |  |  |  |  |  |  |  |  |  |  |  |  |  |  |  |  |  |
| OURT_88/3_ (Portugal-1988)  |              | V          |            |            |            |            |            |              |            |            |            |          | 90   |         |      |        |      |     |  |  |  |     |  |  |  |  |  |  |  |  |  |  |  |  |  |  |  |  |  |  |  |     |  |  |  |  |  |  |  |  |  |  |  |  |  |  |  |  |  |  |  |     |  |  |  |  |  |  |  |  |  |  |  |  |  |  |  |  |  |  |  |     |  |  |  |  |  |  |  |  |  |  |  |  |  |  |  |  |  |  |  |  |
| NHV_ (Portugal-1968)        |              | V          |            |            |            |            |            |              |            |            |            |          | 90   |         |      |        |      |     |  |  |  |     |  |  |  |  |  |  |  |  |  |  |  |  |  |  |  |  |  |  |  |     |  |  |  |  |  |  |  |  |  |  |  |  |  |  |  |  |  |  |  |     |  |  |  |  |  |  |  |  |  |  |  |  |  |  |  |  |  |  |  |     |  |  |  |  |  |  |  |  |  |  |  |  |  |  |  |  |  |  |  |  |
| Benin_97/1_ (Benin-1997)    |              | V          |            |            |            |            |            |              |            |            |            |          | 90   |         |      |        |      |     |  |  |  |     |  |  |  |  |  |  |  |  |  |  |  |  |  |  |  |  |  |  |  |     |  |  |  |  |  |  |  |  |  |  |  |  |  |  |  |  |  |  |  |     |  |  |  |  |  |  |  |  |  |  |  |  |  |  |  |  |  |  |  |     |  |  |  |  |  |  |  |  |  |  |  |  |  |  |  |  |  |  |  |  |
| Conservation                |              |            |            |            |            |            |            |              |            |            |            |          |      |         |      |        |      |     |  |  |  |     |  |  |  |  |  |  |  |  |  |  |  |  |  |  |  |  |  |  |  |     |  |  |  |  |  |  |  |  |  |  |  |  |  |  |  |  |  |  |  |     |  |  |  |  |  |  |  |  |  |  |  |  |  |  |  |  |  |  |  |     |  |  |  |  |  |  |  |  |  |  |  |  |  |  |  |  |  |  |  |  |
|                             |              | 100        |            |            |            |            |            |              |            |            |            |          |      |         |      |        |      |     |  |  |  | 120 |  |  |  |  |  |  |  |  |  |  |  |  |  |  |  |  |  |  |  | 140 |  |  |  |  |  |  |  |  |  |  |  |  |  |  |  |  |  |  |  | 160 |  |  |  |  |  |  |  |  |  |  |  |  |  |  |  |  |  |  |  | 180 |  |  |  |  |  |  |  |  |  |  |  |  |  |  |  |  |  |  |  |  |
| Ghana2022-34,35,40&62_B602L | LLSELITLVD   | TLKQETNDVP | SESVVNTILS | IAD        | SCKTQTQ    | KSKEAKTTID | SFLREHFVFD | PNLHAQSAYT   | CA         |            |            |          | 162  |         |      |        |      |     |  |  |  |     |  |  |  |  |  |  |  |  |  |  |  |  |  |  |  |  |  |  |  |     |  |  |  |  |  |  |  |  |  |  |  |  |  |  |  |  |  |  |  |     |  |  |  |  |  |  |  |  |  |  |  |  |  |  |  |  |  |  |  |     |  |  |  |  |  |  |  |  |  |  |  |  |  |  |  |  |  |  |  |  |
| ASFV-G (Georgia-2007)       |              |            |            |            |            |            |            |              |            |            |            |          | 162  |         |      |        |      |     |  |  |  |     |  |  |  |  |  |  |  |  |  |  |  |  |  |  |  |  |  |  |  |     |  |  |  |  |  |  |  |  |  |  |  |  |  |  |  |  |  |  |  |     |  |  |  |  |  |  |  |  |  |  |  |  |  |  |  |  |  |  |  |     |  |  |  |  |  |  |  |  |  |  |  |  |  |  |  |  |  |  |  |  |
| L60_ (Portugal-1960)        |              |            |            |            |            |            |            |              |            |            |            |          | 180  |         |      |        |      |     |  |  |  |     |  |  |  |  |  |  |  |  |  |  |  |  |  |  |  |  |  |  |  |     |  |  |  |  |  |  |  |  |  |  |  |  |  |  |  |  |  |  |  |     |  |  |  |  |  |  |  |  |  |  |  |  |  |  |  |  |  |  |  |     |  |  |  |  |  |  |  |  |  |  |  |  |  |  |  |  |  |  |  |  |
| BA71V_ (Spain-1971)         |              |            |            |            |            |            |            |              |            |            |            |          | 180  |         |      |        |      |     |  |  |  |     |  |  |  |  |  |  |  |  |  |  |  |  |  |  |  |  |  |  |  |     |  |  |  |  |  |  |  |  |  |  |  |  |  |  |  |  |  |  |  |     |  |  |  |  |  |  |  |  |  |  |  |  |  |  |  |  |  |  |  |     |  |  |  |  |  |  |  |  |  |  |  |  |  |  |  |  |  |  |  |  |
| OURT_88/3_ (Portugal-1988)  |              |            |            |            |            |            |            |              |            |            |            |          | 180  |         |      |        |      |     |  |  |  |     |  |  |  |  |  |  |  |  |  |  |  |  |  |  |  |  |  |  |  |     |  |  |  |  |  |  |  |  |  |  |  |  |  |  |  |  |  |  |  |     |  |  |  |  |  |  |  |  |  |  |  |  |  |  |  |  |  |  |  |     |  |  |  |  |  |  |  |  |  |  |  |  |  |  |  |  |  |  |  |  |
| NHV_ (Portugal-1968)        |              |            |            |            |            |            |            |              |            |            |            |          | 180  |         |      |        |      |     |  |  |  |     |  |  |  |  |  |  |  |  |  |  |  |  |  |  |  |  |  |  |  |     |  |  |  |  |  |  |  |  |  |  |  |  |  |  |  |  |  |  |  |     |  |  |  |  |  |  |  |  |  |  |  |  |  |  |  |  |  |  |  |     |  |  |  |  |  |  |  |  |  |  |  |  |  |  |  |  |  |  |  |  |
| Benin_97/1_ (Benin-1997)    |              |            |            |            |            |            |            |              |            |            |            |          | 180  |         |      |        |      |     |  |  |  |     |  |  |  |  |  |  |  |  |  |  |  |  |  |  |  |  |  |  |  |     |  |  |  |  |  |  |  |  |  |  |  |  |  |  |  |  |  |  |  |     |  |  |  |  |  |  |  |  |  |  |  |  |  |  |  |  |  |  |  |     |  |  |  |  |  |  |  |  |  |  |  |  |  |  |  |  |  |  |  |  |
| Conservation                |              |            |            |            |            |            |            |              |            |            |            |          |      |         |      |        |      |     |  |  |  |     |  |  |  |  |  |  |  |  |  |  |  |  |  |  |  |  |  |  |  |     |  |  |  |  |  |  |  |  |  |  |  |  |  |  |  |  |  |  |  |     |  |  |  |  |  |  |  |  |  |  |  |  |  |  |  |  |  |  |  |     |  |  |  |  |  |  |  |  |  |  |  |  |  |  |  |  |  |  |  |  |
|                             |              | 200        |            |            |            |            |            |              |            |            |            |          |      |         |      |        |      |     |  |  |  | 220 |  |  |  |  |  |  |  |  |  |  |  |  |  |  |  |  |  |  |  | 240 |  |  |  |  |  |  |  |  |  |  |  |  |  |  |  |  |  |  |  | 260 |  |  |  |  |  |  |  |  |  |  |  |  |  |  |  |  |  |  |  |     |  |  |  |  |  |  |  |  |  |  |  |  |  |  |  |  |  |  |  |  |
| Ghana2022-34,35,40&62_B602L |              |            |            |            |            |            |            |              |            |            |            |          | 162  |         |      |        |      |     |  |  |  |     |  |  |  |  |  |  |  |  |  |  |  |  |  |  |  |  |  |  |  |     |  |  |  |  |  |  |  |  |  |  |  |  |  |  |  |  |  |  |  |     |  |  |  |  |  |  |  |  |  |  |  |  |  |  |  |  |  |  |  |     |  |  |  |  |  |  |  |  |  |  |  |  |  |  |  |  |  |  |  |  |
| ASFV-G (Georgia-2007)       |              |            |            |            |            |            |            |              |            |            |            |          | 162  |         |      |        |      |     |  |  |  |     |  |  |  |  |  |  |  |  |  |  |  |  |  |  |  |  |  |  |  |     |  |  |  |  |  |  |  |  |  |  |  |  |  |  |  |  |  |  |  |     |  |  |  |  |  |  |  |  |  |  |  |  |  |  |  |  |  |  |  |     |  |  |  |  |  |  |  |  |  |  |  |  |  |  |  |  |  |  |  |  |
| L60_ (Portugal-1960)        | CASTCAST     |            |            |            |            |            |            |              |            |            |            |          | 188  |         |      |        |      |     |  |  |  |     |  |  |  |  |  |  |  |  |  |  |  |  |  |  |  |  |  |  |  |     |  |  |  |  |  |  |  |  |  |  |  |  |  |  |  |  |  |  |  |     |  |  |  |  |  |  |  |  |  |  |  |  |  |  |  |  |  |  |  |     |  |  |  |  |  |  |  |  |  |  |  |  |  |  |  |  |  |  |  |  |
| BA71V_ (Spain-1971)         | CASTCASTCA   | STCASTCAST |            |            |            |            |            |              |            |            |            |          | 200  |         |      |        |      |     |  |  |  |     |  |  |  |  |  |  |  |  |  |  |  |  |  |  |  |  |  |  |  |     |  |  |  |  |  |  |  |  |  |  |  |  |  |  |  |  |  |  |  |     |  |  |  |  |  |  |  |  |  |  |  |  |  |  |  |  |  |  |  |     |  |  |  |  |  |  |  |  |  |  |  |  |  |  |  |  |  |  |  |  |
| OURT_88/3_ (Portugal-1988)  | CASTCASTCA   | STCASTCAST | CASTCASTCA | STCASTCAST | CASTGASTGA | STCADTNVD  | CASTCADTNV | DTCASTCAST   | CASTCASTCA |            |            |          | 270  |         |      |        |      |     |  |  |  |     |  |  |  |  |  |  |  |  |  |  |  |  |  |  |  |  |  |  |  |     |  |  |  |  |  |  |  |  |  |  |  |  |  |  |  |  |  |  |  |     |  |  |  |  |  |  |  |  |  |  |  |  |  |  |  |  |  |  |  |     |  |  |  |  |  |  |  |  |  |  |  |  |  |  |  |  |  |  |  |  |
| NHV_ (Portugal-1968)        | CASTCASTCA   | STCASTCAST | CASTCASTCA | STCASTCAST | --GASTGA   | STCADTNVD  | CASTCADTNV | DTCASTCAST   | CASTCASTCA |            |            |          | 266  |         |      |        |      |     |  |  |  |     |  |  |  |  |  |  |  |  |  |  |  |  |  |  |  |  |  |  |  |     |  |  |  |  |  |  |  |  |  |  |  |  |  |  |  |  |  |  |  |     |  |  |  |  |  |  |  |  |  |  |  |  |  |  |  |  |  |  |  |     |  |  |  |  |  |  |  |  |  |  |  |  |  |  |  |  |  |  |  |  |
| Benin_97/1_ (Benin-1997)    | CASTCASTGA   | STCA       |            |            |            |            |            |              |            |            |            |          | 218  |         |      |        |      |     |  |  |  |     |  |  |  |  |  |  |  |  |  |  |  |  |  |  |  |  |  |  |  |     |  |  |  |  |  |  |  |  |  |  |  |  |  |  |  |  |  |  |  |     |  |  |  |  |  |  |  |  |  |  |  |  |  |  |  |  |  |  |  |     |  |  |  |  |  |  |  |  |  |  |  |  |  |  |  |  |  |  |  |  |
| Conservation                |              |            |            |            |            |            |            |              |            |            |            |          |      |         |      |        |      |     |  |  |  |     |  |  |  |  |  |  |  |  |  |  |  |  |  |  |  |  |  |  |  |     |  |  |  |  |  |  |  |  |  |  |  |  |  |  |  |  |  |  |  |     |  |  |  |  |  |  |  |  |  |  |  |  |  |  |  |  |  |  |  |     |  |  |  |  |  |  |  |  |  |  |  |  |  |  |  |  |  |  |  |  |
|                             |              | 280        |            |            |            |            |            |              |            |            |            |          |      |         |      |        |      |     |  |  |  | 300 |  |  |  |  |  |  |  |  |  |  |  |  |  |  |  |  |  |  |  | 320 |  |  |  |  |  |  |  |  |  |  |  |  |  |  |  |  |  |  |  | 340 |  |  |  |  |  |  |  |  |  |  |  |  |  |  |  |  |  |  |  | 360 |  |  |  |  |  |  |  |  |  |  |  |  |  |  |  |  |  |  |  |  |
| Ghana2022-34,35,40&62_B602L |              |            |            |            |            |            |            |              |            |            |            |          | 204  |         |      |        |      |     |  |  |  |     |  |  |  |  |  |  |  |  |  |  |  |  |  |  |  |  |  |  |  |     |  |  |  |  |  |  |  |  |  |  |  |  |  |  |  |  |  |  |  |     |  |  |  |  |  |  |  |  |  |  |  |  |  |  |  |  |  |  |  |     |  |  |  |  |  |  |  |  |  |  |  |  |  |  |  |  |  |  |  |  |
| ASFV-G (Georgia-2007)       |              |            |            |            |            |            |            |              |            |            |            |          | 204  |         |      |        |      |     |  |  |  |     |  |  |  |  |  |  |  |  |  |  |  |  |  |  |  |  |  |  |  |     |  |  |  |  |  |  |  |  |  |  |  |  |  |  |  |  |  |  |  |     |  |  |  |  |  |  |  |  |  |  |  |  |  |  |  |  |  |  |  |     |  |  |  |  |  |  |  |  |  |  |  |  |  |  |  |  |  |  |  |  |
| L60_ (Portugal-1960)        | --GASTCADT   | NVDTCASTCA | DTNVDTCAST | CA         |            |            |            |              |            |            |            |          | 264  |         |      |        |      |     |  |  |  |     |  |  |  |  |  |  |  |  |  |  |  |  |  |  |  |  |  |  |  |     |  |  |  |  |  |  |  |  |  |  |  |  |  |  |  |  |  |  |  |     |  |  |  |  |  |  |  |  |  |  |  |  |  |  |  |  |  |  |  |     |  |  |  |  |  |  |  |  |  |  |  |  |  |  |  |  |  |  |  |  |
| BA71V_ (Spain-1971)         | --GASTCADT   | NVDTCASTCA | DTNVDTCAST | CA         |            |            |            |              |            |            |            |          | 276  |         |      |        |      |     |  |  |  |     |  |  |  |  |  |  |  |  |  |  |  |  |  |  |  |  |  |  |  |     |  |  |  |  |  |  |  |  |  |  |  |  |  |  |  |  |  |  |  |     |  |  |  |  |  |  |  |  |  |  |  |  |  |  |  |  |  |  |  |     |  |  |  |  |  |  |  |  |  |  |  |  |  |  |  |  |  |  |  |  |
| OURT_88/3_ (Portugal-1988)  | STGASTCADT   | NVDTCASTCA | DTNVDTCAST | CA         |            |            |            |              |            |            |            |          | 348  |         |      |        |      |     |  |  |  |     |  |  |  |  |  |  |  |  |  |  |  |  |  |  |  |  |  |  |  |     |  |  |  |  |  |  |  |  |  |  |  |  |  |  |  |  |  |  |  |     |  |  |  |  |  |  |  |  |  |  |  |  |  |  |  |  |  |  |  |     |  |  |  |  |  |  |  |  |  |  |  |  |  |  |  |  |  |  |  |  |
| NHV_ (Portugal-1968)        | STGASTCADT   | NVDTCASTCA | DTNVDTCAST | CA         |            |            |            |              |            |            |            |          | 344  |         |      |        |      |     |  |  |  |     |  |  |  |  |  |  |  |  |  |  |  |  |  |  |  |  |  |  |  |     |  |  |  |  |  |  |  |  |  |  |  |  |  |  |  |  |  |  |  |     |  |  |  |  |  |  |  |  |  |  |  |  |  |  |  |  |  |  |  |     |  |  |  |  |  |  |  |  |  |  |  |  |  |  |  |  |  |  |  |  |
| Benin_97/1_ (Benin-1997)    | STGASTCADT   | NVDTCASTCA | STCASTCAST | CASTGASTCA |            |            |            |              |            |            |            |          | 308  |         |      |        |      |     |  |  |  |     |  |  |  |  |  |  |  |  |  |  |  |  |  |  |  |  |  |  |  |     |  |  |  |  |  |  |  |  |  |  |  |  |  |  |  |  |  |  |  |     |  |  |  |  |  |  |  |  |  |  |  |  |  |  |  |  |  |  |  |     |  |  |  |  |  |  |  |  |  |  |  |  |  |  |  |  |  |  |  |  |
| Conservation                |              |            |            |            |            |            |            |              |            |            |            |          |      |         |      |        |      |     |  |  |  |     |  |  |  |  |  |  |  |  |  |  |  |  |  |  |  |  |  |  |  |     |  |  |  |  |  |  |  |  |  |  |  |  |  |  |  |  |  |  |  |     |  |  |  |  |  |  |  |  |  |  |  |  |  |  |  |  |  |  |  |     |  |  |  |  |  |  |  |  |  |  |  |  |  |  |  |  |  |  |  |  |
|                             |              | 380        |            |            |            |            |            |              |            |            |            |          |      |         |      |        |      |     |  |  |  | 400 |  |  |  |  |  |  |  |  |  |  |  |  |  |  |  |  |  |  |  | 420 |  |  |  |  |  |  |  |  |  |  |  |  |  |  |  |  |  |  |  | 440 |  |  |  |  |  |  |  |  |  |  |  |  |  |  |  |  |  |  |  |     |  |  |  |  |  |  |  |  |  |  |  |  |  |  |  |  |  |  |  |  |
| Ghana2022-34,35,40&62_B602L | LADPERIPLH   | IMQKTLNVP  | ELQADIDA   | ITQTPQG    | YRAAA      | HILQNI     | ELHQ       | SIKHML       | ENPR       | AFKPIL     | FN         | TKITRYLS | QHIP | PQDTFY  | KWNY | 294    |      |     |  |  |  |     |  |  |  |  |  |  |  |  |  |  |  |  |  |  |  |  |  |  |  |     |  |  |  |  |  |  |  |  |  |  |  |  |  |  |  |  |  |  |  |     |  |  |  |  |  |  |  |  |  |  |  |  |  |  |  |  |  |  |  |     |  |  |  |  |  |  |  |  |  |  |  |  |  |  |  |  |  |  |  |  |
| ASFV-G (Georgia-2007)       |              |            |            |            |            |            |            |              |            |            |            |          |      |         |      | 294    |      |     |  |  |  |     |  |  |  |  |  |  |  |  |  |  |  |  |  |  |  |  |  |  |  |     |  |  |  |  |  |  |  |  |  |  |  |  |  |  |  |  |  |  |  |     |  |  |  |  |  |  |  |  |  |  |  |  |  |  |  |  |  |  |  |     |  |  |  |  |  |  |  |  |  |  |  |  |  |  |  |  |  |  |  |  |
| L60_ (Portugal-1960)        |              |            |            |            |            |            |            |              |            |            |            |          |      |         |      | 354    |      |     |  |  |  |     |  |  |  |  |  |  |  |  |  |  |  |  |  |  |  |  |  |  |  |     |  |  |  |  |  |  |  |  |  |  |  |  |  |  |  |  |  |  |  |     |  |  |  |  |  |  |  |  |  |  |  |  |  |  |  |  |  |  |  |     |  |  |  |  |  |  |  |  |  |  |  |  |  |  |  |  |  |  |  |  |
| BA71V_ (Spain-1971)         |              |            |            |            |            |            |            |              |            |            |            |          |      |         |      | 366    |      |     |  |  |  |     |  |  |  |  |  |  |  |  |  |  |  |  |  |  |  |  |  |  |  |     |  |  |  |  |  |  |  |  |  |  |  |  |  |  |  |  |  |  |  |     |  |  |  |  |  |  |  |  |  |  |  |  |  |  |  |  |  |  |  |     |  |  |  |  |  |  |  |  |  |  |  |  |  |  |  |  |  |  |  |  |
| OURT_88/3_ (Portugal-1988)  |              |            |            |            |            |            |            |              |            |            |            |          |      |         |      | 438    |      |     |  |  |  |     |  |  |  |  |  |  |  |  |  |  |  |  |  |  |  |  |  |  |  |     |  |  |  |  |  |  |  |  |  |  |  |  |  |  |  |  |  |  |  |     |  |  |  |  |  |  |  |  |  |  |  |  |  |  |  |  |  |  |  |     |  |  |  |  |  |  |  |  |  |  |  |  |  |  |  |  |  |  |  |  |
| NHV_ (Portugal-1968)        |              |            |            |            |            |            |            |              |            |            |            |          |      |         |      | 434    |      |     |  |  |  |     |  |  |  |  |  |  |  |  |  |  |  |  |  |  |  |  |  |  |  |     |  |  |  |  |  |  |  |  |  |  |  |  |  |  |  |  |  |  |  |     |  |  |  |  |  |  |  |  |  |  |  |  |  |  |  |  |  |  |  |     |  |  |  |  |  |  |  |  |  |  |  |  |  |  |  |  |  |  |  |  |
| Benin_97/1_ (Benin-1997)    |              |            |            |            |            |            |            |              |            |            |            |          |      |         |      | 398    |      |     |  |  |  |     |  |  |  |  |  |  |  |  |  |  |  |  |  |  |  |  |  |  |  |     |  |  |  |  |  |  |  |  |  |  |  |  |  |  |  |  |  |  |  |     |  |  |  |  |  |  |  |  |  |  |  |  |  |  |  |  |  |  |  |     |  |  |  |  |  |  |  |  |  |  |  |  |  |  |  |  |  |  |  |  |
| Conservation                |              |            |            |            |            |            |            |              |            |            |            |          |      |         |      |        |      |     |  |  |  |     |  |  |  |  |  |  |  |  |  |  |  |  |  |  |  |  |  |  |  |     |  |  |  |  |  |  |  |  |  |  |  |  |  |  |  |  |  |  |  |     |  |  |  |  |  |  |  |  |  |  |  |  |  |  |  |  |  |  |  |     |  |  |  |  |  |  |  |  |  |  |  |  |  |  |  |  |  |  |  |  |
|                             |              | 460        |            |            |            |            |            |              |            |            |            |          |      |         |      |        |      |     |  |  |  | 480 |  |  |  |  |  |  |  |  |  |  |  |  |  |  |  |  |  |  |  | 500 |  |  |  |  |  |  |  |  |  |  |  |  |  |  |  |  |  |  |  | 520 |  |  |  |  |  |  |  |  |  |  |  |  |  |  |  |  |  |  |  | 540 |  |  |  |  |  |  |  |  |  |  |  |  |  |  |  |  |  |  |  |  |
| Ghana2022-34,35,40&62_B602L | YIEDNYEELR   | AATESIYPEK | PDLEFAFIIY | DVD        | DSSNQ      | QKVDEFY    | YKYKD      | QIFSEVSS     | IQ         | LGNWTLLGSF | KANRERYNYF | NQNNEI   | IKRI | 384     |      |        |      |     |  |  |  |     |  |  |  |  |  |  |  |  |  |  |  |  |  |  |  |  |  |  |  |     |  |  |  |  |  |  |  |  |  |  |  |  |  |  |  |  |  |  |  |     |  |  |  |  |  |  |  |  |  |  |  |  |  |  |  |  |  |  |  |     |  |  |  |  |  |  |  |  |  |  |  |  |  |  |  |  |  |  |  |  |
| ASFV-G (Georgia-2007)       |              |            |            |            |            |            |            |              |            |            |            |          |      | 384     |      |        |      |     |  |  |  |     |  |  |  |  |  |  |  |  |  |  |  |  |  |  |  |  |  |  |  |     |  |  |  |  |  |  |  |  |  |  |  |  |  |  |  |  |  |  |  |     |  |  |  |  |  |  |  |  |  |  |  |  |  |  |  |  |  |  |  |     |  |  |  |  |  |  |  |  |  |  |  |  |  |  |  |  |  |  |  |  |
| L60_ (Portugal-1960)        |              |            |            |            |            |            |            |              |            |            |            |          |      | 444     |      |        |      |     |  |  |  |     |  |  |  |  |  |  |  |  |  |  |  |  |  |  |  |  |  |  |  |     |  |  |  |  |  |  |  |  |  |  |  |  |  |  |  |  |  |  |  |     |  |  |  |  |  |  |  |  |  |  |  |  |  |  |  |  |  |  |  |     |  |  |  |  |  |  |  |  |  |  |  |  |  |  |  |  |  |  |  |  |
| BA71V_ (Spain-1971)         |              |            |            |            |            |            |            |              |            |            |            |          |      | 456     |      |        |      |     |  |  |  |     |  |  |  |  |  |  |  |  |  |  |  |  |  |  |  |  |  |  |  |     |  |  |  |  |  |  |  |  |  |  |  |  |  |  |  |  |  |  |  |     |  |  |  |  |  |  |  |  |  |  |  |  |  |  |  |  |  |  |  |     |  |  |  |  |  |  |  |  |  |  |  |  |  |  |  |  |  |  |  |  |
| OURT_88/3_ (Portugal-1988)  |              |            |            |            |            |            |            |              |            |            |            |          |      | 528     |      |        |      |     |  |  |  |     |  |  |  |  |  |  |  |  |  |  |  |  |  |  |  |  |  |  |  |     |  |  |  |  |  |  |  |  |  |  |  |  |  |  |  |  |  |  |  |     |  |  |  |  |  |  |  |  |  |  |  |  |  |  |  |  |  |  |  |     |  |  |  |  |  |  |  |  |  |  |  |  |  |  |  |  |  |  |  |  |
| NHV_ (Portugal-1968)        |              |            |            |            |            |            |            |              |            |            |            |          |      | 524     |      |        |      |     |  |  |  |     |  |  |  |  |  |  |  |  |  |  |  |  |  |  |  |  |  |  |  |     |  |  |  |  |  |  |  |  |  |  |  |  |  |  |  |  |  |  |  |     |  |  |  |  |  |  |  |  |  |  |  |  |  |  |  |  |  |  |  |     |  |  |  |  |  |  |  |  |  |  |  |  |  |  |  |  |  |  |  |  |
| Benin_97/1_ (Benin-1997)    |              |            |            |            |            |            |            |              |            |            |            |          |      | 488     |      |        |      |     |  |  |  |     |  |  |  |  |  |  |  |  |  |  |  |  |  |  |  |  |  |  |  |     |  |  |  |  |  |  |  |  |  |  |  |  |  |  |  |  |  |  |  |     |  |  |  |  |  |  |  |  |  |  |  |  |  |  |  |  |  |  |  |     |  |  |  |  |  |  |  |  |  |  |  |  |  |  |  |  |  |  |  |  |
| Conservation                |              |            |            |            |            |            |            |              |            |            |            |          |      |         |      |        |      |     |  |  |  |     |  |  |  |  |  |  |  |  |  |  |  |  |  |  |  |  |  |  |  |     |  |  |  |  |  |  |  |  |  |  |  |  |  |  |  |  |  |  |  |     |  |  |  |  |  |  |  |  |  |  |  |  |  |  |  |  |  |  |  |     |  |  |  |  |  |  |  |  |  |  |  |  |  |  |  |  |  |  |  |  |
|                             |              | 560        |            |            |            |            |            |              |            |            |            |          |      |         |      |        |      |     |  |  |  | 580 |  |  |  |  |  |  |  |  |  |  |  |  |  |  |  |  |  |  |  | 600 |  |  |  |  |  |  |  |  |  |  |  |  |  |  |  |  |  |  |  | 620 |  |  |  |  |  |  |  |  |  |  |  |  |  |  |  |  |  |  |  |     |  |  |  |  |  |  |  |  |  |  |  |  |  |  |  |  |  |  |  |  |
| Ghana2022-34,35,40&62_B602L | LDRHEEDLK    | I          | GKEIL      | RNTIY      | HKKAKN     | IQET       | GPDAPGLS   | IYNSTF       | HTD        | SGIKGLLS   | FKELK      | NLEKASGN | IK   | KAREYDF | IDD  | CEEKIK | QLLS | 474 |  |  |  |     |  |  |  |  |  |  |  |  |  |  |  |  |  |  |  |  |  |  |  |     |  |  |  |  |  |  |  |  |  |  |  |  |  |  |  |  |  |  |  |     |  |  |  |  |  |  |  |  |  |  |  |  |  |  |  |  |  |  |  |     |  |  |  |  |  |  |  |  |  |  |  |  |  |  |  |  |  |  |  |  |
| ASFV-G (Georgia-2007)       |              |            |            |            |            |            |            |              |            |            |            |          |      |         |      |        |      | 474 |  |  |  |     |  |  |  |  |  |  |  |  |  |  |  |  |  |  |  |  |  |  |  |     |  |  |  |  |  |  |  |  |  |  |  |  |  |  |  |  |  |  |  |     |  |  |  |  |  |  |  |  |  |  |  |  |  |  |  |  |  |  |  |     |  |  |  |  |  |  |  |  |  |  |  |  |  |  |  |  |  |  |  |  |
| L60_ (Portugal-1960)        |              |            |            |            |            |            |            |              |            |            |            |          |      |         |      |        |      | 534 |  |  |  |     |  |  |  |  |  |  |  |  |  |  |  |  |  |  |  |  |  |  |  |     |  |  |  |  |  |  |  |  |  |  |  |  |  |  |  |  |  |  |  |     |  |  |  |  |  |  |  |  |  |  |  |  |  |  |  |  |  |  |  |     |  |  |  |  |  |  |  |  |  |  |  |  |  |  |  |  |  |  |  |  |
| BA71V_ (Spain-1971)         |              |            |            |            |            |            |            |              |            |            |            |          |      |         |      |        |      | 546 |  |  |  |     |  |  |  |  |  |  |  |  |  |  |  |  |  |  |  |  |  |  |  |     |  |  |  |  |  |  |  |  |  |  |  |  |  |  |  |  |  |  |  |     |  |  |  |  |  |  |  |  |  |  |  |  |  |  |  |  |  |  |  |     |  |  |  |  |  |  |  |  |  |  |  |  |  |  |  |  |  |  |  |  |
| OURT_88/3_ (Portugal-1988)  |              |            |            |            |            |            |            |              |            |            |            |          |      |         |      |        |      | 618 |  |  |  |     |  |  |  |  |  |  |  |  |  |  |  |  |  |  |  |  |  |  |  |     |  |  |  |  |  |  |  |  |  |  |  |  |  |  |  |  |  |  |  |     |  |  |  |  |  |  |  |  |  |  |  |  |  |  |  |  |  |  |  |     |  |  |  |  |  |  |  |  |  |  |  |  |  |  |  |  |  |  |  |  |
| NHV_ (Portugal-1968)        |              |            |            |            |            |            |            |              |            |            |            |          |      |         |      |        |      | 614 |  |  |  |     |  |  |  |  |  |  |  |  |  |  |  |  |  |  |  |  |  |  |  |     |  |  |  |  |  |  |  |  |  |  |  |  |  |  |  |  |  |  |  |     |  |  |  |  |  |  |  |  |  |  |  |  |  |  |  |  |  |  |  |     |  |  |  |  |  |  |  |  |  |  |  |  |  |  |  |  |  |  |  |  |
| Benin_97/1_ (Benin-1997)    |              |            |            |            |            |            |            |              |            |            |            |          |      |         |      |        |      | 578 |  |  |  |     |  |  |  |  |  |  |  |  |  |  |  |  |  |  |  |  |  |  |  |     |  |  |  |  |  |  |  |  |  |  |  |  |  |  |  |  |  |  |  |     |  |  |  |  |  |  |  |  |  |  |  |  |  |  |  |  |  |  |  |     |  |  |  |  |  |  |  |  |  |  |  |  |  |  |  |  |  |  |  |  |
| Conservation                |              |            |            |            |            |            |            |              |            |            |            |          |      |         |      |        |      |     |  |  |  |     |  |  |  |  |  |  |  |  |  |  |  |  |  |  |  |  |  |  |  |     |  |  |  |  |  |  |  |  |  |  |  |  |  |  |  |  |  |  |  |     |  |  |  |  |  |  |  |  |  |  |  |  |  |  |  |  |  |  |  |     |  |  |  |  |  |  |  |  |  |  |  |  |  |  |  |  |  |  |  |  |
|                             |              | 640        |            |            |            |            |            |              |            |            |            |          |      |         |      |        |      |     |  |  |  | 660 |  |  |  |  |  |  |  |  |  |  |  |  |  |  |  |  |  |  |  | 680 |  |  |  |  |  |  |  |  |  |  |  |  |  |  |  |  |  |  |  |     |  |  |  |  |  |  |  |  |  |  |  |  |  |  |  |  |  |  |  |     |  |  |  |  |  |  |  |  |  |  |  |  |  |  |  |  |  |  |  |  |
| Ghana2022-34,35,40&62_B602L | KENLTPDEES   | ELIK       | TKKQLD     | NALEML     | NVPD       | DTIR       | VDMWVN     | NNN          | KLEKEIL    | YTKAEL     | *          | 531      |      |         |      |        |      |     |  |  |  |     |  |  |  |  |  |  |  |  |  |  |  |  |  |  |  |  |  |  |  |     |  |  |  |  |  |  |  |  |  |  |  |  |  |  |  |  |  |  |  |     |  |  |  |  |  |  |  |  |  |  |  |  |  |  |  |  |  |  |  |     |  |  |  |  |  |  |  |  |  |  |  |  |  |  |  |  |  |  |  |  |
| ASFV-G (Georgia-2007)       |              |            |            |            |            |            |            |              |            |            |            | 531      |      |         |      |        |      |     |  |  |  |     |  |  |  |  |  |  |  |  |  |  |  |  |  |  |  |  |  |  |  |     |  |  |  |  |  |  |  |  |  |  |  |  |  |  |  |  |  |  |  |     |  |  |  |  |  |  |  |  |  |  |  |  |  |  |  |  |  |  |  |     |  |  |  |  |  |  |  |  |  |  |  |  |  |  |  |  |  |  |  |  |
| L60_ (Portugal-1960)        |              |            |            |            |            |            |            |              |            |            |            | 591      |      |         |      |        |      |     |  |  |  |     |  |  |  |  |  |  |  |  |  |  |  |  |  |  |  |  |  |  |  |     |  |  |  |  |  |  |  |  |  |  |  |  |  |  |  |  |  |  |  |     |  |  |  |  |  |  |  |  |  |  |  |  |  |  |  |  |  |  |  |     |  |  |  |  |  |  |  |  |  |  |  |  |  |  |  |  |  |  |  |  |
| BA71V_ (Spain-1971)         |              |            |            |            |            |            |            |              |            |            |            | 603      |      |         |      |        |      |     |  |  |  |     |  |  |  |  |  |  |  |  |  |  |  |  |  |  |  |  |  |  |  |     |  |  |  |  |  |  |  |  |  |  |  |  |  |  |  |  |  |  |  |     |  |  |  |  |  |  |  |  |  |  |  |  |  |  |  |  |  |  |  |     |  |  |  |  |  |  |  |  |  |  |  |  |  |  |  |  |  |  |  |  |
| OURT_88/3_ (Portugal-1988)  |              |            |            |            |            |            |            |              |            |            |            | 675      |      |         |      |        |      |     |  |  |  |     |  |  |  |  |  |  |  |  |  |  |  |  |  |  |  |  |  |  |  |     |  |  |  |  |  |  |  |  |  |  |  |  |  |  |  |  |  |  |  |     |  |  |  |  |  |  |  |  |  |  |  |  |  |  |  |  |  |  |  |     |  |  |  |  |  |  |  |  |  |  |  |  |  |  |  |  |  |  |  |  |
| NHV_ (Portugal-1968)        |              |            |            |            |            |            |            |              |            |            |            | 671      |      |         |      |        |      |     |  |  |  |     |  |  |  |  |  |  |  |  |  |  |  |  |  |  |  |  |  |  |  |     |  |  |  |  |  |  |  |  |  |  |  |  |  |  |  |  |  |  |  |     |  |  |  |  |  |  |  |  |  |  |  |  |  |  |  |  |  |  |  |     |  |  |  |  |  |  |  |  |  |  |  |  |  |  |  |  |  |  |  |  |
| Benin_97/1_ (Benin-1997)    |              |            |            |            |            |            |            |              |            |            |            | 635      |      |         |      |        |      |     |  |  |  |     |  |  |  |  |  |  |  |  |  |  |  |  |  |  |  |  |  |  |  |     |  |  |  |  |  |  |  |  |  |  |  |  |  |  |  |  |  |  |  |     |  |  |  |  |  |  |  |  |  |  |  |  |  |  |  |  |  |  |  |     |  |  |  |  |  |  |  |  |  |  |  |  |  |  |  |  |  |  |  |  |
| Conservation                |              |            |            |            |            |            |            |              |            |            |            |          |      |         |      |        |      |     |  |  |  |     |  |  |  |  |  |  |  |  |  |  |  |  |  |  |  |  |  |  |  |     |  |  |  |  |  |  |  |  |  |  |  |  |  |  |  |  |  |  |  |     |  |  |  |  |  |  |  |  |  |  |  |  |  |  |  |  |  |  |  |     |  |  |  |  |  |  |  |  |  |  |  |  |  |  |  |  |  |  |  |  |

|                    |                                                    |                                                                                                                                                                                                                                                                                                                                                                                                                                                                                                                                                                                                                                                                                                                                                                                                                                                                                                                                                                                                                                                                                                                                                                                                                                                                                                                                                                                                                                                                                                                                                                                                                                                                                                                                                                                                                                                                                                                                                                                                                                                                                                                                                                                                                                                                                                                                                                                                                                                                                                                                                                                                                                                                                                                                                                                                                                                                                                                                                                                                                                                                                                                                                                                                                                                                                                                                                                                                                                                                                                                                                                                                                                                                                                                                                                                                                                                                                                                                                                                                                                                                                                                                                                                                                                                                                                                                                                                                                                                                                                                                                                                                                                                                                                                                                                                                                                                                                                                                                                                                                                                                                                                                                                                                                                                                                                                                                                                                                                                                                                                                                                                                                                                                                                                                                                                                                                                                                                                                                                                                                                                                                                                                                                                                                                                                                                                                                                                                                                                                                                                                                                                                                                                                                                                                                                                                                                                                                                                                                                                                                                                                                                                                                                                                                                                                                                                                                                                                                                                                                                                                                                                                                                                                                                                                                                                                                                                                                                                                                                                                                                                                                                                                                                                                                                                                                                                                                                                                                                                                                                                                                                                                                                                                                                                                                                                                                                                                                                                                                                                                                                                                                                                                                                                                                                                                                                                                                                                                                                                                                                                                                                                                                                                                                                                                                                                                                                                                                                                                                                                                                                                                                                                                                                                                                                                                                                                                                                                                                                                      |             |            |             |             |            |             |             |            |    |
|--------------------|----------------------------------------------------|------------------------------------------------------------------------------------------------------------------------------------------------------------------------------------------------------------------------------------------------------------------------------------------------------------------------------------------------------------------------------------------------------------------------------------------------------------------------------------------------------------------------------------------------------------------------------------------------------------------------------------------------------------------------------------------------------------------------------------------------------------------------------------------------------------------------------------------------------------------------------------------------------------------------------------------------------------------------------------------------------------------------------------------------------------------------------------------------------------------------------------------------------------------------------------------------------------------------------------------------------------------------------------------------------------------------------------------------------------------------------------------------------------------------------------------------------------------------------------------------------------------------------------------------------------------------------------------------------------------------------------------------------------------------------------------------------------------------------------------------------------------------------------------------------------------------------------------------------------------------------------------------------------------------------------------------------------------------------------------------------------------------------------------------------------------------------------------------------------------------------------------------------------------------------------------------------------------------------------------------------------------------------------------------------------------------------------------------------------------------------------------------------------------------------------------------------------------------------------------------------------------------------------------------------------------------------------------------------------------------------------------------------------------------------------------------------------------------------------------------------------------------------------------------------------------------------------------------------------------------------------------------------------------------------------------------------------------------------------------------------------------------------------------------------------------------------------------------------------------------------------------------------------------------------------------------------------------------------------------------------------------------------------------------------------------------------------------------------------------------------------------------------------------------------------------------------------------------------------------------------------------------------------------------------------------------------------------------------------------------------------------------------------------------------------------------------------------------------------------------------------------------------------------------------------------------------------------------------------------------------------------------------------------------------------------------------------------------------------------------------------------------------------------------------------------------------------------------------------------------------------------------------------------------------------------------------------------------------------------------------------------------------------------------------------------------------------------------------------------------------------------------------------------------------------------------------------------------------------------------------------------------------------------------------------------------------------------------------------------------------------------------------------------------------------------------------------------------------------------------------------------------------------------------------------------------------------------------------------------------------------------------------------------------------------------------------------------------------------------------------------------------------------------------------------------------------------------------------------------------------------------------------------------------------------------------------------------------------------------------------------------------------------------------------------------------------------------------------------------------------------------------------------------------------------------------------------------------------------------------------------------------------------------------------------------------------------------------------------------------------------------------------------------------------------------------------------------------------------------------------------------------------------------------------------------------------------------------------------------------------------------------------------------------------------------------------------------------------------------------------------------------------------------------------------------------------------------------------------------------------------------------------------------------------------------------------------------------------------------------------------------------------------------------------------------------------------------------------------------------------------------------------------------------------------------------------------------------------------------------------------------------------------------------------------------------------------------------------------------------------------------------------------------------------------------------------------------------------------------------------------------------------------------------------------------------------------------------------------------------------------------------------------------------------------------------------------------------------------------------------------------------------------------------------------------------------------------------------------------------------------------------------------------------------------------------------------------------------------------------------------------------------------------------------------------------------------------------------------------------------------------------------------------------------------------------------------------------------------------------------------------------------------------------------------------------------------------------------------------------------------------------------------------------------------------------------------------------------------------------------------------------------------------------------------------------------------------------------------------------------------------------------------------------------------------------------------------------------------------------------------------------------------------------------------------------------------------------------------------------------------------------------------------------------------------------------------------------------------------------------------------------------------------------------------------------------------------------------------------------------------------------------------------------------------------------------------------------------------------------------------------------------------------------------------------------------------------------------------------------------------------------------------------------------------------------------------------------------------------------------------------------------------------------------------------------------------------------------------------------------------------------------------------------------------------------------------------------------------------------------------------------------------------------------------------------------------------------------------------------------------------------------------------------------------------------------------------------------------------------------------------------------------------------------------------------------------------------------------------------------------------------------------------------------------------------------------------------------------------------------------------------------------------------------------------------------------------------------------------------------------------------------------------------------------------------------------------------------------------------------------------------------------------------------------------------------------------------------------------------------------------------------------------------------------------------------------------------------------------------------------------------------------------------------------------------------------------------------------------------------------------------------------------------------------------------------------------------------------------------------------------------------------------------------------------------------------------------------------------------------------------------------------------------------------------------------|-------------|------------|-------------|-------------|------------|-------------|-------------|------------|----|
|                    | Ghana2022-40_C315R                                 | MDALLKE IEK                                                                                                                                                                                                                                                                                                                                                                                                                                                                                                                                                                                                                                                                                                                                                                                                                                                                                                                                                                                                                                                                                                                                                                                                                                                                                                                                                                                                                                                                                                                                                                                                                                                                                                                                                                                                                                                                                                                                                                                                                                                                                                                                                                                                                                                                                                                                                                                                                                                                                                                                                                                                                                                                                                                                                                                                                                                                                                                                                                                                                                                                                                                                                                                                                                                                                                                                                                                                                                                                                                                                                                                                                                                                                                                                                                                                                                                                                                                                                                                                                                                                                                                                                                                                                                                                                                                                                                                                                                                                                                                                                                                                                                                                                                                                                                                                                                                                                                                                                                                                                                                                                                                                                                                                                                                                                                                                                                                                                                                                                                                                                                                                                                                                                                                                                                                                                                                                                                                                                                                                                                                                                                                                                                                                                                                                                                                                                                                                                                                                                                                                                                                                                                                                                                                                                                                                                                                                                                                                                                                                                                                                                                                                                                                                                                                                                                                                                                                                                                                                                                                                                                                                                                                                                                                                                                                                                                                                                                                                                                                                                                                                                                                                                                                                                                                                                                                                                                                                                                                                                                                                                                                                                                                                                                                                                                                                                                                                                                                                                                                                                                                                                                                                                                                                                                                                                                                                                                                                                                                                                                                                                                                                                                                                                                                                                                                                                                                                                                                                                                                                                                                                                                                                                                                                                                                                                                                                                                                                                                          | LSQPS -LQKE | NNDVCDLCFM | HMKK ISNYQL | LCEECEGQLKD | WFEPEYNEKF | TVYSRLK IVG | ANSSYHQRD L | DKANSSDYSS | 89 |
|                    | ASFV-G (Gerogia-2007)                              | .                                                                                                                                                                                                                                                                                                                                                                                                                                                                                                                                                                                                                                                                                                                                                                                                                                                                                                                                                                                                                                                                                                                                                                                                                                                                                                                                                                                                                                                                                                                                                                                                                                                                                                                                                                                                                                                                                                                                                                                                                                                                                                                                                                                                                                                                                                                                                                                                                                                                                                                                                                                                                                                                                                                                                                                                                                                                                                                                                                                                                                                                                                                                                                                                                                                                                                                                                                                                                                                                                                                                                                                                                                                                                                                                                                                                                                                                                                                                                                                                                                                                                                                                                                                                                                                                                                                                                                                                                                                                                                                                                                                                                                                                                                                                                                                                                                                                                                                                                                                                                                                                                                                                                                                                                                                                                                                                                                                                                                                                                                                                                                                                                                                                                                                                                                                                                                                                                                                                                                                                                                                                                                                                                                                                                                                                                                                                                                                                                                                                                                                                                                                                                                                                                                                                                                                                                                                                                                                                                                                                                                                                                                                                                                                                                                                                                                                                                                                                                                                                                                                                                                                                                                                                                                                                                                                                                                                                                                                                                                                                                                                                                                                                                                                                                                                                                                                                                                                                                                                                                                                                                                                                                                                                                                                                                                                                                                                                                                                                                                                                                                                                                                                                                                                                                                                                                                                                                                                                                                                                                                                                                                                                                                                                                                                                                                                                                                                                                                                                                                                                                                                                                                                                                                                                                                                                                                                                                                                                                                                    | .           | -          | Q           | .           | .          | .           | .           | .          | 89 |
|                    | L60 (Portugal-1960)                                | .                                                                                                                                                                                                                                                                                                                                                                                                                                                                                                                                                                                                                                                                                                                                                                                                                                                                                                                                                                                                                                                                                                                                                                                                                                                                                                                                                                                                                                                                                                                                                                                                                                                                                                                                                                                                                                                                                                                                                                                                                                                                                                                                                                                                                                                                                                                                                                                                                                                                                                                                                                                                                                                                                                                                                                                                                                                                                                                                                                                                                                                                                                                                                                                                                                                                                                                                                                                                                                                                                                                                                                                                                                                                                                                                                                                                                                                                                                                                                                                                                                                                                                                                                                                                                                                                                                                                                                                                                                                                                                                                                                                                                                                                                                                                                                                                                                                                                                                                                                                                                                                                                                                                                                                                                                                                                                                                                                                                                                                                                                                                                                                                                                                                                                                                                                                                                                                                                                                                                                                                                                                                                                                                                                                                                                                                                                                                                                                                                                                                                                                                                                                                                                                                                                                                                                                                                                                                                                                                                                                                                                                                                                                                                                                                                                                                                                                                                                                                                                                                                                                                                                                                                                                                                                                                                                                                                                                                                                                                                                                                                                                                                                                                                                                                                                                                                                                                                                                                                                                                                                                                                                                                                                                                                                                                                                                                                                                                                                                                                                                                                                                                                                                                                                                                                                                                                                                                                                                                                                                                                                                                                                                                                                                                                                                                                                                                                                                                                                                                                                                                                                                                                                                                                                                                                                                                                                                                                                                                                                                    | .           | -          | Q           | .           | .          | .           | .           | .          | 89 |
|                    | BA71V (Spain-1971)                                 | .                                                                                                                                                                                                                                                                                                                                                                                                                                                                                                                                                                                                                                                                                                                                                                                                                                                                                                                                                                                                                                                                                                                                                                                                                                                                                                                                                                                                                                                                                                                                                                                                                                                                                                                                                                                                                                                                                                                                                                                                                                                                                                                                                                                                                                                                                                                                                                                                                                                                                                                                                                                                                                                                                                                                                                                                                                                                                                                                                                                                                                                                                                                                                                                                                                                                                                                                                                                                                                                                                                                                                                                                                                                                                                                                                                                                                                                                                                                                                                                                                                                                                                                                                                                                                                                                                                                                                                                                                                                                                                                                                                                                                                                                                                                                                                                                                                                                                                                                                                                                                                                                                                                                                                                                                                                                                                                                                                                                                                                                                                                                                                                                                                                                                                                                                                                                                                                                                                                                                                                                                                                                                                                                                                                                                                                                                                                                                                                                                                                                                                                                                                                                                                                                                                                                                                                                                                                                                                                                                                                                                                                                                                                                                                                                                                                                                                                                                                                                                                                                                                                                                                                                                                                                                                                                                                                                                                                                                                                                                                                                                                                                                                                                                                                                                                                                                                                                                                                                                                                                                                                                                                                                                                                                                                                                                                                                                                                                                                                                                                                                                                                                                                                                                                                                                                                                                                                                                                                                                                                                                                                                                                                                                                                                                                                                                                                                                                                                                                                                                                                                                                                                                                                                                                                                                                                                                                                                                                                                                                                    | .           | -          | Q           | .           | .          | .           | .           | .          | 89 |
|                    | Benin 97/1 (Benin-1997)                            | .                                                                                                                                                                                                                                                                                                                                                                                                                                                                                                                                                                                                                                                                                                                                                                                                                                                                                                                                                                                                                                                                                                                                                                                                                                                                                                                                                                                                                                                                                                                                                                                                                                                                                                                                                                                                                                                                                                                                                                                                                                                                                                                                                                                                                                                                                                                                                                                                                                                                                                                                                                                                                                                                                                                                                                                                                                                                                                                                                                                                                                                                                                                                                                                                                                                                                                                                                                                                                                                                                                                                                                                                                                                                                                                                                                                                                                                                                                                                                                                                                                                                                                                                                                                                                                                                                                                                                                                                                                                                                                                                                                                                                                                                                                                                                                                                                                                                                                                                                                                                                                                                                                                                                                                                                                                                                                                                                                                                                                                                                                                                                                                                                                                                                                                                                                                                                                                                                                                                                                                                                                                                                                                                                                                                                                                                                                                                                                                                                                                                                                                                                                                                                                                                                                                                                                                                                                                                                                                                                                                                                                                                                                                                                                                                                                                                                                                                                                                                                                                                                                                                                                                                                                                                                                                                                                                                                                                                                                                                                                                                                                                                                                                                                                                                                                                                                                                                                                                                                                                                                                                                                                                                                                                                                                                                                                                                                                                                                                                                                                                                                                                                                                                                                                                                                                                                                                                                                                                                                                                                                                                                                                                                                                                                                                                                                                                                                                                                                                                                                                                                                                                                                                                                                                                                                                                                                                                                                                                                                                                    | .           | -          | Q           | .           | .          | .           | .           | .          | 89 |
|                    | E75 (Spain-1975)                                   | .                                                                                                                                                                                                                                                                                                                                                                                                                                                                                                                                                                                                                                                                                                                                                                                                                                                                                                                                                                                                                                                                                                                                                                                                                                                                                                                                                                                                                                                                                                                                                                                                                                                                                                                                                                                                                                                                                                                                                                                                                                                                                                                                                                                                                                                                                                                                                                                                                                                                                                                                                                                                                                                                                                                                                                                                                                                                                                                                                                                                                                                                                                                                                                                                                                                                                                                                                                                                                                                                                                                                                                                                                                                                                                                                                                                                                                                                                                                                                                                                                                                                                                                                                                                                                                                                                                                                                                                                                                                                                                                                                                                                                                                                                                                                                                                                                                                                                                                                                                                                                                                                                                                                                                                                                                                                                                                                                                                                                                                                                                                                                                                                                                                                                                                                                                                                                                                                                                                                                                                                                                                                                                                                                                                                                                                                                                                                                                                                                                                                                                                                                                                                                                                                                                                                                                                                                                                                                                                                                                                                                                                                                                                                                                                                                                                                                                                                                                                                                                                                                                                                                                                                                                                                                                                                                                                                                                                                                                                                                                                                                                                                                                                                                                                                                                                                                                                                                                                                                                                                                                                                                                                                                                                                                                                                                                                                                                                                                                                                                                                                                                                                                                                                                                                                                                                                                                                                                                                                                                                                                                                                                                                                                                                                                                                                                                                                                                                                                                                                                                                                                                                                                                                                                                                                                                                                                                                                                                                                                                                    | .           | -          | Q           | .           | .          | .           | .           | .          | 89 |
|                    | OURT 88/3 (Portugal-1988)                          | .                                                                                                                                                                                                                                                                                                                                                                                                                                                                                                                                                                                                                                                                                                                                                                                                                                                                                                                                                                                                                                                                                                                                                                                                                                                                                                                                                                                                                                                                                                                                                                                                                                                                                                                                                                                                                                                                                                                                                                                                                                                                                                                                                                                                                                                                                                                                                                                                                                                                                                                                                                                                                                                                                                                                                                                                                                                                                                                                                                                                                                                                                                                                                                                                                                                                                                                                                                                                                                                                                                                                                                                                                                                                                                                                                                                                                                                                                                                                                                                                                                                                                                                                                                                                                                                                                                                                                                                                                                                                                                                                                                                                                                                                                                                                                                                                                                                                                                                                                                                                                                                                                                                                                                                                                                                                                                                                                                                                                                                                                                                                                                                                                                                                                                                                                                                                                                                                                                                                                                                                                                                                                                                                                                                                                                                                                                                                                                                                                                                                                                                                                                                                                                                                                                                                                                                                                                                                                                                                                                                                                                                                                                                                                                                                                                                                                                                                                                                                                                                                                                                                                                                                                                                                                                                                                                                                                                                                                                                                                                                                                                                                                                                                                                                                                                                                                                                                                                                                                                                                                                                                                                                                                                                                                                                                                                                                                                                                                                                                                                                                                                                                                                                                                                                                                                                                                                                                                                                                                                                                                                                                                                                                                                                                                                                                                                                                                                                                                                                                                                                                                                                                                                                                                                                                                                                                                                                                                                                                                                                    | .           | -          | Q           | .           | .          | .           | .           | .          | 89 |
|                    | Mkuzi 1979 (South Africa: Mkuzi Game Reserve-1979) | .                                                                                                                                                                                                                                                                                                                                                                                                                                                                                                                                                                                                                                                                                                                                                                                                                                                                                                                                                                                                                                                                                                                                                                                                                                                                                                                                                                                                                                                                                                                                                                                                                                                                                                                                                                                                                                                                                                                                                                                                                                                                                                                                                                                                                                                                                                                                                                                                                                                                                                                                                                                                                                                                                                                                                                                                                                                                                                                                                                                                                                                                                                                                                                                                                                                                                                                                                                                                                                                                                                                                                                                                                                                                                                                                                                                                                                                                                                                                                                                                                                                                                                                                                                                                                                                                                                                                                                                                                                                                                                                                                                                                                                                                                                                                                                                                                                                                                                                                                                                                                                                                                                                                                                                                                                                                                                                                                                                                                                                                                                                                                                                                                                                                                                                                                                                                                                                                                                                                                                                                                                                                                                                                                                                                                                                                                                                                                                                                                                                                                                                                                                                                                                                                                                                                                                                                                                                                                                                                                                                                                                                                                                                                                                                                                                                                                                                                                                                                                                                                                                                                                                                                                                                                                                                                                                                                                                                                                                                                                                                                                                                                                                                                                                                                                                                                                                                                                                                                                                                                                                                                                                                                                                                                                                                                                                                                                                                                                                                                                                                                                                                                                                                                                                                                                                                                                                                                                                                                                                                                                                                                                                                                                                                                                                                                                                                                                                                                                                                                                                                                                                                                                                                                                                                                                                                                                                                                                                                                                                                    | .           | -          | Q           | .           | .          | .           | .           | .          | 89 |
|                    | NHV (Portugal-1968)                                | .                                                                                                                                                                                                                                                                                                                                                                                                                                                                                                                                                                                                                                                                                                                                                                                                                                                                                                                                                                                                                                                                                                                                                                                                                                                                                                                                                                                                                                                                                                                                                                                                                                                                                                                                                                                                                                                                                                                                                                                                                                                                                                                                                                                                                                                                                                                                                                                                                                                                                                                                                                                                                                                                                                                                                                                                                                                                                                                                                                                                                                                                                                                                                                                                                                                                                                                                                                                                                                                                                                                                                                                                                                                                                                                                                                                                                                                                                                                                                                                                                                                                                                                                                                                                                                                                                                                                                                                                                                                                                                                                                                                                                                                                                                                                                                                                                                                                                                                                                                                                                                                                                                                                                                                                                                                                                                                                                                                                                                                                                                                                                                                                                                                                                                                                                                                                                                                                                                                                                                                                                                                                                                                                                                                                                                                                                                                                                                                                                                                                                                                                                                                                                                                                                                                                                                                                                                                                                                                                                                                                                                                                                                                                                                                                                                                                                                                                                                                                                                                                                                                                                                                                                                                                                                                                                                                                                                                                                                                                                                                                                                                                                                                                                                                                                                                                                                                                                                                                                                                                                                                                                                                                                                                                                                                                                                                                                                                                                                                                                                                                                                                                                                                                                                                                                                                                                                                                                                                                                                                                                                                                                                                                                                                                                                                                                                                                                                                                                                                                                                                                                                                                                                                                                                                                                                                                                                                                                                                                                                                    | .           | -          | Q           | .           | .          | .           | .           | .          | 89 |
|                    | Malawi Lil-20/1 (Malawi: Chalaswa-1983)            | .                                                                                                                                                                                                                                                                                                                                                                                                                                                                                                                                                                                                                                                                                                                                                                                                                                                                                                                                                                                                                                                                                                                                                                                                                                                                                                                                                                                                                                                                                                                                                                                                                                                                                                                                                                                                                                                                                                                                                                                                                                                                                                                                                                                                                                                                                                                                                                                                                                                                                                                                                                                                                                                                                                                                                                                                                                                                                                                                                                                                                                                                                                                                                                                                                                                                                                                                                                                                                                                                                                                                                                                                                                                                                                                                                                                                                                                                                                                                                                                                                                                                                                                                                                                                                                                                                                                                                                                                                                                                                                                                                                                                                                                                                                                                                                                                                                                                                                                                                                                                                                                                                                                                                                                                                                                                                                                                                                                                                                                                                                                                                                                                                                                                                                                                                                                                                                                                                                                                                                                                                                                                                                                                                                                                                                                                                                                                                                                                                                                                                                                                                                                                                                                                                                                                                                                                                                                                                                                                                                                                                                                                                                                                                                                                                                                                                                                                                                                                                                                                                                                                                                                                                                                                                                                                                                                                                                                                                                                                                                                                                                                                                                                                                                                                                                                                                                                                                                                                                                                                                                                                                                                                                                                                                                                                                                                                                                                                                                                                                                                                                                                                                                                                                                                                                                                                                                                                                                                                                                                                                                                                                                                                                                                                                                                                                                                                                                                                                                                                                                                                                                                                                                                                                                                                                                                                                                                                                                                                                                                    | .           | -          | Q           | .           | .          | .           | .           | .          | 89 |
|                    | Tengani 62 (Malawi: Tengani-1962)                  | .                                                                                                                                                                                                                                                                                                                                                                                                                                                                                                                                                                                                                                                                                                                                                                                                                                                                                                                                                                                                                                                                                                                                                                                                                                                                                                                                                                                                                                                                                                                                                                                                                                                                                                                                                                                                                                                                                                                                                                                                                                                                                                                                                                                                                                                                                                                                                                                                                                                                                                                                                                                                                                                                                                                                                                                                                                                                                                                                                                                                                                                                                                                                                                                                                                                                                                                                                                                                                                                                                                                                                                                                                                                                                                                                                                                                                                                                                                                                                                                                                                                                                                                                                                                                                                                                                                                                                                                                                                                                                                                                                                                                                                                                                                                                                                                                                                                                                                                                                                                                                                                                                                                                                                                                                                                                                                                                                                                                                                                                                                                                                                                                                                                                                                                                                                                                                                                                                                                                                                                                                                                                                                                                                                                                                                                                                                                                                                                                                                                                                                                                                                                                                                                                                                                                                                                                                                                                                                                                                                                                                                                                                                                                                                                                                                                                                                                                                                                                                                                                                                                                                                                                                                                                                                                                                                                                                                                                                                                                                                                                                                                                                                                                                                                                                                                                                                                                                                                                                                                                                                                                                                                                                                                                                                                                                                                                                                                                                                                                                                                                                                                                                                                                                                                                                                                                                                                                                                                                                                                                                                                                                                                                                                                                                                                                                                                                                                                                                                                                                                                                                                                                                                                                                                                                                                                                                                                                                                                                                                                    | .           | -          | Q           | .           | .          | S           | .           | .          | 89 |
| Pretorisuskop/96/4 | (South Africa: Kruger National Park-1996)          | .                                                                                                                                                                                                                                                                                                                                                                                                                                                                                                                                                                                                                                                                                                                                                                                                                                                                                                                                                                                                                                                                                                                                                                                                                                                                                                                                                                                                                                                                                                                                                                                                                                                                                                                                                                                                                                                                                                                                                                                                                                                                                                                                                                                                                                                                                                                                                                                                                                                                                                                                                                                                                                                                                                                                                                                                                                                                                                                                                                                                                                                                                                                                                                                                                                                                                                                                                                                                                                                                                                                                                                                                                                                                                                                                                                                                                                                                                                                                                                                                                                                                                                                                                                                                                                                                                                                                                                                                                                                                                                                                                                                                                                                                                                                                                                                                                                                                                                                                                                                                                                                                                                                                                                                                                                                                                                                                                                                                                                                                                                                                                                                                                                                                                                                                                                                                                                                                                                                                                                                                                                                                                                                                                                                                                                                                                                                                                                                                                                                                                                                                                                                                                                                                                                                                                                                                                                                                                                                                                                                                                                                                                                                                                                                                                                                                                                                                                                                                                                                                                                                                                                                                                                                                                                                                                                                                                                                                                                                                                                                                                                                                                                                                                                                                                                                                                                                                                                                                                                                                                                                                                                                                                                                                                                                                                                                                                                                                                                                                                                                                                                                                                                                                                                                                                                                                                                                                                                                                                                                                                                                                                                                                                                                                                                                                                                                                                                                                                                                                                                                                                                                                                                                                                                                                                                                                                                                                                                                                                                                    | .           | -          | Q           | .           | .          | .           | .           | .          | 89 |
|                    | Warmbaths (South Africa: Warmbaths-1987)           | .                                                                                                                                                                                                                                                                                                                                                                                                                                                                                                                                                                                                                                                                                                                                                                                                                                                                                                                                                                                                                                                                                                                                                                                                                                                                                                                                                                                                                                                                                                                                                                                                                                                                                                                                                                                                                                                                                                                                                                                                                                                                                                                                                                                                                                                                                                                                                                                                                                                                                                                                                                                                                                                                                                                                                                                                                                                                                                                                                                                                                                                                                                                                                                                                                                                                                                                                                                                                                                                                                                                                                                                                                                                                                                                                                                                                                                                                                                                                                                                                                                                                                                                                                                                                                                                                                                                                                                                                                                                                                                                                                                                                                                                                                                                                                                                                                                                                                                                                                                                                                                                                                                                                                                                                                                                                                                                                                                                                                                                                                                                                                                                                                                                                                                                                                                                                                                                                                                                                                                                                                                                                                                                                                                                                                                                                                                                                                                                                                                                                                                                                                                                                                                                                                                                                                                                                                                                                                                                                                                                                                                                                                                                                                                                                                                                                                                                                                                                                                                                                                                                                                                                                                                                                                                                                                                                                                                                                                                                                                                                                                                                                                                                                                                                                                                                                                                                                                                                                                                                                                                                                                                                                                                                                                                                                                                                                                                                                                                                                                                                                                                                                                                                                                                                                                                                                                                                                                                                                                                                                                                                                                                                                                                                                                                                                                                                                                                                                                                                                                                                                                                                                                                                                                                                                                                                                                                                                                                                                                                                    | .           | -          | Q           | .           | .          | .           | .           | .          | 89 |
|                    | Warthog (Namibia-1980)                             | .                                                                                                                                                                                                                                                                                                                                                                                                                                                                                                                                                                                                                                                                                                                                                                                                                                                                                                                                                                                                                                                                                                                                                                                                                                                                                                                                                                                                                                                                                                                                                                                                                                                                                                                                                                                                                                                                                                                                                                                                                                                                                                                                                                                                                                                                                                                                                                                                                                                                                                                                                                                                                                                                                                                                                                                                                                                                                                                                                                                                                                                                                                                                                                                                                                                                                                                                                                                                                                                                                                                                                                                                                                                                                                                                                                                                                                                                                                                                                                                                                                                                                                                                                                                                                                                                                                                                                                                                                                                                                                                                                                                                                                                                                                                                                                                                                                                                                                                                                                                                                                                                                                                                                                                                                                                                                                                                                                                                                                                                                                                                                                                                                                                                                                                                                                                                                                                                                                                                                                                                                                                                                                                                                                                                                                                                                                                                                                                                                                                                                                                                                                                                                                                                                                                                                                                                                                                                                                                                                                                                                                                                                                                                                                                                                                                                                                                                                                                                                                                                                                                                                                                                                                                                                                                                                                                                                                                                                                                                                                                                                                                                                                                                                                                                                                                                                                                                                                                                                                                                                                                                                                                                                                                                                                                                                                                                                                                                                                                                                                                                                                                                                                                                                                                                                                                                                                                                                                                                                                                                                                                                                                                                                                                                                                                                                                                                                                                                                                                                                                                                                                                                                                                                                                                                                                                                                                                                                                                                                                                    | .           | -          | Q           | .           | .          | .           | .           | .          | 89 |
|                    | Ken05/Tk1 (Kenya-2005)                             | .                                                                                                                                                                                                                                                                                                                                                                                                                                                                                                                                                                                                                                                                                                                                                                                                                                                                                                                                                                                                                                                                                                                                                                                                                                                                                                                                                                                                                                                                                                                                                                                                                                                                                                                                                                                                                                                                                                                                                                                                                                                                                                                                                                                                                                                                                                                                                                                                                                                                                                                                                                                                                                                                                                                                                                                                                                                                                                                                                                                                                                                                                                                                                                                                                                                                                                                                                                                                                                                                                                                                                                                                                                                                                                                                                                                                                                                                                                                                                                                                                                                                                                                                                                                                                                                                                                                                                                                                                                                                                                                                                                                                                                                                                                                                                                                                                                                                                                                                                                                                                                                                                                                                                                                                                                                                                                                                                                                                                                                                                                                                                                                                                                                                                                                                                                                                                                                                                                                                                                                                                                                                                                                                                                                                                                                                                                                                                                                                                                                                                                                                                                                                                                                                                                                                                                                                                                                                                                                                                                                                                                                                                                                                                                                                                                                                                                                                                                                                                                                                                                                                                                                                                                                                                                                                                                                                                                                                                                                                                                                                                                                                                                                                                                                                                                                                                                                                                                                                                                                                                                                                                                                                                                                                                                                                                                                                                                                                                                                                                                                                                                                                                                                                                                                                                                                                                                                                                                                                                                                                                                                                                                                                                                                                                                                                                                                                                                                                                                                                                                                                                                                                                                                                                                                                                                                                                                                                                                                                                                                    | .           | S          | Q           | .           | .          | .D          | .           | .          | 90 |
|                    | Ken06.Bus (Kenya-2006)                             | .                                                                                                                                                                                                                                                                                                                                                                                                                                                                                                                                                                                                                                                                                                                                                                                                                                                                                                                                                                                                                                                                                                                                                                                                                                                                                                                                                                                                                                                                                                                                                                                                                                                                                                                                                                                                                                                                                                                                                                                                                                                                                                                                                                                                                                                                                                                                                                                                                                                                                                                                                                                                                                                                                                                                                                                                                                                                                                                                                                                                                                                                                                                                                                                                                                                                                                                                                                                                                                                                                                                                                                                                                                                                                                                                                                                                                                                                                                                                                                                                                                                                                                                                                                                                                                                                                                                                                                                                                                                                                                                                                                                                                                                                                                                                                                                                                                                                                                                                                                                                                                                                                                                                                                                                                                                                                                                                                                                                                                                                                                                                                                                                                                                                                                                                                                                                                                                                                                                                                                                                                                                                                                                                                                                                                                                                                                                                                                                                                                                                                                                                                                                                                                                                                                                                                                                                                                                                                                                                                                                                                                                                                                                                                                                                                                                                                                                                                                                                                                                                                                                                                                                                                                                                                                                                                                                                                                                                                                                                                                                                                                                                                                                                                                                                                                                                                                                                                                                                                                                                                                                                                                                                                                                                                                                                                                                                                                                                                                                                                                                                                                                                                                                                                                                                                                                                                                                                                                                                                                                                                                                                                                                                                                                                                                                                                                                                                                                                                                                                                                                                                                                                                                                                                                                                                                                                                                                                                                                                                                                    | .           | S          | Q           | .           | .          | .D          | .           | .          | 90 |
|                    | Kenya 1950 (Kenya-1950)                            | .                                                                                                                                                                                                                                                                                                                                                                                                                                                                                                                                                                                                                                                                                                                                                                                                                                                                                                                                                                                                                                                                                                                                                                                                                                                                                                                                                                                                                                                                                                                                                                                                                                                                                                                                                                                                                                                                                                                                                                                                                                                                                                                                                                                                                                                                                                                                                                                                                                                                                                                                                                                                                                                                                                                                                                                                                                                                                                                                                                                                                                                                                                                                                                                                                                                                                                                                                                                                                                                                                                                                                                                                                                                                                                                                                                                                                                                                                                                                                                                                                                                                                                                                                                                                                                                                                                                                                                                                                                                                                                                                                                                                                                                                                                                                                                                                                                                                                                                                                                                                                                                                                                                                                                                                                                                                                                                                                                                                                                                                                                                                                                                                                                                                                                                                                                                                                                                                                                                                                                                                                                                                                                                                                                                                                                                                                                                                                                                                                                                                                                                                                                                                                                                                                                                                                                                                                                                                                                                                                                                                                                                                                                                                                                                                                                                                                                                                                                                                                                                                                                                                                                                                                                                                                                                                                                                                                                                                                                                                                                                                                                                                                                                                                                                                                                                                                                                                                                                                                                                                                                                                                                                                                                                                                                                                                                                                                                                                                                                                                                                                                                                                                                                                                                                                                                                                                                                                                                                                                                                                                                                                                                                                                                                                                                                                                                                                                                                                                                                                                                                                                                                                                                                                                                                                                                                                                                                                                                                                                                                    | .           | S          | Q           | .           | .          | .D          | .           | .          | 90 |
|                    | Conservation                                       | <div><div></div><div></div><div></div><div></div><div></div><div></div><div></div><div></div><div></div><div></div><div></div><div></div><div></div><div></div><div></div><div></div><div></div><div></div><div></div><div></div><div></div><div></div><div></div><div></div><div></div><div></div><div></div><div></div><div></div><div></div><div></div><div></div><div></div><div></div><div></div><div></div><div></div><div></div><div></div><div></div><div></div><div></div><div></div><div></div><div></div><div></div><div></div><div></div><div></div><div></div><div></div><div></div><div></div><div></div><div></div><div></div><div></div><div></div><div></div><div></div><div></div><div></div><div></div><div></div><div></div><div></div><div></div><div></div><div></div><div></div><div></div><div></div><div></div><div></div><div></div><div></div><div></div><div></div><div></div><div></div><div></div><div></div><div></div><div></div><div></div><div></div><div></div><div></div><div></div><div></div><div></div><div></div><div></div><div></div><div></div><div></div><div></div><div></div><div></div><div></div><div></div><div></div><div></div><div></div><div></div><div></div><div></div><div></div><div></div><div></div><div></div><div></div><div></div><div></div><div></div><div></div><div></div><div></div><div></div><div></div><div></div><div></div><div></div><div></div><div></div><div></div><div></div><div></div><div></div><div></div><div></div><div></div><div></div><div></div><div></div><div></div><div></div><div></div><div></div><div></div><div></div><div></div><div></div><div></div><div></div><div></div><div></div><div></div><div></div><div></div><div></div><div></div><div></div><div></div><div></div><div></div><div></div><div></div><div></div><div></div><div></div><div></div><div></div><div></div><div></div><div></div><div></div><div></div><div></div><div></div><div></div><div></div><div></div><div></div><div></div><div></div><div></div><div></div><div></div><div></div><div></div><div></div><div></div><div></div><div></div><div></div><div></div><div></div><div></div><div></div><div></div><div></div><div></div><div></div><div></div><div></div><div></div><div></div><div></div><div></div><div></div><div></div><div></div><div></div><div></div><div></div><div></div><div></div><div></div><div></div><div></div><div></div><div></div><div></div><div></div><div></div><div></div><div></div><div></div><div></div><div></div><div></div><div></div><div></div><div></div><div></div><div></div><div></div><div></div><div></div><div></div><div></div><div></div><div></div><div></div><div></div><div></div><div></div><div></div><div></div><div></div><div></div><div></div><div></div><div></div><div></div><div></div><div></div><div></div><div></div><div></div><div></div><div></div><div></div><div></div><div></div><div></div><div></div><div></div><div></div><div></div><div></div><div></div><div></div><div></div><div></div><div></div><div></div><div></div><div></div><div></div><div></div><div></div><div></div><div></div><div></div><div></div><div></div><div></div><div></div><div></div><div></div><div></div><div></div><div></div><div></div><div></div><div></div><div></div><div></div><div></div><div></div><div></div><div></div><div></div><div></div><div></div><div></div><div></div><div></div><div></div><div></div><div></div><div></div><div></div><div></div><div></div><div></div><div></div><div></div><div></div><div></div><div></div><div></div><div></div><div></div><div></div><div></div><div></div><div></div><div></div><div></div><div></div><div></div><div></div><div></div><div></div><div></div><div></div><div></div><div></div><div></div><div></div><div></div><div></div><div></div><div></div><div></div><div></div><div></div><div></div><div></div><div></div><div></div><div></div><div></div><div></div><div></div><div></div><div></div><div></div><div></div><div></div><div></div><div></div><div></div><div></div><div></div><div></div><div></div><div></div><div></div><div></div><div></div><div></div><div></div><div></div><div></div><div></div><div></div><div></div><div></div><div></div><div></div><div></div><div></div><div></div><div></div><div></div><div></div><div></div><div></div><div></div><div></div><div></div><div></div><div></div><div></div><div></div><div></div><div></div><div></div><div></div><div></div><div></div><div></div><div></div><div></div><div></div><div></div><div></div><div></div><div></div><div></div><div></div><div></div><div></div><div></div><div></div><div></div><div></div><div></div><div></div><div></div><div></div><div></div><div></div><div></div><div></div><div></div><div></div><div></div><div></div><div></div><div></div><div></div><div></div><div></div><div></div><div></div><div></div><div></div><div></div><div></div><div></div><div></div><div></div><div></div><div></div><div></div><div></div><div></div><div></div><div></div><div></div><div></div><div></div><div></div><div></div><div></div><div></div><div></div><div></div><div></div><div></div><div></div><div></div><div></div><div></div><div></div><div></div><div></div><div></div><div></div><div></div><div></div><div></div><div></div><div></div><div></div><div></div><div></div><div></div><div></div><div></div><div></div><div></div><div></div><div></div><div></div><div></div><div></div><div></div><div></div><div></div><div></div><div></div><div></div><div></div><div></div><div></div><div></div><div></div><div></div><div></div><div></div><div></div><div></div><div></div><div></div><div></div><div></div><div></div><div></div><div></div><div></div><div></div><div></div><div></div><div></div><div></div><div></div><div></div><div></div><div></div><div></div><div></div><div></div><div></div><div></div><div></div><div></div><div></div><div></div><div></div><div></div><div></div><div></div><div></div><div></div><div></div><div></div><div></div><div></div><div></div><div></div><div></div><div></div><div></div><div></div><div></div><div></div><div></div><div></div><div></div><div></div><div></div><div></div><div></div><div></div><div></div><div></div><div></div><div></div><div></div><div></div><div></div><div></div><div></div><div></div><div></div><div></div><div></div><div></div><div></div><div></div><div></div><div></div><div></div><div></div><div></div><div></div><div></div><div></div><div></div><div></div><div></div><div></div><div></div><div></div><div></div><div></div><div></div><div></div><div></div><div></div><div></div><div></div><div></div><div></div><div></div><div></div><div></div><div></div><div></div><div></div><div></div><div></div><div></div><div></div><div></div><div></div><div></div><div></div><div></div><div></div><div></div><div></div><div></div><div></div><div></div><div></div><div></div><div></div><div></div><div></div><div></div><div></div><div></div><div></div><div></div><div></div><div></div><div></div><div></div><div></div><div></div><div></div><div></div><div></div><div></div><div></div><div></div><div></div><div></div><div></div><div></div><div></div><div></div><div></div><div></div><div></div><div></div><div></div><div></div><div></div><div></div><div></div><div></div><div></div><div></div><div></div><div></div><div></div><div></div><div></div><div></div><div></div><div></div><div></div><div></div><div></div><div></div><div></div><div></div><div></div><div></div><div></div><div></div><div></div><div></div><div></div><div></div><div></div><div></div><div></div><div></div><div></div><div></div><div></div><div></div><div></div><div></div><div></div><div></div><div></div><div></div><div></div><div></div><div></div><div></div><div></div><div></div><div></div><div></div><div></div><div></div><div></div><div></div><div></div><div></div><div></div><div></div><div></div><div></div><div></div><div></div><div></div><div></div><div></div><div></div><div></div><div></div><div></div><div></div><div></div><div></div><div></div><div></div><div></div><div></div><div></div><div></div><div></div><div></div><div></div><div></div><div></div><div></div><div></div><div></div><div></div><div></div><div></div><div></div><div></div><div></div><div></div><div></div><div></div><div></div><div></div><div></div><div></div><div></div><div></div><div></div><div></div><div></div><div></div><div></div><div></div><div></div><div></div><div></div><div></div><div></div><div></div><div></div><div></div><div></div><div></div><div></div><div></div><div></div><div></div><div></div><div></div><div></div><div></div><div></div><div></div><div></div><div></div><div></div><div></div><div></div><div></div><div></div><div></div><div></div><div></div><div></div><div></div><div></div><div></div><div></div><div></div><div></div><div></div><div></div><div></div><div></div><div></div><div></div><div></div><div></div><div></div><div></div><div></div><div></div><div></div><div></div><div></div><div></div><div></div><div></div><div></div><div></div><div></div><div></div><div></div><div></div><div></div><div></div><div></div><div></div><div></div><div></div><div></div><div></div><div></div><div></div><div></div><div></div><div></div><div></div><div></div><div></div><div></div><div></div><div></div><div></div><div></div><div></div><div></div><div></div><div></div><div></div><div></div><div></div><div></div><div></div><div></div><div></div><div></div><div></div><div></div><div></div><div></div><div></div><div></div><div></div><div></div><div></div><div></div><div></div><div></div><div></div><div></div><div></div><div></div><div></div><div></div><div></div><div></div><div></div><div></div><div></div><div></div><div></div><div></div><div></div><div></div><div></div><div></div><div></div><div></div><div></div><div></div><div></div><div></div><div></div><div></div><div></div><div></div><div></div><div></div><div></div><div></div><div></div><div></div><div></div><div></div><div></div><div></div><div></div><div></div><div></div><div></div><div></div><div></div><div></div><div></div><div></div><div></div><div></div><div></div><div></div><div></div><div></div>&lt;</div> |             |            |             |             |            |             |             |            |    |

|                                                              |                                                    |                                                                                                                                                                                                                                                                                                                                                                                                                                                                                                                                                                                                                                                                                                                                                                                                                                                                                                                                                                                                                                                                                                                                                                                                                                                                                                                                                                                                                                                                                                                                                                                                                                                                                                                                                                                                                                                                                                                                                                                                                                                                                                                                                                                                                                                                                                                                                                                                                                                                                                                                                                                                                                                                                                                                                                                                                                                                                                                                                                                                                                                                                                                                                                                                                                                                                                                                                                                                                                                                                                                                                                                                                                                                                                                                                                                                                                                                                                                                                                                                                                                                                                                                                                                                                                                                                                                                                                                                                                                                                                                                                                                                                                                                                                                                                                                                                                                                                                                                                                                                                                                                                                                                                                                                                                                                                                                                                                                                                                                                                                                                                                                                                                                                                                                                                                                                                                                                                                                                                                                                                                                                                                                                                                                                                                                                                                                                                                                                                                                                                                                                                                                                                                                                                                                                                                                                                                                                                                                                                                                                                                                                                                                                                                                                                                                                                                                                                                                                                                                                                                                                                                                                                                                                                                                                                                                                                                                                                                                                                                                                                                                                                                                                                                                                                                                                                                                                                                                                                                                                                                                                                                                                                                                                                                                                                                                                                                                                                                                                                                                                                                                                                                                                                                                                                                                                                                                                                                                                                                                                                                                                                                                                                                                                                                                                                                         |              |             |              |              |             |             |            |             |    |
|--------------------------------------------------------------|----------------------------------------------------|-------------------------------------------------------------------------------------------------------------------------------------------------------------------------------------------------------------------------------------------------------------------------------------------------------------------------------------------------------------------------------------------------------------------------------------------------------------------------------------------------------------------------------------------------------------------------------------------------------------------------------------------------------------------------------------------------------------------------------------------------------------------------------------------------------------------------------------------------------------------------------------------------------------------------------------------------------------------------------------------------------------------------------------------------------------------------------------------------------------------------------------------------------------------------------------------------------------------------------------------------------------------------------------------------------------------------------------------------------------------------------------------------------------------------------------------------------------------------------------------------------------------------------------------------------------------------------------------------------------------------------------------------------------------------------------------------------------------------------------------------------------------------------------------------------------------------------------------------------------------------------------------------------------------------------------------------------------------------------------------------------------------------------------------------------------------------------------------------------------------------------------------------------------------------------------------------------------------------------------------------------------------------------------------------------------------------------------------------------------------------------------------------------------------------------------------------------------------------------------------------------------------------------------------------------------------------------------------------------------------------------------------------------------------------------------------------------------------------------------------------------------------------------------------------------------------------------------------------------------------------------------------------------------------------------------------------------------------------------------------------------------------------------------------------------------------------------------------------------------------------------------------------------------------------------------------------------------------------------------------------------------------------------------------------------------------------------------------------------------------------------------------------------------------------------------------------------------------------------------------------------------------------------------------------------------------------------------------------------------------------------------------------------------------------------------------------------------------------------------------------------------------------------------------------------------------------------------------------------------------------------------------------------------------------------------------------------------------------------------------------------------------------------------------------------------------------------------------------------------------------------------------------------------------------------------------------------------------------------------------------------------------------------------------------------------------------------------------------------------------------------------------------------------------------------------------------------------------------------------------------------------------------------------------------------------------------------------------------------------------------------------------------------------------------------------------------------------------------------------------------------------------------------------------------------------------------------------------------------------------------------------------------------------------------------------------------------------------------------------------------------------------------------------------------------------------------------------------------------------------------------------------------------------------------------------------------------------------------------------------------------------------------------------------------------------------------------------------------------------------------------------------------------------------------------------------------------------------------------------------------------------------------------------------------------------------------------------------------------------------------------------------------------------------------------------------------------------------------------------------------------------------------------------------------------------------------------------------------------------------------------------------------------------------------------------------------------------------------------------------------------------------------------------------------------------------------------------------------------------------------------------------------------------------------------------------------------------------------------------------------------------------------------------------------------------------------------------------------------------------------------------------------------------------------------------------------------------------------------------------------------------------------------------------------------------------------------------------------------------------------------------------------------------------------------------------------------------------------------------------------------------------------------------------------------------------------------------------------------------------------------------------------------------------------------------------------------------------------------------------------------------------------------------------------------------------------------------------------------------------------------------------------------------------------------------------------------------------------------------------------------------------------------------------------------------------------------------------------------------------------------------------------------------------------------------------------------------------------------------------------------------------------------------------------------------------------------------------------------------------------------------------------------------------------------------------------------------------------------------------------------------------------------------------------------------------------------------------------------------------------------------------------------------------------------------------------------------------------------------------------------------------------------------------------------------------------------------------------------------------------------------------------------------------------------------------------------------------------------------------------------------------------------------------------------------------------------------------------------------------------------------------------------------------------------------------------------------------------------------------------------------------------------------------------------------------------------------------------------------------------------------------------------------------------------------------------------------------------------------------------------------------------------------------------------------------------------------------------------------------------------------------------------------------------------------------------------------------------------------------------------------------------------------------------------------------------------------------------------------------------------------------------------------------------------------------------------------------------------------------------------------------------------------------------------------------------------------------------------------------------------------------------------------------------------------------------------------------------------------------------------------------------------------------------------------------------------------------------------------------------------------------------------------------------------------------------------------------------------------------------------------------------|--------------|-------------|--------------|--------------|-------------|-------------|------------|-------------|----|
|                                                              | Ghana2022-62 C475L                                 | MTSLLKTD FN                                                                                                                                                                                                                                                                                                                                                                                                                                                                                                                                                                                                                                                                                                                                                                                                                                                                                                                                                                                                                                                                                                                                                                                                                                                                                                                                                                                                                                                                                                                                                                                                                                                                                                                                                                                                                                                                                                                                                                                                                                                                                                                                                                                                                                                                                                                                                                                                                                                                                                                                                                                                                                                                                                                                                                                                                                                                                                                                                                                                                                                                                                                                                                                                                                                                                                                                                                                                                                                                                                                                                                                                                                                                                                                                                                                                                                                                                                                                                                                                                                                                                                                                                                                                                                                                                                                                                                                                                                                                                                                                                                                                                                                                                                                                                                                                                                                                                                                                                                                                                                                                                                                                                                                                                                                                                                                                                                                                                                                                                                                                                                                                                                                                                                                                                                                                                                                                                                                                                                                                                                                                                                                                                                                                                                                                                                                                                                                                                                                                                                                                                                                                                                                                                                                                                                                                                                                                                                                                                                                                                                                                                                                                                                                                                                                                                                                                                                                                                                                                                                                                                                                                                                                                                                                                                                                                                                                                                                                                                                                                                                                                                                                                                                                                                                                                                                                                                                                                                                                                                                                                                                                                                                                                                                                                                                                                                                                                                                                                                                                                                                                                                                                                                                                                                                                                                                                                                                                                                                                                                                                                                                                                                                                                                                                                                             | VSKYRL IAQK  | REANAVE IEA | ALEVVR EF II | KKKL ILYGG I | A IDYALHLKG | SS IYPEGERP | DFDMFSPNHV | EDAYELAD IL | 90 |
|                                                              | ASFV-G (Georgia-2007) C475L                        | .                                                                                                                                                                                                                                                                                                                                                                                                                                                                                                                                                                                                                                                                                                                                                                                                                                                                                                                                                                                                                                                                                                                                                                                                                                                                                                                                                                                                                                                                                                                                                                                                                                                                                                                                                                                                                                                                                                                                                                                                                                                                                                                                                                                                                                                                                                                                                                                                                                                                                                                                                                                                                                                                                                                                                                                                                                                                                                                                                                                                                                                                                                                                                                                                                                                                                                                                                                                                                                                                                                                                                                                                                                                                                                                                                                                                                                                                                                                                                                                                                                                                                                                                                                                                                                                                                                                                                                                                                                                                                                                                                                                                                                                                                                                                                                                                                                                                                                                                                                                                                                                                                                                                                                                                                                                                                                                                                                                                                                                                                                                                                                                                                                                                                                                                                                                                                                                                                                                                                                                                                                                                                                                                                                                                                                                                                                                                                                                                                                                                                                                                                                                                                                                                                                                                                                                                                                                                                                                                                                                                                                                                                                                                                                                                                                                                                                                                                                                                                                                                                                                                                                                                                                                                                                                                                                                                                                                                                                                                                                                                                                                                                                                                                                                                                                                                                                                                                                                                                                                                                                                                                                                                                                                                                                                                                                                                                                                                                                                                                                                                                                                                                                                                                                                                                                                                                                                                                                                                                                                                                                                                                                                                                                                                                                                                                                       | .            | .           | .            | .            | .           | .           | .          | .           | 90 |
|                                                              | L60 (Portugal-1960)                                | .S                                                                                                                                                                                                                                                                                                                                                                                                                                                                                                                                                                                                                                                                                                                                                                                                                                                                                                                                                                                                                                                                                                                                                                                                                                                                                                                                                                                                                                                                                                                                                                                                                                                                                                                                                                                                                                                                                                                                                                                                                                                                                                                                                                                                                                                                                                                                                                                                                                                                                                                                                                                                                                                                                                                                                                                                                                                                                                                                                                                                                                                                                                                                                                                                                                                                                                                                                                                                                                                                                                                                                                                                                                                                                                                                                                                                                                                                                                                                                                                                                                                                                                                                                                                                                                                                                                                                                                                                                                                                                                                                                                                                                                                                                                                                                                                                                                                                                                                                                                                                                                                                                                                                                                                                                                                                                                                                                                                                                                                                                                                                                                                                                                                                                                                                                                                                                                                                                                                                                                                                                                                                                                                                                                                                                                                                                                                                                                                                                                                                                                                                                                                                                                                                                                                                                                                                                                                                                                                                                                                                                                                                                                                                                                                                                                                                                                                                                                                                                                                                                                                                                                                                                                                                                                                                                                                                                                                                                                                                                                                                                                                                                                                                                                                                                                                                                                                                                                                                                                                                                                                                                                                                                                                                                                                                                                                                                                                                                                                                                                                                                                                                                                                                                                                                                                                                                                                                                                                                                                                                                                                                                                                                                                                                                                                                                                      | .            | .           | .            | .            | .           | .           | .          | .           | 90 |
|                                                              | BA71V (Spain-1971)                                 | .S                                                                                                                                                                                                                                                                                                                                                                                                                                                                                                                                                                                                                                                                                                                                                                                                                                                                                                                                                                                                                                                                                                                                                                                                                                                                                                                                                                                                                                                                                                                                                                                                                                                                                                                                                                                                                                                                                                                                                                                                                                                                                                                                                                                                                                                                                                                                                                                                                                                                                                                                                                                                                                                                                                                                                                                                                                                                                                                                                                                                                                                                                                                                                                                                                                                                                                                                                                                                                                                                                                                                                                                                                                                                                                                                                                                                                                                                                                                                                                                                                                                                                                                                                                                                                                                                                                                                                                                                                                                                                                                                                                                                                                                                                                                                                                                                                                                                                                                                                                                                                                                                                                                                                                                                                                                                                                                                                                                                                                                                                                                                                                                                                                                                                                                                                                                                                                                                                                                                                                                                                                                                                                                                                                                                                                                                                                                                                                                                                                                                                                                                                                                                                                                                                                                                                                                                                                                                                                                                                                                                                                                                                                                                                                                                                                                                                                                                                                                                                                                                                                                                                                                                                                                                                                                                                                                                                                                                                                                                                                                                                                                                                                                                                                                                                                                                                                                                                                                                                                                                                                                                                                                                                                                                                                                                                                                                                                                                                                                                                                                                                                                                                                                                                                                                                                                                                                                                                                                                                                                                                                                                                                                                                                                                                                                                                                      | .            | .           | .            | .            | .           | .           | .          | .           | 90 |
|                                                              | Benin 97/1 (Benin-1997)                            | .S                                                                                                                                                                                                                                                                                                                                                                                                                                                                                                                                                                                                                                                                                                                                                                                                                                                                                                                                                                                                                                                                                                                                                                                                                                                                                                                                                                                                                                                                                                                                                                                                                                                                                                                                                                                                                                                                                                                                                                                                                                                                                                                                                                                                                                                                                                                                                                                                                                                                                                                                                                                                                                                                                                                                                                                                                                                                                                                                                                                                                                                                                                                                                                                                                                                                                                                                                                                                                                                                                                                                                                                                                                                                                                                                                                                                                                                                                                                                                                                                                                                                                                                                                                                                                                                                                                                                                                                                                                                                                                                                                                                                                                                                                                                                                                                                                                                                                                                                                                                                                                                                                                                                                                                                                                                                                                                                                                                                                                                                                                                                                                                                                                                                                                                                                                                                                                                                                                                                                                                                                                                                                                                                                                                                                                                                                                                                                                                                                                                                                                                                                                                                                                                                                                                                                                                                                                                                                                                                                                                                                                                                                                                                                                                                                                                                                                                                                                                                                                                                                                                                                                                                                                                                                                                                                                                                                                                                                                                                                                                                                                                                                                                                                                                                                                                                                                                                                                                                                                                                                                                                                                                                                                                                                                                                                                                                                                                                                                                                                                                                                                                                                                                                                                                                                                                                                                                                                                                                                                                                                                                                                                                                                                                                                                                                                                      | .            | .           | .            | .            | .           | .           | .          | .           | 90 |
|                                                              | E75 (Spain-1975)                                   | .S                                                                                                                                                                                                                                                                                                                                                                                                                                                                                                                                                                                                                                                                                                                                                                                                                                                                                                                                                                                                                                                                                                                                                                                                                                                                                                                                                                                                                                                                                                                                                                                                                                                                                                                                                                                                                                                                                                                                                                                                                                                                                                                                                                                                                                                                                                                                                                                                                                                                                                                                                                                                                                                                                                                                                                                                                                                                                                                                                                                                                                                                                                                                                                                                                                                                                                                                                                                                                                                                                                                                                                                                                                                                                                                                                                                                                                                                                                                                                                                                                                                                                                                                                                                                                                                                                                                                                                                                                                                                                                                                                                                                                                                                                                                                                                                                                                                                                                                                                                                                                                                                                                                                                                                                                                                                                                                                                                                                                                                                                                                                                                                                                                                                                                                                                                                                                                                                                                                                                                                                                                                                                                                                                                                                                                                                                                                                                                                                                                                                                                                                                                                                                                                                                                                                                                                                                                                                                                                                                                                                                                                                                                                                                                                                                                                                                                                                                                                                                                                                                                                                                                                                                                                                                                                                                                                                                                                                                                                                                                                                                                                                                                                                                                                                                                                                                                                                                                                                                                                                                                                                                                                                                                                                                                                                                                                                                                                                                                                                                                                                                                                                                                                                                                                                                                                                                                                                                                                                                                                                                                                                                                                                                                                                                                                                                                      | .            | .           | .            | .            | .           | .           | .          | .           | 90 |
|                                                              | OURT 88/3 (Portugal-1988)                          | .S                                                                                                                                                                                                                                                                                                                                                                                                                                                                                                                                                                                                                                                                                                                                                                                                                                                                                                                                                                                                                                                                                                                                                                                                                                                                                                                                                                                                                                                                                                                                                                                                                                                                                                                                                                                                                                                                                                                                                                                                                                                                                                                                                                                                                                                                                                                                                                                                                                                                                                                                                                                                                                                                                                                                                                                                                                                                                                                                                                                                                                                                                                                                                                                                                                                                                                                                                                                                                                                                                                                                                                                                                                                                                                                                                                                                                                                                                                                                                                                                                                                                                                                                                                                                                                                                                                                                                                                                                                                                                                                                                                                                                                                                                                                                                                                                                                                                                                                                                                                                                                                                                                                                                                                                                                                                                                                                                                                                                                                                                                                                                                                                                                                                                                                                                                                                                                                                                                                                                                                                                                                                                                                                                                                                                                                                                                                                                                                                                                                                                                                                                                                                                                                                                                                                                                                                                                                                                                                                                                                                                                                                                                                                                                                                                                                                                                                                                                                                                                                                                                                                                                                                                                                                                                                                                                                                                                                                                                                                                                                                                                                                                                                                                                                                                                                                                                                                                                                                                                                                                                                                                                                                                                                                                                                                                                                                                                                                                                                                                                                                                                                                                                                                                                                                                                                                                                                                                                                                                                                                                                                                                                                                                                                                                                                                                                      | .            | .           | .            | .            | .           | .           | .          | .           | 90 |
|                                                              | NHV (Portugal-1968)                                | .S                                                                                                                                                                                                                                                                                                                                                                                                                                                                                                                                                                                                                                                                                                                                                                                                                                                                                                                                                                                                                                                                                                                                                                                                                                                                                                                                                                                                                                                                                                                                                                                                                                                                                                                                                                                                                                                                                                                                                                                                                                                                                                                                                                                                                                                                                                                                                                                                                                                                                                                                                                                                                                                                                                                                                                                                                                                                                                                                                                                                                                                                                                                                                                                                                                                                                                                                                                                                                                                                                                                                                                                                                                                                                                                                                                                                                                                                                                                                                                                                                                                                                                                                                                                                                                                                                                                                                                                                                                                                                                                                                                                                                                                                                                                                                                                                                                                                                                                                                                                                                                                                                                                                                                                                                                                                                                                                                                                                                                                                                                                                                                                                                                                                                                                                                                                                                                                                                                                                                                                                                                                                                                                                                                                                                                                                                                                                                                                                                                                                                                                                                                                                                                                                                                                                                                                                                                                                                                                                                                                                                                                                                                                                                                                                                                                                                                                                                                                                                                                                                                                                                                                                                                                                                                                                                                                                                                                                                                                                                                                                                                                                                                                                                                                                                                                                                                                                                                                                                                                                                                                                                                                                                                                                                                                                                                                                                                                                                                                                                                                                                                                                                                                                                                                                                                                                                                                                                                                                                                                                                                                                                                                                                                                                                                                                                                      | .            | .           | .            | .            | .           | .           | .          | .           | 90 |
|                                                              | Mkuzi 1979 (South Africa: Mkuzi Game Reserve-1979) | .S                                                                                                                                                                                                                                                                                                                                                                                                                                                                                                                                                                                                                                                                                                                                                                                                                                                                                                                                                                                                                                                                                                                                                                                                                                                                                                                                                                                                                                                                                                                                                                                                                                                                                                                                                                                                                                                                                                                                                                                                                                                                                                                                                                                                                                                                                                                                                                                                                                                                                                                                                                                                                                                                                                                                                                                                                                                                                                                                                                                                                                                                                                                                                                                                                                                                                                                                                                                                                                                                                                                                                                                                                                                                                                                                                                                                                                                                                                                                                                                                                                                                                                                                                                                                                                                                                                                                                                                                                                                                                                                                                                                                                                                                                                                                                                                                                                                                                                                                                                                                                                                                                                                                                                                                                                                                                                                                                                                                                                                                                                                                                                                                                                                                                                                                                                                                                                                                                                                                                                                                                                                                                                                                                                                                                                                                                                                                                                                                                                                                                                                                                                                                                                                                                                                                                                                                                                                                                                                                                                                                                                                                                                                                                                                                                                                                                                                                                                                                                                                                                                                                                                                                                                                                                                                                                                                                                                                                                                                                                                                                                                                                                                                                                                                                                                                                                                                                                                                                                                                                                                                                                                                                                                                                                                                                                                                                                                                                                                                                                                                                                                                                                                                                                                                                                                                                                                                                                                                                                                                                                                                                                                                                                                                                                                                                                                      | .            | .           | .            | .            | .           | .           | .          | .           | 90 |
|                                                              | Warthog (Namibia-1980)                             | .S . . . P . . .                                                                                                                                                                                                                                                                                                                                                                                                                                                                                                                                                                                                                                                                                                                                                                                                                                                                                                                                                                                                                                                                                                                                                                                                                                                                                                                                                                                                                                                                                                                                                                                                                                                                                                                                                                                                                                                                                                                                                                                                                                                                                                                                                                                                                                                                                                                                                                                                                                                                                                                                                                                                                                                                                                                                                                                                                                                                                                                                                                                                                                                                                                                                                                                                                                                                                                                                                                                                                                                                                                                                                                                                                                                                                                                                                                                                                                                                                                                                                                                                                                                                                                                                                                                                                                                                                                                                                                                                                                                                                                                                                                                                                                                                                                                                                                                                                                                                                                                                                                                                                                                                                                                                                                                                                                                                                                                                                                                                                                                                                                                                                                                                                                                                                                                                                                                                                                                                                                                                                                                                                                                                                                                                                                                                                                                                                                                                                                                                                                                                                                                                                                                                                                                                                                                                                                                                                                                                                                                                                                                                                                                                                                                                                                                                                                                                                                                                                                                                                                                                                                                                                                                                                                                                                                                                                                                                                                                                                                                                                                                                                                                                                                                                                                                                                                                                                                                                                                                                                                                                                                                                                                                                                                                                                                                                                                                                                                                                                                                                                                                                                                                                                                                                                                                                                                                                                                                                                                                                                                                                                                                                                                                                                                                                                                                                                        | .            | .           | .            | .            | .           | .           | .          | .           | 90 |
| Pretorisuskop/96/4 (South Africa: Kruger National Park-1996) |                                                    | .S                                                                                                                                                                                                                                                                                                                                                                                                                                                                                                                                                                                                                                                                                                                                                                                                                                                                                                                                                                                                                                                                                                                                                                                                                                                                                                                                                                                                                                                                                                                                                                                                                                                                                                                                                                                                                                                                                                                                                                                                                                                                                                                                                                                                                                                                                                                                                                                                                                                                                                                                                                                                                                                                                                                                                                                                                                                                                                                                                                                                                                                                                                                                                                                                                                                                                                                                                                                                                                                                                                                                                                                                                                                                                                                                                                                                                                                                                                                                                                                                                                                                                                                                                                                                                                                                                                                                                                                                                                                                                                                                                                                                                                                                                                                                                                                                                                                                                                                                                                                                                                                                                                                                                                                                                                                                                                                                                                                                                                                                                                                                                                                                                                                                                                                                                                                                                                                                                                                                                                                                                                                                                                                                                                                                                                                                                                                                                                                                                                                                                                                                                                                                                                                                                                                                                                                                                                                                                                                                                                                                                                                                                                                                                                                                                                                                                                                                                                                                                                                                                                                                                                                                                                                                                                                                                                                                                                                                                                                                                                                                                                                                                                                                                                                                                                                                                                                                                                                                                                                                                                                                                                                                                                                                                                                                                                                                                                                                                                                                                                                                                                                                                                                                                                                                                                                                                                                                                                                                                                                                                                                                                                                                                                                                                                                                                                      | .            | .           | .            | .            | .           | .           | .          | .           | 90 |
|                                                              | Warmbaths (South Africa: Warmbaths-1987)           | .S . . . P . . .                                                                                                                                                                                                                                                                                                                                                                                                                                                                                                                                                                                                                                                                                                                                                                                                                                                                                                                                                                                                                                                                                                                                                                                                                                                                                                                                                                                                                                                                                                                                                                                                                                                                                                                                                                                                                                                                                                                                                                                                                                                                                                                                                                                                                                                                                                                                                                                                                                                                                                                                                                                                                                                                                                                                                                                                                                                                                                                                                                                                                                                                                                                                                                                                                                                                                                                                                                                                                                                                                                                                                                                                                                                                                                                                                                                                                                                                                                                                                                                                                                                                                                                                                                                                                                                                                                                                                                                                                                                                                                                                                                                                                                                                                                                                                                                                                                                                                                                                                                                                                                                                                                                                                                                                                                                                                                                                                                                                                                                                                                                                                                                                                                                                                                                                                                                                                                                                                                                                                                                                                                                                                                                                                                                                                                                                                                                                                                                                                                                                                                                                                                                                                                                                                                                                                                                                                                                                                                                                                                                                                                                                                                                                                                                                                                                                                                                                                                                                                                                                                                                                                                                                                                                                                                                                                                                                                                                                                                                                                                                                                                                                                                                                                                                                                                                                                                                                                                                                                                                                                                                                                                                                                                                                                                                                                                                                                                                                                                                                                                                                                                                                                                                                                                                                                                                                                                                                                                                                                                                                                                                                                                                                                                                                                                                                                        | .            | .           | .            | .            | .           | .           | .          | .           | 90 |
|                                                              | Tengani 62 (Malawi: Tengani-1962)                  | .S                                                                                                                                                                                                                                                                                                                                                                                                                                                                                                                                                                                                                                                                                                                                                                                                                                                                                                                                                                                                                                                                                                                                                                                                                                                                                                                                                                                                                                                                                                                                                                                                                                                                                                                                                                                                                                                                                                                                                                                                                                                                                                                                                                                                                                                                                                                                                                                                                                                                                                                                                                                                                                                                                                                                                                                                                                                                                                                                                                                                                                                                                                                                                                                                                                                                                                                                                                                                                                                                                                                                                                                                                                                                                                                                                                                                                                                                                                                                                                                                                                                                                                                                                                                                                                                                                                                                                                                                                                                                                                                                                                                                                                                                                                                                                                                                                                                                                                                                                                                                                                                                                                                                                                                                                                                                                                                                                                                                                                                                                                                                                                                                                                                                                                                                                                                                                                                                                                                                                                                                                                                                                                                                                                                                                                                                                                                                                                                                                                                                                                                                                                                                                                                                                                                                                                                                                                                                                                                                                                                                                                                                                                                                                                                                                                                                                                                                                                                                                                                                                                                                                                                                                                                                                                                                                                                                                                                                                                                                                                                                                                                                                                                                                                                                                                                                                                                                                                                                                                                                                                                                                                                                                                                                                                                                                                                                                                                                                                                                                                                                                                                                                                                                                                                                                                                                                                                                                                                                                                                                                                                                                                                                                                                                                                                                                                      | .            | .           | .            | .            | .           | .           | .          | .           | 90 |
|                                                              | Malawi Lil-20/1 (Malawi: Chalaswa-1983)            | .S . . P . . . .                                                                                                                                                                                                                                                                                                                                                                                                                                                                                                                                                                                                                                                                                                                                                                                                                                                                                                                                                                                                                                                                                                                                                                                                                                                                                                                                                                                                                                                                                                                                                                                                                                                                                                                                                                                                                                                                                                                                                                                                                                                                                                                                                                                                                                                                                                                                                                                                                                                                                                                                                                                                                                                                                                                                                                                                                                                                                                                                                                                                                                                                                                                                                                                                                                                                                                                                                                                                                                                                                                                                                                                                                                                                                                                                                                                                                                                                                                                                                                                                                                                                                                                                                                                                                                                                                                                                                                                                                                                                                                                                                                                                                                                                                                                                                                                                                                                                                                                                                                                                                                                                                                                                                                                                                                                                                                                                                                                                                                                                                                                                                                                                                                                                                                                                                                                                                                                                                                                                                                                                                                                                                                                                                                                                                                                                                                                                                                                                                                                                                                                                                                                                                                                                                                                                                                                                                                                                                                                                                                                                                                                                                                                                                                                                                                                                                                                                                                                                                                                                                                                                                                                                                                                                                                                                                                                                                                                                                                                                                                                                                                                                                                                                                                                                                                                                                                                                                                                                                                                                                                                                                                                                                                                                                                                                                                                                                                                                                                                                                                                                                                                                                                                                                                                                                                                                                                                                                                                                                                                                                                                                                                                                                                                                                                                                                        | .            | .           | .            | .            | .           | .           | .          | .           | 90 |
|                                                              | Ken05/Tk1 (Kenya-2005)                             | .S . . P . . . .                                                                                                                                                                                                                                                                                                                                                                                                                                                                                                                                                                                                                                                                                                                                                                                                                                                                                                                                                                                                                                                                                                                                                                                                                                                                                                                                                                                                                                                                                                                                                                                                                                                                                                                                                                                                                                                                                                                                                                                                                                                                                                                                                                                                                                                                                                                                                                                                                                                                                                                                                                                                                                                                                                                                                                                                                                                                                                                                                                                                                                                                                                                                                                                                                                                                                                                                                                                                                                                                                                                                                                                                                                                                                                                                                                                                                                                                                                                                                                                                                                                                                                                                                                                                                                                                                                                                                                                                                                                                                                                                                                                                                                                                                                                                                                                                                                                                                                                                                                                                                                                                                                                                                                                                                                                                                                                                                                                                                                                                                                                                                                                                                                                                                                                                                                                                                                                                                                                                                                                                                                                                                                                                                                                                                                                                                                                                                                                                                                                                                                                                                                                                                                                                                                                                                                                                                                                                                                                                                                                                                                                                                                                                                                                                                                                                                                                                                                                                                                                                                                                                                                                                                                                                                                                                                                                                                                                                                                                                                                                                                                                                                                                                                                                                                                                                                                                                                                                                                                                                                                                                                                                                                                                                                                                                                                                                                                                                                                                                                                                                                                                                                                                                                                                                                                                                                                                                                                                                                                                                                                                                                                                                                                                                                                                                                        | .P           | .           | .            | .            | .           | .           | .          | .           | 90 |
|                                                              | Kenya 1950 (Kenya-1950)                            | .S . . P . . . .                                                                                                                                                                                                                                                                                                                                                                                                                                                                                                                                                                                                                                                                                                                                                                                                                                                                                                                                                                                                                                                                                                                                                                                                                                                                                                                                                                                                                                                                                                                                                                                                                                                                                                                                                                                                                                                                                                                                                                                                                                                                                                                                                                                                                                                                                                                                                                                                                                                                                                                                                                                                                                                                                                                                                                                                                                                                                                                                                                                                                                                                                                                                                                                                                                                                                                                                                                                                                                                                                                                                                                                                                                                                                                                                                                                                                                                                                                                                                                                                                                                                                                                                                                                                                                                                                                                                                                                                                                                                                                                                                                                                                                                                                                                                                                                                                                                                                                                                                                                                                                                                                                                                                                                                                                                                                                                                                                                                                                                                                                                                                                                                                                                                                                                                                                                                                                                                                                                                                                                                                                                                                                                                                                                                                                                                                                                                                                                                                                                                                                                                                                                                                                                                                                                                                                                                                                                                                                                                                                                                                                                                                                                                                                                                                                                                                                                                                                                                                                                                                                                                                                                                                                                                                                                                                                                                                                                                                                                                                                                                                                                                                                                                                                                                                                                                                                                                                                                                                                                                                                                                                                                                                                                                                                                                                                                                                                                                                                                                                                                                                                                                                                                                                                                                                                                                                                                                                                                                                                                                                                                                                                                                                                                                                                                                                        | .P . . Q . . | .           | .            | .            | .           | .           | .          | .           | 90 |
|                                                              | Ken06.Bus (Kenya-2006)                             | .S . . P . . . .                                                                                                                                                                                                                                                                                                                                                                                                                                                                                                                                                                                                                                                                                                                                                                                                                                                                                                                                                                                                                                                                                                                                                                                                                                                                                                                                                                                                                                                                                                                                                                                                                                                                                                                                                                                                                                                                                                                                                                                                                                                                                                                                                                                                                                                                                                                                                                                                                                                                                                                                                                                                                                                                                                                                                                                                                                                                                                                                                                                                                                                                                                                                                                                                                                                                                                                                                                                                                                                                                                                                                                                                                                                                                                                                                                                                                                                                                                                                                                                                                                                                                                                                                                                                                                                                                                                                                                                                                                                                                                                                                                                                                                                                                                                                                                                                                                                                                                                                                                                                                                                                                                                                                                                                                                                                                                                                                                                                                                                                                                                                                                                                                                                                                                                                                                                                                                                                                                                                                                                                                                                                                                                                                                                                                                                                                                                                                                                                                                                                                                                                                                                                                                                                                                                                                                                                                                                                                                                                                                                                                                                                                                                                                                                                                                                                                                                                                                                                                                                                                                                                                                                                                                                                                                                                                                                                                                                                                                                                                                                                                                                                                                                                                                                                                                                                                                                                                                                                                                                                                                                                                                                                                                                                                                                                                                                                                                                                                                                                                                                                                                                                                                                                                                                                                                                                                                                                                                                                                                                                                                                                                                                                                                                                                                                                                        | .P           | .           | .            | .            | .           | .           | .          | .           | 90 |
|                                                              | Conservation                                       | <div><div></div><div></div><div></div><div></div><div></div><div></div><div></div><div></div><div></div><div></div><div></div><div></div><div></div><div></div><div></div><div></div><div></div><div></div><div></div><div></div><div></div><div></div><div></div><div></div><div></div><div></div><div></div><div></div><div></div><div></div><div></div><div></div><div></div><div></div><div></div><div></div><div></div><div></div><div></div><div></div><div></div><div></div><div></div><div></div><div></div><div></div><div></div><div></div><div></div><div></div><div></div><div></div><div></div><div></div><div></div><div></div><div></div><div></div><div></div><div></div><div></div><div></div><div></div><div></div><div></div><div></div><div></div><div></div><div></div><div></div><div></div><div></div><div></div><div></div><div></div><div></div><div></div><div></div><div></div><div></div><div></div><div></div><div></div><div></div><div></div><div></div><div></div><div></div><div></div><div></div><div></div><div></div><div></div><div></div><div></div><div></div><div></div><div></div><div></div><div></div><div></div><div></div><div></div><div></div><div></div><div></div><div></div><div></div><div></div><div></div><div></div><div></div><div></div><div></div><div></div><div></div><div></div><div></div><div></div><div></div><div></div><div></div><div></div><div></div><div></div><div></div><div></div><div></div><div></div><div></div><div></div><div></div><div></div><div></div><div></div><div></div><div></div><div></div><div></div><div></div><div></div><div></div><div></div><div></div><div></div><div></div><div></div><div></div><div></div><div></div><div></div><div></div><div></div><div></div><div></div><div></div><div></div><div></div><div></div><div></div><div></div><div></div><div></div><div></div><div></div><div></div><div></div><div></div><div></div><div></div><div></div><div></div><div></div><div></div><div></div><div></div><div></div><div></div><div></div><div></div><div></div><div></div><div></div><div></div><div></div><div></div><div></div><div></div><div></div><div></div><div></div><div></div><div></div><div></div><div></div><div></div><div></div><div></div><div></div><div></div><div></div><div></div><div></div><div></div><div></div><div></div><div></div><div></div><div></div><div></div><div></div><div></div><div></div><div></div><div></div><div></div><div></div><div></div><div></div><div></div><div></div><div></div><div></div><div></div><div></div><div></div><div></div><div></div><div></div><div></div><div></div><div></div><div></div><div></div><div></div><div></div><div></div><div></div><div></div><div></div><div></div><div></div><div></div><div></div><div></div><div></div><div></div><div></div><div></div><div></div><div></div><div></div><div></div><div></div><div></div><div></div><div></div><div></div><div></div><div></div><div></div><div></div><div></div><div></div><div></div><div></div><div></div><div></div><div></div><div></div><div></div><div></div><div></div><div></div><div></div><div></div><div></div><div></div><div></div><div></div><div></div><div></div><div></div><div></div><div></div><div></div><div></div><div></div><div></div><div></div><div></div><div></div><div></div><div></div><div></div><div></div><div></div><div></div><div></div><div></div><div></div><div></div><div></div><div></div><div></div><div></div><div></div><div></div><div></div><div></div><div></div><div></div><div></div><div></div><div></div><div></div><div></div><div></div><div></div><div></div><div></div><div></div><div></div><div></div><div></div><div></div><div></div><div></div><div></div><div></div><div></div><div></div><div></div><div></div><div></div><div></div><div></div><div></div><div></div><div></div><div></div><div></div><div></div><div></div><div></div><div></div><div></div><div></div><div></div><div></div><div></div><div></div><div></div><div></div><div></div><div></div><div></div><div></div><div></div><div></div><div></div><div></div><div></div><div></div><div></div><div></div><div></div><div></div><div></div><div></div><div></div><div></div><div></div><div></div><div></div><div></div><div></div><div></div><div></div><div></div><div></div><div></div><div></div><div></div><div></div><div></div><div></div><div></div><div></div><div></div><div></div><div></div><div></div><div></div><div></div><div></div><div></div><div></div><div></div><div></div><div></div><div></div><div></div><div></div><div></div><div></div><div></div><div></div><div></div><div></div><div></div><div></div><div></div><div></div><div></div><div></div><div></div><div></div><div></div><div></div><div></div><div></div><div></div><div></div><div></div><div></div><div></div><div></div><div></div><div></div><div></div><div></div><div></div><div></div><div></div><div></div><div></div><div></div><div></div><div></div><div></div><div></div><div></div><div></div><div></div><div></div><div></div><div></div><div></div><div></div><div></div><div></div><div></div><div></div><div></div><div></div><div></div><div></div><div></div><div></div><div></div><div></div><div></div><div></div><div></div><div></div><div></div><div></div><div></div><div></div><div></div><div></div><div></div><div></div><div></div><div></div><div></div><div></div><div></div><div></div><div></div><div></div><div></div><div></div><div></div><div></div><div></div><div></div><div></div><div></div><div></div><div></div><div></div><div></div><div></div><div></div><div></div><div></div><div></div><div></div><div></div><div></div><div></div><div></div><div></div><div></div><div></div><div></div><div></div><div></div><div></div><div></div><div></div><div></div><div></div><div></div><div></div><div></div><div></div><div></div><div></div><div></div><div></div><div></div><div></div><div></div><div></div><div></div><div></div><div></div><div></div><div></div><div></div><div></div><div></div><div></div><div></div><div></div><div></div><div></div><div></div><div></div><div></div><div></div><div></div><div></div><div></div><div></div><div></div><div></div><div></div><div></div><div></div><div></div><div></div><div></div><div></div><div></div><div></div><div></div><div></div><div></div><div></div><div></div><div></div><div></div><div></div><div></div><div></div><div></div><div></div><div></div><div></div><div></div><div></div><div></div><div></div><div></div><div></div><div></div><div></div><div></div><div></div><div></div><div></div><div></div><div></div><div></div><div></div><div></div><div></div><div></div><div></div><div></div><div></div><div></div><div></div><div></div><div></div><div></div><div></div><div></div><div></div><div></div><div></div><div></div><div></div><div></div><div></div><div></div><div></div><div></div><div></div><div></div><div></div><div></div><div></div><div></div><div></div><div></div><div></div><div></div><div></div><div></div><div></div><div></div><div></div><div></div><div></div><div></div><div></div><div></div><div></div><div></div><div></div><div></div><div></div><div></div><div></div><div></div><div></div><div></div><div></div><div></div><div></div><div></div><div></div><div></div><div></div><div></div><div></div><div></div><div></div><div></div><div></div><div></div><div></div><div></div><div></div><div></div><div></div><div></div><div></div><div></div><div></div><div></div><div></div><div></div><div></div><div></div><div></div><div></div><div></div><div></div><div></div><div></div><div></div><div></div><div></div><div></div><div></div><div></div><div></div><div></div><div></div><div></div><div></div><div></div><div></div><div></div><div></div><div></div><div></div><div></div><div></div><div></div><div></div><div></div><div></div><div></div><div></div><div></div><div></div><div></div><div></div><div></div><div></div><div></div><div></div><div></div><div></div><div></div><div></div><div></div><div></div><div></div><div></div><div></div><div></div><div></div><div></div><div></div><div></div><div></div><div></div><div></div><div></div><div></div><div></div><div></div><div></div><div></div><div></div><div></div><div></div><div></div><div></div><div></div><div></div><div></div><div></div><div></div><div></div><div></div><div></div><div></div><div></div><div></div><div></div><div></div><div></div><div></div><div></div><div></div><div></div><div></div><div></div><div></div><div></div><div></div><div></div><div></div><div></div><div></div><div></div><div></div><div></div><div></div><div></div><div></div><div></div><div></div><div></div><div></div><div></div><div></div><div></div><div></div><div></div><div></div><div></div><div></div><div></div><div></div><div></div><div></div><div></div><div></div><div></div><div></div><div></div><div></div><div></div><div></div><div></div><div></div><div></div><div></div><div></div><div></div><div></div><div></div><div></div><div></div><div></div><div></div><div></div><div></div><div></div><div></div><div></div><div></div><div></div><div></div><div></div><div></div><div></div><div></div><div></div><div></div><div></div><div></div><div></div><div></div><div></div><div></div><div></div><div></div><div></div><div></div><div></div><div></div><div></div><div></div><div></div><div></div><div></div><div></div><div></div><div></div><div></div><div></div><div></div><div></div><div></div><div></div><div></div><div></div><div></div><div></div><div></div><div></div></div> |              |             |              |              |             |             |            |             |    |

[illegible]

|                     |                                           |                                          |             |             |             |             |             |             |             |             |            |     |
|---------------------|-------------------------------------------|------------------------------------------|-------------|-------------|-------------|-------------|-------------|-------------|-------------|-------------|------------|-----|
|                     | Ghana                                     | 2022-34,35,40&62_EP424R                  | MSNYYYYYGG  | GRYDWLKTVE  | PTNFLKIGLP  | YQAHPLHLQH  | QATT-PPSIL  | EKFKRADILL  | NEVKAEMDPL  | MLQPETEKKL  | FQILSSIDMF | 89  |
|                     |                                           | ASFV-G_(Georgia-2007)                    | .           | .           | .           | .           | -           | .           | .           | .           | .          | 89  |
|                     |                                           | Warmbaths_(South_Africa: Warmbaths-1987) | .           | .           | .           | .           | -           | .           | .           | .           | .          | 89  |
| Pretorisuskop/96/4_ | (South_Africa: Kruger_National_Park-1996) |                                          | .           | .           | .           | .           | .           | .           | .           | .           | .          | 89  |
|                     |                                           | Warthog_(Namibia-1980)                   | .           | .           | .           | .           | .T-         | .           | .           | .           | .          | 89  |
| Mkuzi_1979_         | (South_Africa: Mkuzi_Game_Reserve-1979)   |                                          | .           | .           | .           | .           | .T          | .           | .           | .           | .G         | 90  |
|                     |                                           | Tengani_62_(Malawi: Tengani-1962)        | .           | .           | .           | .           | -           | .           | .           | .           | .V         | 89  |
|                     |                                           | L60_(Portugal-1960)                      | .           | .           | .           | .           | .T          | .           | .           | .           | .G         | 90  |
|                     |                                           | BA71V_(Spain-1971)                       | .           | .           | .           | .           | .T          | .           | .           | .           | .G         | 90  |
|                     |                                           | Benin_97/1_(Benin-1997)                  | .           | .           | .           | .           | .T          | .           | .           | .           | .G         | 90  |
|                     |                                           | E75_(Spain-1975)                         | .           | .           | .           | .           | .T          | .           | .           | .           | .G         | 90  |
|                     |                                           | OURT_88/3_(Portugal-1988)                | .           | .           | .           | .           | .T          | .           | .           | .           | .G         | 90  |
|                     |                                           | NHV_(Portugal-1968)                      | .           | .           | .           | .           | .T          | .           | .           | .           | .G         | 90  |
|                     |                                           | Malawi_Lil-20/1_(Malawi: Chalaswa-1983)  | .           | .           | .           | .           | -           | .E          | .           | .           | .G         | 89  |
|                     |                                           | Ken05/Tk1_(Kenya-2005)                   | .           | .           | .           | .           | -           | .           | .S          | .           | .V.G       | 89  |
|                     |                                           | Kenya_1950_(Kenya-1950)                  | .           | .           | .           | .           | -           | .           | .S          | .           | .V.G       | 89  |
|                     |                                           | Ken06.Bus_(Kenya-2006)                   | .           | .           | .           | .           | .G-         | .A          | .V          | .S          | .G         | 89  |
|                     |                                           | Conservation                             |             |             |             |             |             |             |             |             |            |     |
|                     |                                           |                                          | 100         | 120         | 140         | 160         | 180         |             |             |             |            |     |
|                     | Ghana                                     | 2022-34,35,40&62_EP424R                  | KGLRKKVEFT  | YNAQIVTNAW  | LKMYELNNTM  | NFNNTSQAFC  | NCELPGGFIS  | A INHFNYTMM | HYPTFSWVAS  | SLYPSSETDA  | LEDHYGLYQC | 179 |
|                     |                                           | ASFV-G_(Georgia-2007)                    | .           | .           | .           | .           | .           | .           | N           | .           | .          | 179 |
|                     |                                           | Warmbaths_(South_Africa: Warmbaths-1987) | .           | .           | .           | .           | .           | .           | N           | .           | .          | 179 |
| Pretorisuskop/96/4_ | (South_Africa: Kruger_National_Park-1996) |                                          | .           | .           | .           | .           | .           | .           | N           | .           | .          | 179 |
|                     |                                           | Warthog_(Namibia-1980)                   | .           | .           | .           | .           | .           | .           | N           | .           | .          | 179 |
| Mkuzi_1979_         | (South_Africa: Mkuzi_Game_Reserve-1979)   |                                          | .           | .           | .           | .           | .           | .           | N           | .           | .          | 180 |
|                     |                                           | Tengani_62_(Malawi: Tengani-1962)        | .           | .           | .           | .           | .           | .           | N           | .           | .          | 179 |
|                     |                                           | L60_(Portugal-1960)                      | .           | .           | .           | .           | .           | .           | N           | .           | .          | 180 |
|                     |                                           | BA71V_(Spain-1971)                       | .           | .           | .           | .           | .           | .           | N           | .           | .          | 180 |
|                     |                                           | Benin_97/1_(Benin-1997)                  | .           | .           | .           | .           | .           | .           | N           | .           | .          | 180 |
|                     |                                           | E75_(Spain-1975)                         | .           | .           | .           | .           | .           | .           | N           | .           | .          | 180 |
|                     |                                           | OURT_88/3_(Portugal-1988)                | .           | .           | .           | .           | .           | .           | N           | .           | .          | 180 |
|                     |                                           | NHV_(Portugal-1968)                      | .           | .           | .           | .           | .           | .           | N           | .           | .          | 180 |
|                     |                                           | Malawi_Lil-20/1_(Malawi: Chalaswa-1983)  | .           | .           | .           | .           | .           | .H          | .S          | N           | .          | 179 |
|                     |                                           | Ken05/Tk1_(Kenya-2005)                   | .           | .           | .           | .           | .           | .H          | .N          | .           | .          | 179 |
|                     |                                           | Kenya_1950_(Kenya-1950)                  | .Y          | .           | .           | .           | .           | .H          | .N          | .           | .          | 179 |
|                     |                                           | Ken06.Bus_(Kenya-2006)                   | .           | .           | .           | .           | .           | .H          | .N          | .           | .          | 179 |
|                     |                                           | Conservation                             |             |             |             |             |             |             |             |             |            |     |
|                     |                                           |                                          | 200         | 220         | 240         | 260         |             |             |             |             |            |     |
|                     | Ghana                                     | 2022-34,35,40&62_EP424R                  | NPDNWLMQSP  | LLKKNIDYNN  | GDVTIASNVK  | NLALRATQRL  | TP IHLYTADG | G INVGHDYNK | QEELNLKLHF  | GQALTGLLSL  | SKGGNMILKH | 269 |
|                     |                                           | ASFV-G_(Georgia-2007)                    | .           | .           | .           | .           | .           | .           | .           | .           | .          | 269 |
|                     |                                           | Warmbaths_(South_Africa: Warmbaths-1987) | .           | .M          | .           | .           | .           | .           | .           | .           | .          | 269 |
| Pretorisuskop/96/4_ | (South_Africa: Kruger_National_Park-1996) |                                          | .           | .M          | .           | .           | .           | .           | .           | .           | .          | 269 |
|                     |                                           | Warthog_(Namibia-1980)                   | .           | .M          | .           | .           | .           | .           | .           | .           | .          | 269 |
| Mkuzi_1979_         | (South_Africa: Mkuzi_Game_Reserve-1979)   |                                          | .           | .M          | .           | .           | .           | .           | .           | .           | .          | 270 |
|                     |                                           | Tengani_62_(Malawi: Tengani-1962)        | .           | .M          | .           | .           | .           | .           | .           | .M          | .          | 269 |
|                     |                                           | L60_(Portugal-1960)                      | .           | .V.D        | .           | .           | .           | .           | .           | .           | .          | 270 |
|                     |                                           | BA71V_(Spain-1971)                       | .           | .V.D        | .           | .           | .           | .           | .           | .           | .          | 270 |
|                     |                                           | Benin_97/1_(Benin-1997)                  | .           | .V.D        | .           | .           | .           | .           | .           | .           | .          | 270 |
|                     |                                           | E75_(Spain-1975)                         | .           | .V.D        | .           | .           | .           | .           | .           | .           | .          | 270 |
|                     |                                           | OURT_88/3_(Portugal-1988)                | .           | .V.D        | .           | .           | .           | .           | .           | .           | .          | 270 |
|                     |                                           | NHV_(Portugal-1968)                      | .           | .V.D        | .           | .           | .           | .           | .           | .           | .          | 270 |
|                     |                                           | Malawi_Lil-20/1_(Malawi: Chalaswa-1983)  | .           | .M          | .           | .           | .           | .           | .           | .           | .          | 269 |
|                     |                                           | Ken05/Tk1_(Kenya-2005)                   | .           | .M          | .           | .           | .K          | .K          | .           | .           | .          | 269 |
|                     |                                           | Kenya_1950_(Kenya-1950)                  | .           | .M          | .           | .           | .K          | .K          | .           | .           | .          | 269 |
|                     |                                           | Ken06.Bus_(Kenya-2006)                   | .           | .M          | .           | .           | .K          | .K          | .           | .           | .          | 269 |
|                     |                                           | Conservation                             |             |             |             |             |             |             |             |             |            |     |
|                     |                                           |                                          | 280         | 300         | 320         | 340         | 360         |             |             |             |            |     |
|                     | Ghana                                     | 2022-34,35,40&62_EP424R                  | YTLNHAF TLS | LICVFSHF FE | ELYITKPTSS  | RPTNSE TYIV | GKNRLRLFTP  | KEEQVLLKRL  | EFFNDT PLVD | LSLYQN LLES | VYFAVETIHL | 359 |
|                     |                                           | ASFV-G_(Georgia-2007)                    | .           | .           | .           | .           | .           | .           | .           | .           | .          | 359 |
|                     |                                           | Warmbaths_(South_Africa: Warmbaths-1987) | .           | .           | .           | .           | .           | .           | .           | .           | .          | 359 |
| Pretorisuskop/96/4_ | (South_Africa: Kruger_National_Park-1996) |                                          | .           | .           | .           | .           | .           | .           | .           | .           | .          | 359 |
|                     |                                           | Warthog_(Namibia-1980)                   | .           | .           | .           | .           | .           | .           | .           | .           | .          | 359 |
| Mkuzi_1979_         | (South_Africa: Mkuzi_Game_Reserve-1979)   |                                          | .           | .           | .           | .           | .           | .           | .           | .           | I          | 360 |
|                     |                                           | Tengani_62_(Malawi: Tengani-1962)        | .           | .           | .           | .           | .           | .           | .           | .           | I          | 359 |
|                     |                                           | L60_(Portugal-1960)                      | .           | .           | .           | .           | .           | I           | .           | .           | I          | 360 |
|                     |                                           | BA71V_(Spain-1971)                       | .           | .           | .           | .           | .           | I           | .           | .           | I          | 360 |
|                     |                                           | Benin_97/1_(Benin-1997)                  | .           | .           | .           | .           | .           | I           | .           | .           | I          | 360 |
|                     |                                           | E75_(Spain-1975)                         | .           | .           | .           | .           | .           | I           | .           | .           | I          | 360 |
|                     |                                           | OURT_88/3_(Portugal-1988)                | .           | .           | .           | .           | .           | I           | .           | .           | I          | 360 |
|                     |                                           | NHV_(Portugal-1968)                      | .           | .           | .           | .           | .           | I           | .           | .           | I          | 360 |
|                     |                                           | Malawi_Lil-20/1_(Malawi: Chalaswa-1983)  | .           | .           | .           | .           | .           | .           | .           | .           | .          | 359 |
|                     |                                           | Ken05/Tk1_(Kenya-2005)                   | .           | .           | .           | .           | .           | .           | .           | .N          | .          | 359 |
|                     |                                           | Kenya_1950_(Kenya-1950)                  | .           | .           | .           | .S          | .           | .           | .           | .           | I          | 359 |
|                     |                                           | Ken06.Bus_(Kenya-2006)                   | .           | .           | .S          | .           | .           | .           | .           | .N          | I          | 359 |
|                     |                                           | Conservation                             |             |             |             |             |             |             |             |             |            |     |
|                     |                                           |                                          | 380         | 400         | 420         |             |             |             |             |             |            |     |
|                     | Ghana                                     | 2022-34,35,40&62_EP424R                  | KQQIEFLNFG  | MKCYRH FYNK | IKLLNDY LAP | KKKIFQDRWR  | VLNKL YVLEK | KHKLKL CAS* | -----       | 419         |            |     |
|                     |                                           | ASFV-G_(Georgia-2007)                    | .           | .           | .           | .           | .           | .           | -----       | 419         |            |     |
|                     |                                           | Warmbaths_(South_Africa: Warmbaths-1987) | .           | .           | .           | .           | .           | .AS         | QGSVA*      | 425         |            |     |
| Pretorisuskop/96/4_ | (South_Africa: Kruger_National_Park-1996) |                                          | .           | .           | .           | .           | .           | .AS         | QGSVA*      | 425         |            |     |
|                     |                                           | Warthog_(Namibia-1980)                   | .           | .           | .           | .           | .           | .AS         | QGSVA*      | 425         |            |     |
| Mkuzi_1979_         | (South_Africa: Mkuzi_Game_Reserve-1979)   |                                          | .           | .           | .           | .           | .           | .S          | QGSVA*      | 425         |            |     |
|                     |                                           | Tengani_62_(Malawi: Tengani-1962)        | .           | .           | .           | .           | .           | .S          | QGSVA*      | 424         |            |     |
|                     |                                           | L60_(Portugal-1960)                      | .           | .           | .E          | .           | .           | .P          | QGSVA*      | 425         |            |     |
|                     |                                           | BA71V_(Spain-1971)                       | .           | .           | .E          | .           | .           | .P          | QGSVA*      | 425         |            |     |
|                     |                                           | Benin_97/1_(Benin-1997)                  | .           | .           | .E          | .           | .           | .P          | QGSVA*      | 425         |            |     |
|                     |                                           | E75_(Spain-1975)                         | .           | .           | .E          | .           | .           | .P          | QGSVA*      | 425         |            |     |
|                     |                                           | OURT_88/3_(Portugal-1988)                | .           | .           | .E          | .           | .           | .P          | QGSVA*      | 425         |            |     |
|                     |                                           | NHV_(Portugal-1968)                      | .           | .           | .E          | .           | .           | .P          | QGSVA*      | 425         |            |     |
|                     |                                           | Malawi_Lil-20/1_(Malawi: Chalaswa-1983)  | .           | .           | .E          | .           | .           | .PL         | QGSVA*      | 425         |            |     |
|                     |                                           | Ken05/Tk1_(Kenya-2005)                   | .           | .           | .E          | .           | .           | .T.F        | QGSVA*      | 425         |            |     |
|                     |                                           | Kenya_1950_(Kenya-1950)                  | .           | .           | .E          | .           | .           | .T.F        | QGSVA*      | 425         |            |     |
|                     |                                           | Ken06.Bus_(Kenya-2006)                   | .           | .           | .E          | .           | .           | .T.F        | QGSVV*      | 425         |            |     |
|                     |                                           | Conservation                             |             |             |             |             |             |             |             |             |            |     |

|  |                                                              |                                                                                                                                                                                                                                                                                                                                                                                                                                                                                                                                                                                                                                                                                                                                                                                                                                                                                                                                                                                                                                                                                                                                                                                                                                                                                                                                                                                                                                                                                                                                                                                                                                                                                                                                                                                                                                                                                                                                                                                                                                                                                                                                                                                                                                                                                                                                                                                                                                                                                                                                                                                                                                                                                                                                                                                                                                                                                                                                                                                                                                                                                                                                                                                                                                                                                                                                                                                                                                                                                                                                                                                                                                                                                                                                                                                                                                                                                                                                                                                                                                                                                                                                                                                                                                                                                                                                                                                                                                                                                                                                                                                                                                                                                                                                                                                                                                                                                                                                                                                                                                                                                                                                                                                                                                                                                                                                                                                                                                                                                                                                                                                                                                                                                                                                                                                                                                                                                                                                                                                                                                                                                                                                                                                                                                                                                                                                                                                                                                                                                                                                                                                                                                                                                                                                                                                                                                                                                                                                                                                                                                                                                                                                                                                                                                                                                                                                                                                                                                                                                                                                                                                                                                                                                                                                                                                                                                                                                                                                                                                                                                                                                                                                                                                                                                                                                                                                                                                                                                                                                                                                                                                                                                                                                                                                                                                                                                                                                                                                                                                                                                                                                                                                                                                                                                                                                                                                                                                                                                                                                                                                                                                                                                                                                            |                     |                     |                     |                     |                     |                     |                     |                     |    |
|--|--------------------------------------------------------------|--------------------------------------------------------------------------------------------------------------------------------------------------------------------------------------------------------------------------------------------------------------------------------------------------------------------------------------------------------------------------------------------------------------------------------------------------------------------------------------------------------------------------------------------------------------------------------------------------------------------------------------------------------------------------------------------------------------------------------------------------------------------------------------------------------------------------------------------------------------------------------------------------------------------------------------------------------------------------------------------------------------------------------------------------------------------------------------------------------------------------------------------------------------------------------------------------------------------------------------------------------------------------------------------------------------------------------------------------------------------------------------------------------------------------------------------------------------------------------------------------------------------------------------------------------------------------------------------------------------------------------------------------------------------------------------------------------------------------------------------------------------------------------------------------------------------------------------------------------------------------------------------------------------------------------------------------------------------------------------------------------------------------------------------------------------------------------------------------------------------------------------------------------------------------------------------------------------------------------------------------------------------------------------------------------------------------------------------------------------------------------------------------------------------------------------------------------------------------------------------------------------------------------------------------------------------------------------------------------------------------------------------------------------------------------------------------------------------------------------------------------------------------------------------------------------------------------------------------------------------------------------------------------------------------------------------------------------------------------------------------------------------------------------------------------------------------------------------------------------------------------------------------------------------------------------------------------------------------------------------------------------------------------------------------------------------------------------------------------------------------------------------------------------------------------------------------------------------------------------------------------------------------------------------------------------------------------------------------------------------------------------------------------------------------------------------------------------------------------------------------------------------------------------------------------------------------------------------------------------------------------------------------------------------------------------------------------------------------------------------------------------------------------------------------------------------------------------------------------------------------------------------------------------------------------------------------------------------------------------------------------------------------------------------------------------------------------------------------------------------------------------------------------------------------------------------------------------------------------------------------------------------------------------------------------------------------------------------------------------------------------------------------------------------------------------------------------------------------------------------------------------------------------------------------------------------------------------------------------------------------------------------------------------------------------------------------------------------------------------------------------------------------------------------------------------------------------------------------------------------------------------------------------------------------------------------------------------------------------------------------------------------------------------------------------------------------------------------------------------------------------------------------------------------------------------------------------------------------------------------------------------------------------------------------------------------------------------------------------------------------------------------------------------------------------------------------------------------------------------------------------------------------------------------------------------------------------------------------------------------------------------------------------------------------------------------------------------------------------------------------------------------------------------------------------------------------------------------------------------------------------------------------------------------------------------------------------------------------------------------------------------------------------------------------------------------------------------------------------------------------------------------------------------------------------------------------------------------------------------------------------------------------------------------------------------------------------------------------------------------------------------------------------------------------------------------------------------------------------------------------------------------------------------------------------------------------------------------------------------------------------------------------------------------------------------------------------------------------------------------------------------------------------------------------------------------------------------------------------------------------------------------------------------------------------------------------------------------------------------------------------------------------------------------------------------------------------------------------------------------------------------------------------------------------------------------------------------------------------------------------------------------------------------------------------------------------------------------------------------------------------------------------------------------------------------------------------------------------------------------------------------------------------------------------------------------------------------------------------------------------------------------------------------------------------------------------------------------------------------------------------------------------------------------------------------------------------------------------------------------------------------------------------------------------------------------------------------------------------------------------------------------------------------------------------------------------------------------------------------------------------------------------------------------------------------------------------------------------------------------------------------------------------------------------------------------------------------------------------------------------------------------------------------------------------------------------------------------------------------------------------------------------------------------------------------------------------------------------------------------------------------------------------------------------------------------------------------------------------------------------------------------------------------------------------------------------------------------------------------------------------------------------------------------------------------------------------------------------------------------------------------------------------------------------------------------------------------------------------------------------------------------------------------------------------------------------------------------------------------------------------------------------------------------------------------------------------------------------------------------------------------------------------------------------------------------|---------------------|---------------------|---------------------|---------------------|---------------------|---------------------|---------------------|---------------------|----|
|  | Ghana2022-35,40&62_F334L                                     | M L I F I S N M E E                                                                                                                                                                                                                                                                                                                                                                                                                                                                                                                                                                                                                                                                                                                                                                                                                                                                                                                                                                                                                                                                                                                                                                                                                                                                                                                                                                                                                                                                                                                                                                                                                                                                                                                                                                                                                                                                                                                                                                                                                                                                                                                                                                                                                                                                                                                                                                                                                                                                                                                                                                                                                                                                                                                                                                                                                                                                                                                                                                                                                                                                                                                                                                                                                                                                                                                                                                                                                                                                                                                                                                                                                                                                                                                                                                                                                                                                                                                                                                                                                                                                                                                                                                                                                                                                                                                                                                                                                                                                                                                                                                                                                                                                                                                                                                                                                                                                                                                                                                                                                                                                                                                                                                                                                                                                                                                                                                                                                                                                                                                                                                                                                                                                                                                                                                                                                                                                                                                                                                                                                                                                                                                                                                                                                                                                                                                                                                                                                                                                                                                                                                                                                                                                                                                                                                                                                                                                                                                                                                                                                                                                                                                                                                                                                                                                                                                                                                                                                                                                                                                                                                                                                                                                                                                                                                                                                                                                                                                                                                                                                                                                                                                                                                                                                                                                                                                                                                                                                                                                                                                                                                                                                                                                                                                                                                                                                                                                                                                                                                                                                                                                                                                                                                                                                                                                                                                                                                                                                                                                                                                                                                                                                                                                        | L L I E N S Q R F T | I F P I Q H P E C W | N W Y K K L E S L T | W T A Q E V D M C K | D I D D W E A M P K | P Q R E F Y K Q I L | A F F V V A D E I V | I E N L L T N F M R | 90 |
|  | ASFV-G_(Georgia-2007)                                        | .                                                                                                                                                                                                                                                                                                                                                                                                                                                                                                                                                                                                                                                                                                                                                                                                                                                                                                                                                                                                                                                                                                                                                                                                                                                                                                                                                                                                                                                                                                                                                                                                                                                                                                                                                                                                                                                                                                                                                                                                                                                                                                                                                                                                                                                                                                                                                                                                                                                                                                                                                                                                                                                                                                                                                                                                                                                                                                                                                                                                                                                                                                                                                                                                                                                                                                                                                                                                                                                                                                                                                                                                                                                                                                                                                                                                                                                                                                                                                                                                                                                                                                                                                                                                                                                                                                                                                                                                                                                                                                                                                                                                                                                                                                                                                                                                                                                                                                                                                                                                                                                                                                                                                                                                                                                                                                                                                                                                                                                                                                                                                                                                                                                                                                                                                                                                                                                                                                                                                                                                                                                                                                                                                                                                                                                                                                                                                                                                                                                                                                                                                                                                                                                                                                                                                                                                                                                                                                                                                                                                                                                                                                                                                                                                                                                                                                                                                                                                                                                                                                                                                                                                                                                                                                                                                                                                                                                                                                                                                                                                                                                                                                                                                                                                                                                                                                                                                                                                                                                                                                                                                                                                                                                                                                                                                                                                                                                                                                                                                                                                                                                                                                                                                                                                                                                                                                                                                                                                                                                                                                                                                                                                                                                                                          | .                   | .                   | .                   | .                   | .                   | .                   | .                   | .                   | 90 |
|  | E75_(Spain-1975)                                             | .                                                                                                                                                                                                                                                                                                                                                                                                                                                                                                                                                                                                                                                                                                                                                                                                                                                                                                                                                                                                                                                                                                                                                                                                                                                                                                                                                                                                                                                                                                                                                                                                                                                                                                                                                                                                                                                                                                                                                                                                                                                                                                                                                                                                                                                                                                                                                                                                                                                                                                                                                                                                                                                                                                                                                                                                                                                                                                                                                                                                                                                                                                                                                                                                                                                                                                                                                                                                                                                                                                                                                                                                                                                                                                                                                                                                                                                                                                                                                                                                                                                                                                                                                                                                                                                                                                                                                                                                                                                                                                                                                                                                                                                                                                                                                                                                                                                                                                                                                                                                                                                                                                                                                                                                                                                                                                                                                                                                                                                                                                                                                                                                                                                                                                                                                                                                                                                                                                                                                                                                                                                                                                                                                                                                                                                                                                                                                                                                                                                                                                                                                                                                                                                                                                                                                                                                                                                                                                                                                                                                                                                                                                                                                                                                                                                                                                                                                                                                                                                                                                                                                                                                                                                                                                                                                                                                                                                                                                                                                                                                                                                                                                                                                                                                                                                                                                                                                                                                                                                                                                                                                                                                                                                                                                                                                                                                                                                                                                                                                                                                                                                                                                                                                                                                                                                                                                                                                                                                                                                                                                                                                                                                                                                                                          | .                   | .                   | .                   | .                   | .                   | .                   | .                   | .                   | 90 |
|  | L60_(Portugal-1960)                                          | .                                                                                                                                                                                                                                                                                                                                                                                                                                                                                                                                                                                                                                                                                                                                                                                                                                                                                                                                                                                                                                                                                                                                                                                                                                                                                                                                                                                                                                                                                                                                                                                                                                                                                                                                                                                                                                                                                                                                                                                                                                                                                                                                                                                                                                                                                                                                                                                                                                                                                                                                                                                                                                                                                                                                                                                                                                                                                                                                                                                                                                                                                                                                                                                                                                                                                                                                                                                                                                                                                                                                                                                                                                                                                                                                                                                                                                                                                                                                                                                                                                                                                                                                                                                                                                                                                                                                                                                                                                                                                                                                                                                                                                                                                                                                                                                                                                                                                                                                                                                                                                                                                                                                                                                                                                                                                                                                                                                                                                                                                                                                                                                                                                                                                                                                                                                                                                                                                                                                                                                                                                                                                                                                                                                                                                                                                                                                                                                                                                                                                                                                                                                                                                                                                                                                                                                                                                                                                                                                                                                                                                                                                                                                                                                                                                                                                                                                                                                                                                                                                                                                                                                                                                                                                                                                                                                                                                                                                                                                                                                                                                                                                                                                                                                                                                                                                                                                                                                                                                                                                                                                                                                                                                                                                                                                                                                                                                                                                                                                                                                                                                                                                                                                                                                                                                                                                                                                                                                                                                                                                                                                                                                                                                                                                          | .                   | .                   | .                   | .                   | .                   | .                   | .                   | .                   | 90 |
|  | OURT_88/3_(Portugal-1988)                                    | .                                                                                                                                                                                                                                                                                                                                                                                                                                                                                                                                                                                                                                                                                                                                                                                                                                                                                                                                                                                                                                                                                                                                                                                                                                                                                                                                                                                                                                                                                                                                                                                                                                                                                                                                                                                                                                                                                                                                                                                                                                                                                                                                                                                                                                                                                                                                                                                                                                                                                                                                                                                                                                                                                                                                                                                                                                                                                                                                                                                                                                                                                                                                                                                                                                                                                                                                                                                                                                                                                                                                                                                                                                                                                                                                                                                                                                                                                                                                                                                                                                                                                                                                                                                                                                                                                                                                                                                                                                                                                                                                                                                                                                                                                                                                                                                                                                                                                                                                                                                                                                                                                                                                                                                                                                                                                                                                                                                                                                                                                                                                                                                                                                                                                                                                                                                                                                                                                                                                                                                                                                                                                                                                                                                                                                                                                                                                                                                                                                                                                                                                                                                                                                                                                                                                                                                                                                                                                                                                                                                                                                                                                                                                                                                                                                                                                                                                                                                                                                                                                                                                                                                                                                                                                                                                                                                                                                                                                                                                                                                                                                                                                                                                                                                                                                                                                                                                                                                                                                                                                                                                                                                                                                                                                                                                                                                                                                                                                                                                                                                                                                                                                                                                                                                                                                                                                                                                                                                                                                                                                                                                                                                                                                                                                          | .                   | .                   | .                   | .                   | .                   | .                   | .                   | .                   | 90 |
|  | NHV_(Portugal-1968)                                          | .                                                                                                                                                                                                                                                                                                                                                                                                                                                                                                                                                                                                                                                                                                                                                                                                                                                                                                                                                                                                                                                                                                                                                                                                                                                                                                                                                                                                                                                                                                                                                                                                                                                                                                                                                                                                                                                                                                                                                                                                                                                                                                                                                                                                                                                                                                                                                                                                                                                                                                                                                                                                                                                                                                                                                                                                                                                                                                                                                                                                                                                                                                                                                                                                                                                                                                                                                                                                                                                                                                                                                                                                                                                                                                                                                                                                                                                                                                                                                                                                                                                                                                                                                                                                                                                                                                                                                                                                                                                                                                                                                                                                                                                                                                                                                                                                                                                                                                                                                                                                                                                                                                                                                                                                                                                                                                                                                                                                                                                                                                                                                                                                                                                                                                                                                                                                                                                                                                                                                                                                                                                                                                                                                                                                                                                                                                                                                                                                                                                                                                                                                                                                                                                                                                                                                                                                                                                                                                                                                                                                                                                                                                                                                                                                                                                                                                                                                                                                                                                                                                                                                                                                                                                                                                                                                                                                                                                                                                                                                                                                                                                                                                                                                                                                                                                                                                                                                                                                                                                                                                                                                                                                                                                                                                                                                                                                                                                                                                                                                                                                                                                                                                                                                                                                                                                                                                                                                                                                                                                                                                                                                                                                                                                                                          | .                   | .                   | .                   | .                   | .                   | .                   | .                   | .                   | 90 |
|  | BA71V_(Spain-1971)                                           | .                                                                                                                                                                                                                                                                                                                                                                                                                                                                                                                                                                                                                                                                                                                                                                                                                                                                                                                                                                                                                                                                                                                                                                                                                                                                                                                                                                                                                                                                                                                                                                                                                                                                                                                                                                                                                                                                                                                                                                                                                                                                                                                                                                                                                                                                                                                                                                                                                                                                                                                                                                                                                                                                                                                                                                                                                                                                                                                                                                                                                                                                                                                                                                                                                                                                                                                                                                                                                                                                                                                                                                                                                                                                                                                                                                                                                                                                                                                                                                                                                                                                                                                                                                                                                                                                                                                                                                                                                                                                                                                                                                                                                                                                                                                                                                                                                                                                                                                                                                                                                                                                                                                                                                                                                                                                                                                                                                                                                                                                                                                                                                                                                                                                                                                                                                                                                                                                                                                                                                                                                                                                                                                                                                                                                                                                                                                                                                                                                                                                                                                                                                                                                                                                                                                                                                                                                                                                                                                                                                                                                                                                                                                                                                                                                                                                                                                                                                                                                                                                                                                                                                                                                                                                                                                                                                                                                                                                                                                                                                                                                                                                                                                                                                                                                                                                                                                                                                                                                                                                                                                                                                                                                                                                                                                                                                                                                                                                                                                                                                                                                                                                                                                                                                                                                                                                                                                                                                                                                                                                                                                                                                                                                                                                                          | .                   | .                   | .                   | .                   | .                   | .                   | .                   | .                   | 90 |
|  | Benin_97/1_(Benin-1997)                                      | - - - - - .                                                                                                                                                                                                                                                                                                                                                                                                                                                                                                                                                                                                                                                                                                                                                                                                                                                                                                                                                                                                                                                                                                                                                                                                                                                                                                                                                                                                                                                                                                                                                                                                                                                                                                                                                                                                                                                                                                                                                                                                                                                                                                                                                                                                                                                                                                                                                                                                                                                                                                                                                                                                                                                                                                                                                                                                                                                                                                                                                                                                                                                                                                                                                                                                                                                                                                                                                                                                                                                                                                                                                                                                                                                                                                                                                                                                                                                                                                                                                                                                                                                                                                                                                                                                                                                                                                                                                                                                                                                                                                                                                                                                                                                                                                                                                                                                                                                                                                                                                                                                                                                                                                                                                                                                                                                                                                                                                                                                                                                                                                                                                                                                                                                                                                                                                                                                                                                                                                                                                                                                                                                                                                                                                                                                                                                                                                                                                                                                                                                                                                                                                                                                                                                                                                                                                                                                                                                                                                                                                                                                                                                                                                                                                                                                                                                                                                                                                                                                                                                                                                                                                                                                                                                                                                                                                                                                                                                                                                                                                                                                                                                                                                                                                                                                                                                                                                                                                                                                                                                                                                                                                                                                                                                                                                                                                                                                                                                                                                                                                                                                                                                                                                                                                                                                                                                                                                                                                                                                                                                                                                                                                                                                                                                                                | .                   | .                   | .                   | .                   | .                   | .                   | .                   | .                   | 83 |
|  | Mkuzi_1979_(South_Africa:_Mkuzi_Game_Reserve-1979)           | - - - - - .                                                                                                                                                                                                                                                                                                                                                                                                                                                                                                                                                                                                                                                                                                                                                                                                                                                                                                                                                                                                                                                                                                                                                                                                                                                                                                                                                                                                                                                                                                                                                                                                                                                                                                                                                                                                                                                                                                                                                                                                                                                                                                                                                                                                                                                                                                                                                                                                                                                                                                                                                                                                                                                                                                                                                                                                                                                                                                                                                                                                                                                                                                                                                                                                                                                                                                                                                                                                                                                                                                                                                                                                                                                                                                                                                                                                                                                                                                                                                                                                                                                                                                                                                                                                                                                                                                                                                                                                                                                                                                                                                                                                                                                                                                                                                                                                                                                                                                                                                                                                                                                                                                                                                                                                                                                                                                                                                                                                                                                                                                                                                                                                                                                                                                                                                                                                                                                                                                                                                                                                                                                                                                                                                                                                                                                                                                                                                                                                                                                                                                                                                                                                                                                                                                                                                                                                                                                                                                                                                                                                                                                                                                                                                                                                                                                                                                                                                                                                                                                                                                                                                                                                                                                                                                                                                                                                                                                                                                                                                                                                                                                                                                                                                                                                                                                                                                                                                                                                                                                                                                                                                                                                                                                                                                                                                                                                                                                                                                                                                                                                                                                                                                                                                                                                                                                                                                                                                                                                                                                                                                                                                                                                                                                                                | .                   | .                   | .                   | .                   | .                   | .S.                 | .                   | .                   | 83 |
|  | Tengani_62_(Malawi:_Tengani-1962)                            | - - - - - .                                                                                                                                                                                                                                                                                                                                                                                                                                                                                                                                                                                                                                                                                                                                                                                                                                                                                                                                                                                                                                                                                                                                                                                                                                                                                                                                                                                                                                                                                                                                                                                                                                                                                                                                                                                                                                                                                                                                                                                                                                                                                                                                                                                                                                                                                                                                                                                                                                                                                                                                                                                                                                                                                                                                                                                                                                                                                                                                                                                                                                                                                                                                                                                                                                                                                                                                                                                                                                                                                                                                                                                                                                                                                                                                                                                                                                                                                                                                                                                                                                                                                                                                                                                                                                                                                                                                                                                                                                                                                                                                                                                                                                                                                                                                                                                                                                                                                                                                                                                                                                                                                                                                                                                                                                                                                                                                                                                                                                                                                                                                                                                                                                                                                                                                                                                                                                                                                                                                                                                                                                                                                                                                                                                                                                                                                                                                                                                                                                                                                                                                                                                                                                                                                                                                                                                                                                                                                                                                                                                                                                                                                                                                                                                                                                                                                                                                                                                                                                                                                                                                                                                                                                                                                                                                                                                                                                                                                                                                                                                                                                                                                                                                                                                                                                                                                                                                                                                                                                                                                                                                                                                                                                                                                                                                                                                                                                                                                                                                                                                                                                                                                                                                                                                                                                                                                                                                                                                                                                                                                                                                                                                                                                                                                | .                   | .                   | .                   | .                   | .                   | .                   | .M.                 | .                   | 83 |
|  | Warmbaths_(South_Africa:_Warmbaths-1987)                     | - - - - - .                                                                                                                                                                                                                                                                                                                                                                                                                                                                                                                                                                                                                                                                                                                                                                                                                                                                                                                                                                                                                                                                                                                                                                                                                                                                                                                                                                                                                                                                                                                                                                                                                                                                                                                                                                                                                                                                                                                                                                                                                                                                                                                                                                                                                                                                                                                                                                                                                                                                                                                                                                                                                                                                                                                                                                                                                                                                                                                                                                                                                                                                                                                                                                                                                                                                                                                                                                                                                                                                                                                                                                                                                                                                                                                                                                                                                                                                                                                                                                                                                                                                                                                                                                                                                                                                                                                                                                                                                                                                                                                                                                                                                                                                                                                                                                                                                                                                                                                                                                                                                                                                                                                                                                                                                                                                                                                                                                                                                                                                                                                                                                                                                                                                                                                                                                                                                                                                                                                                                                                                                                                                                                                                                                                                                                                                                                                                                                                                                                                                                                                                                                                                                                                                                                                                                                                                                                                                                                                                                                                                                                                                                                                                                                                                                                                                                                                                                                                                                                                                                                                                                                                                                                                                                                                                                                                                                                                                                                                                                                                                                                                                                                                                                                                                                                                                                                                                                                                                                                                                                                                                                                                                                                                                                                                                                                                                                                                                                                                                                                                                                                                                                                                                                                                                                                                                                                                                                                                                                                                                                                                                                                                                                                                                                | .                   | .H.                 | .                   | .                   | .                   | .                   | .                   | .                   | 83 |
|  | Warthog_(Namibia-1980)                                       | - - - - - .                                                                                                                                                                                                                                                                                                                                                                                                                                                                                                                                                                                                                                                                                                                                                                                                                                                                                                                                                                                                                                                                                                                                                                                                                                                                                                                                                                                                                                                                                                                                                                                                                                                                                                                                                                                                                                                                                                                                                                                                                                                                                                                                                                                                                                                                                                                                                                                                                                                                                                                                                                                                                                                                                                                                                                                                                                                                                                                                                                                                                                                                                                                                                                                                                                                                                                                                                                                                                                                                                                                                                                                                                                                                                                                                                                                                                                                                                                                                                                                                                                                                                                                                                                                                                                                                                                                                                                                                                                                                                                                                                                                                                                                                                                                                                                                                                                                                                                                                                                                                                                                                                                                                                                                                                                                                                                                                                                                                                                                                                                                                                                                                                                                                                                                                                                                                                                                                                                                                                                                                                                                                                                                                                                                                                                                                                                                                                                                                                                                                                                                                                                                                                                                                                                                                                                                                                                                                                                                                                                                                                                                                                                                                                                                                                                                                                                                                                                                                                                                                                                                                                                                                                                                                                                                                                                                                                                                                                                                                                                                                                                                                                                                                                                                                                                                                                                                                                                                                                                                                                                                                                                                                                                                                                                                                                                                                                                                                                                                                                                                                                                                                                                                                                                                                                                                                                                                                                                                                                                                                                                                                                                                                                                                                                | .                   | .                   | .                   | .                   | .                   | .                   | .                   | .                   | 83 |
|  | Pretorisuskop/96/4_(South_Africa:_Kruger_National_Park-1996) | - - - - - .                                                                                                                                                                                                                                                                                                                                                                                                                                                                                                                                                                                                                                                                                                                                                                                                                                                                                                                                                                                                                                                                                                                                                                                                                                                                                                                                                                                                                                                                                                                                                                                                                                                                                                                                                                                                                                                                                                                                                                                                                                                                                                                                                                                                                                                                                                                                                                                                                                                                                                                                                                                                                                                                                                                                                                                                                                                                                                                                                                                                                                                                                                                                                                                                                                                                                                                                                                                                                                                                                                                                                                                                                                                                                                                                                                                                                                                                                                                                                                                                                                                                                                                                                                                                                                                                                                                                                                                                                                                                                                                                                                                                                                                                                                                                                                                                                                                                                                                                                                                                                                                                                                                                                                                                                                                                                                                                                                                                                                                                                                                                                                                                                                                                                                                                                                                                                                                                                                                                                                                                                                                                                                                                                                                                                                                                                                                                                                                                                                                                                                                                                                                                                                                                                                                                                                                                                                                                                                                                                                                                                                                                                                                                                                                                                                                                                                                                                                                                                                                                                                                                                                                                                                                                                                                                                                                                                                                                                                                                                                                                                                                                                                                                                                                                                                                                                                                                                                                                                                                                                                                                                                                                                                                                                                                                                                                                                                                                                                                                                                                                                                                                                                                                                                                                                                                                                                                                                                                                                                                                                                                                                                                                                                                                                | .                   | .H.                 | .                   | .                   | .                   | S.                  | .                   | .                   | 83 |
|  | Malawi_Lil-20/1_(Malawi:_Chalaswa-1983)                      | - - - - - .                                                                                                                                                                                                                                                                                                                                                                                                                                                                                                                                                                                                                                                                                                                                                                                                                                                                                                                                                                                                                                                                                                                                                                                                                                                                                                                                                                                                                                                                                                                                                                                                                                                                                                                                                                                                                                                                                                                                                                                                                                                                                                                                                                                                                                                                                                                                                                                                                                                                                                                                                                                                                                                                                                                                                                                                                                                                                                                                                                                                                                                                                                                                                                                                                                                                                                                                                                                                                                                                                                                                                                                                                                                                                                                                                                                                                                                                                                                                                                                                                                                                                                                                                                                                                                                                                                                                                                                                                                                                                                                                                                                                                                                                                                                                                                                                                                                                                                                                                                                                                                                                                                                                                                                                                                                                                                                                                                                                                                                                                                                                                                                                                                                                                                                                                                                                                                                                                                                                                                                                                                                                                                                                                                                                                                                                                                                                                                                                                                                                                                                                                                                                                                                                                                                                                                                                                                                                                                                                                                                                                                                                                                                                                                                                                                                                                                                                                                                                                                                                                                                                                                                                                                                                                                                                                                                                                                                                                                                                                                                                                                                                                                                                                                                                                                                                                                                                                                                                                                                                                                                                                                                                                                                                                                                                                                                                                                                                                                                                                                                                                                                                                                                                                                                                                                                                                                                                                                                                                                                                                                                                                                                                                                                                                | .                   | .                   | .                   | .M.                 | .                   | .                   | .                   | .                   | 83 |
|  | Ken05/Tk1_(Kenya-2005)                                       | - - - - - .                                                                                                                                                                                                                                                                                                                                                                                                                                                                                                                                                                                                                                                                                                                                                                                                                                                                                                                                                                                                                                                                                                                                                                                                                                                                                                                                                                                                                                                                                                                                                                                                                                                                                                                                                                                                                                                                                                                                                                                                                                                                                                                                                                                                                                                                                                                                                                                                                                                                                                                                                                                                                                                                                                                                                                                                                                                                                                                                                                                                                                                                                                                                                                                                                                                                                                                                                                                                                                                                                                                                                                                                                                                                                                                                                                                                                                                                                                                                                                                                                                                                                                                                                                                                                                                                                                                                                                                                                                                                                                                                                                                                                                                                                                                                                                                                                                                                                                                                                                                                                                                                                                                                                                                                                                                                                                                                                                                                                                                                                                                                                                                                                                                                                                                                                                                                                                                                                                                                                                                                                                                                                                                                                                                                                                                                                                                                                                                                                                                                                                                                                                                                                                                                                                                                                                                                                                                                                                                                                                                                                                                                                                                                                                                                                                                                                                                                                                                                                                                                                                                                                                                                                                                                                                                                                                                                                                                                                                                                                                                                                                                                                                                                                                                                                                                                                                                                                                                                                                                                                                                                                                                                                                                                                                                                                                                                                                                                                                                                                                                                                                                                                                                                                                                                                                                                                                                                                                                                                                                                                                                                                                                                                                                                                | .                   | .D.                 | .                   | .                   | .                   | .                   | .                   | .                   | 83 |
|  | Kenya_1950_(Kenya-1950)                                      | - - - - - .                                                                                                                                                                                                                                                                                                                                                                                                                                                                                                                                                                                                                                                                                                                                                                                                                                                                                                                                                                                                                                                                                                                                                                                                                                                                                                                                                                                                                                                                                                                                                                                                                                                                                                                                                                                                                                                                                                                                                                                                                                                                                                                                                                                                                                                                                                                                                                                                                                                                                                                                                                                                                                                                                                                                                                                                                                                                                                                                                                                                                                                                                                                                                                                                                                                                                                                                                                                                                                                                                                                                                                                                                                                                                                                                                                                                                                                                                                                                                                                                                                                                                                                                                                                                                                                                                                                                                                                                                                                                                                                                                                                                                                                                                                                                                                                                                                                                                                                                                                                                                                                                                                                                                                                                                                                                                                                                                                                                                                                                                                                                                                                                                                                                                                                                                                                                                                                                                                                                                                                                                                                                                                                                                                                                                                                                                                                                                                                                                                                                                                                                                                                                                                                                                                                                                                                                                                                                                                                                                                                                                                                                                                                                                                                                                                                                                                                                                                                                                                                                                                                                                                                                                                                                                                                                                                                                                                                                                                                                                                                                                                                                                                                                                                                                                                                                                                                                                                                                                                                                                                                                                                                                                                                                                                                                                                                                                                                                                                                                                                                                                                                                                                                                                                                                                                                                                                                                                                                                                                                                                                                                                                                                                                                                                | .                   | .D.                 | .                   | .                   | .                   | .                   | .                   | .                   | 83 |
|  | Ken06.Bus_(Kenya-2006)                                       | - - - - - .                                                                                                                                                                                                                                                                                                                                                                                                                                                                                                                                                                                                                                                                                                                                                                                                                                                                                                                                                                                                                                                                                                                                                                                                                                                                                                                                                                                                                                                                                                                                                                                                                                                                                                                                                                                                                                                                                                                                                                                                                                                                                                                                                                                                                                                                                                                                                                                                                                                                                                                                                                                                                                                                                                                                                                                                                                                                                                                                                                                                                                                                                                                                                                                                                                                                                                                                                                                                                                                                                                                                                                                                                                                                                                                                                                                                                                                                                                                                                                                                                                                                                                                                                                                                                                                                                                                                                                                                                                                                                                                                                                                                                                                                                                                                                                                                                                                                                                                                                                                                                                                                                                                                                                                                                                                                                                                                                                                                                                                                                                                                                                                                                                                                                                                                                                                                                                                                                                                                                                                                                                                                                                                                                                                                                                                                                                                                                                                                                                                                                                                                                                                                                                                                                                                                                                                                                                                                                                                                                                                                                                                                                                                                                                                                                                                                                                                                                                                                                                                                                                                                                                                                                                                                                                                                                                                                                                                                                                                                                                                                                                                                                                                                                                                                                                                                                                                                                                                                                                                                                                                                                                                                                                                                                                                                                                                                                                                                                                                                                                                                                                                                                                                                                                                                                                                                                                                                                                                                                                                                                                                                                                                                                                                                                | .                   | .                   | .                   | .                   | .M.                 | .                   | .                   | .                   | 83 |
|  | Conservation                                                 | <div><div></div><div></div><div></div><div></div><div></div><div></div><div></div><div></div><div></div><div></div><div></div><div></div><div></div><div></div><div></div><div></div><div></div><div></div><div></div><div></div><div></div><div></div><div></div><div></div><div></div><div></div><div></div><div></div><div></div><div></div><div></div><div></div><div></div><div></div><div></div><div></div><div></div><div></div><div></div><div></div><div></div><div></div><div></div><div></div><div></div><div></div><div></div><div></div><div></div><div></div><div></div><div></div><div></div><div></div><div></div><div></div><div></div><div></div><div></div><div></div><div></div><div></div><div></div><div></div><div></div><div></div><div></div><div></div><div></div><div></div><div></div><div></div><div></div><div></div><div></div><div></div><div></div><div></div><div></div><div></div><div></div><div></div><div></div><div></div><div></div><div></div><div></div><div></div><div></div><div></div><div></div><div></div><div></div><div></div><div></div><div></div><div></div><div></div><div></div><div></div><div></div><div></div><div></div><div></div><div></div><div></div><div></div><div></div><div></div><div></div><div></div><div></div><div></div><div></div><div></div><div></div><div></div><div></div><div></div><div></div><div></div><div></div><div></div><div></div><div></div><div></div><div></div><div></div><div></div><div></div><div></div><div></div><div></div><div></div><div></div><div></div><div></div><div></div><div></div><div></div><div></div><div></div><div></div><div></div><div></div><div></div><div></div><div></div><div></div><div></div><div></div><div></div><div></div><div></div><div></div><div></div><div></div><div></div><div></div><div></div><div></div><div></div><div></div><div></div><div></div><div></div><div></div><div></div><div></div><div></div><div></div><div></div><div></div><div></div><div></div><div></div><div></div><div></div><div></div><div></div><div></div><div></div><div></div><div></div><div></div><div></div><div></div><div></div><div></div><div></div><div></div><div></div><div></div><div></div><div></div><div></div><div></div><div></div><div></div><div></div><div></div><div></div><div></div><div></div><div></div><div></div><div></div><div></div><div></div><div></div><div></div><div></div><div></div><div></div><div></div><div></div><div></div><div></div><div></div><div></div><div></div><div></div><div></div><div></div><div></div><div></div><div></div><div></div><div></div><div></div><div></div><div></div><div></div><div></div><div></div><div></div><div></div><div></div><div></div><div></div><div></div><div></div><div></div><div></div><div></div><div></div><div></div><div></div><div></div><div></div><div></div><div></div><div></div><div></div><div></div><div></div><div></div><div></div><div></div><div></div><div></div><div></div><div></div><div></div><div></div><div></div><div></div><div></div><div></div><div></div><div></div><div></div><div></div><div></div><div></div><div></div><div></div><div></div><div></div><div></div><div></div><div></div><div></div><div></div><div></div><div></div><div></div><div></div><div></div><div></div><div></div><div></div><div></div><div></div><div></div><div></div><div></div><div></div><div></div><div></div><div></div><div></div><div></div><div></div><div></div><div></div><div></div><div></div><div></div><div></div><div></div><div></div><div></div><div></div><div></div><div></div><div></div><div></div><div></div><div></div><div></div><div></div><div></div><div></div><div></div><div></div><div></div><div></div><div></div><div></div><div></div><div></div><div></div><div></div><div></div><div></div><div></div><div></div><div></div><div></div><div></div><div></div><div></div><div></div><div></div><div></div><div></div><div></div><div></div><div></div><div></div><div></div><div></div><div></div><div></div><div></div><div></div><div></div><div></div><div></div><div></div><div></div><div></div><div></div><div></div><div></div><div></div><div></div><div></div><div></div><div></div><div></div><div></div><div></div><div></div><div></div><div></div><div></div><div></div><div></div><div></div><div></div><div></div><div></div><div></div><div></div><div></div><div></div><div></div><div></div><div></div><div></div><div></div><div></div><div></div><div></div><div></div><div></div><div></div><div></div><div></div><div></div><div></div><div></div><div></div><div></div><div></div><div></div><div></div><div></div><div></div><div></div><div></div><div></div><div></div><div></div><div></div><div></div><div></div><div></div><div></div><div></div><div></div><div></div><div></div><div></div><div></div><div></div><div></div><div></div><div></div><div></div><div></div><div></div><div></div><div></div><div></div><div></div><div></div><div></div><div></div><div></div><div></div><div></div><div></div><div></div><div></div><div></div><div></div><div></div><div></div><div></div><div></div><div></div><div></div><div></div><div></div><div></div><div></div><div></div><div></div><div></div><div></div><div></div><div></div><div></div><div></div><div></div><div></div><div></div><div></div><div></div><div></div><div></div><div></div><div></div><div></div><div></div><div></div><div></div><div></div><div></div><div></div><div></div><div></div><div></div><div></div><div></div><div></div><div></div><div></div><div></div><div></div><div></div><div></div><div></div><div></div><div></div><div></div><div></div><div></div><div></div><div></div><div></div><div></div><div></div><div></div><div></div><div></div><div></div><div></div><div></div><div></div><div></div><div></div><div></div><div></div><div></div><div></div><div></div><div></div><div></div><div></div><div></div><div></div><div></div><div></div><div></div><div></div><div></div><div></div><div></div><div></div><div></div><div></div><div></div><div></div><div></div><div></div><div></div><div></div><div></div><div></div><div></div><div></div><div></div><div></div><div></div><div></div><div></div><div></div><div></div><div></div><div></div><div></div><div></div><div></div><div></div><div></div><div></div><div></div><div></div><div></div><div></div><div></div><div></div><div></div><div></div><div></div><div></div><div></div><div></div><div></div><div></div><div></div><div></div><div></div><div></div><div></div><div></div><div></div><div></div><div></div><div></div><div></div><div></div><div></div><div></div><div></div><div></div><div></div><div></div><div></div><div></div><div></div><div></div><div></div><div></div><div></div><div></div><div></div><div></div><div></div><div></div><div></div><div></div><div></div><div></div><div></div><div></div><div></div><div></div><div></div><div></div><div></div><div></div><div></div><div></div><div></div><div></div><div></div><div></div><div></div><div></div><div></div><div></div><div></div><div></div><div></div><div></div><div></div><div></div><div></div><div></div><div></div><div></div><div></div><div></div><div></div><div></div><div></div><div></div><div></div><div></div><div></div><div></div><div></div><div></div><div></div><div></div><div></div><div></div><div></div><div></div><div></div><div></div><div></div><div></div><div></div><div></div><div></div><div></div><div></div><div></div><div></div><div></div><div></div><div></div><div></div><div></div><div></div><div></div><div></div><div></div><div></div><div></div><div></div><div></div><div></div><div></div><div></div><div></div><div></div><div></div><div></div><div></div><div></div><div></div><div></div><div></div><div></div><div></div><div></div><div></div><div></div><div></div><div></div><div></div><div></div><div></div><div></div><div></div><div></div><div></div><div></div><div></div><div></div><div></div><div></div><div></div><div></div><div></div><div></div><div></div><div></div><div></div><div></div><div></div><div></div><div></div><div></div><div></div><div></div><div></div><div></div><div></div><div></div><div></div><div></div><div></div><div></div><div></div><div></div><div></div><div></div><div></div><div></div><div></div><div></div><div></div><div></div><div></div><div></div><div></div><div></div><div></div><div></div><div></div><div></div><div></div><div></div><div></div><div></div><div></div><div></div><div></div><div></div><div></div><div></div><div></div><div></div><div></div><div></div><div></div><div></div><div></div><div></div><div></div><div></div><div></div><div></div><div></div><div></div><div></div><div></div><div></div><div></div><div></div><div></div><div></div><div></div><div></div><div></div><div></div><div></div><div></div><div></div><div></div><div></div><div></div><div></div><div></div><div></div><div></div><div></div><div></div><div></div><div></div><div></div><div></div><div></div><div></div><div></div><div></div><div></div><div></div><div></div><div></div><div></div><div></div><div></div><div></div><div></div><div></div><div></div><div></div><div></div><div></div><div></div><div></div><div></div><div></div><div></div><div></div><div></div><div></div><div></div><div></div><div></div><div></div><div></div><div></div><div></div><div></div><div></div><div></div><div></div><div></div><div></div><div></div><div></div><div></div><div></div><div></div><div></div></div> |                     |                     |                     |                     |                     |                     |                     |                     |    |

[illegible]



|                                                    |                                          |            |            |     |            |      |            |       |         |        |       |            |        |       |       |        |          |         |           |       |           |     |     |
|----------------------------------------------------|------------------------------------------|------------|------------|-----|------------|------|------------|-------|---------|--------|-------|------------|--------|-------|-------|--------|----------|---------|-----------|-------|-----------|-----|-----|
| Mkuzi_1979_(South_Africa:_Mkuzi_Game_Reserve-1979) | Ghana2022-34,35,40&62_KP360L             | MPSTLQALTK | KVLATQPV   | LK  | DDYCILERC  | G    | LWWHEAPIT  | I     | YH      | TCID   | EQ    | IL         | IKTASF | KHGL  | T     | LN     | VALMKAV  | Q       | ENNHGL    | IEL   | FTEWGADIS | F   | 90  |
|                                                    | ASFV-G_(Georgia-2007)_MGF360-1Lb         | .....      | .....      |     | .....      |      | .....      |       |         |        |       |            | .....  |       |       |        |          |         |           |       |           |     | 90  |
|                                                    | ASFV-G_(Georgia-2007)_MGF360-1La         | -----      | -----      |     | -----      |      | -----      |       |         |        |       |            | -----  |       |       |        |          |         |           |       |           |     | -   |
|                                                    | BA71V_(Spain-1971)                       | .....      | .....      | F   | .....      |      | .....      |       | H       |        | K     |            | .....  |       |       |        |          |         |           |       |           |     | 90  |
|                                                    | OURT_88/3_(Portugal-1988)                | .....      | .....      | F   | .....      |      | .....      |       | H       |        | K     |            | .....  |       |       |        |          |         |           |       |           |     | 90  |
|                                                    | Benin_97/1_(Benin-1997)                  | .....      | .....      | F   | .....      |      | .....      |       | H       |        | K     |            | .....  |       |       |        |          |         |           |       |           |     | 90  |
|                                                    | Warmbaths_(South_Africa:_Warmbaths-1987) | .....      | .....      | F   | .....      |      | .....      |       | H       |        | K     |            | V      | ..... |       |        |          |         |           | .D    |           |     | 90  |
|                                                    | Warthog_(Namibia-1980)                   | .....      | .....      | IF  | .....      |      | .....      |       | H       |        | K     |            | V      | ..... |       |        |          |         |           | .D    |           |     | 90  |
|                                                    | Conservation                             |            |            |     |            |      |            |       |         |        |       |            |        |       |       |        |          |         |           |       |           |     |     |
| Mkuzi_1979_(South_Africa:_Mkuzi_Game_Reserve-1979) | Ghana2022-34,35,40&62_KP360L             | GLVTVNMECT | -----      | --- | QDLCQKL    | G    | ARKALSENK  | ILE   | IFYNVQY | VKTSSN | IILC  | HELLSDNPLF | L      | NNAQ  | LKLR  | I      | FGELDTLS | IN      |           |       |           | 167 |     |
|                                                    | ASFV-G_(Georgia-2007)_MGF360-1Lb         | .....      | RTYAKS*    | --- | -----      |      | -----      |       | -----   |        | ----- |            | -----  |       | ----- |        | -----    |         |           |       |           | 107 |     |
|                                                    | ASFV-G_(Georgia-2007)_MGF360-1La         | -----      | .G.R       |     | HQLWVG     | YCQY | GVH        | ..... |         | .....  |       | .....      |        | ..... |       | .....  |          | .....   |           |       |           | 84  |     |
|                                                    | BA71V_(Spain-1971)                       | .....      | -----      |     | -----      |      | -----      |       | .....   |        | ..... |            | .....  |       | ..... |        | .....    |         |           |       |           | 167 |     |
|                                                    | OURT_88/3_(Portugal-1988)                | .....      | -----      |     | -----      |      | -----      |       | .....   |        | ..... |            | .....  |       | ..... |        | .....    |         |           |       |           | 167 |     |
|                                                    | Benin_97/1_(Benin-1997)                  | .....      | -----      |     | -----      |      | -----      |       | .....   |        | ..... |            | .....  |       | ..... |        | .....    |         |           |       |           | 167 |     |
|                                                    | Warmbaths_(South_Africa:_Warmbaths-1987) | .....      | -----      |     | -----      |      | -----      |       |         |        | K     |            |        |       | N     |        |          |         |           | A     |           | 167 |     |
|                                                    | Warthog_(Namibia-1980)                   | .....      | -----      |     | -----      |      | -----      |       |         |        | K     |            |        |       | N     |        |          |         |           | A     |           | 167 |     |
|                                                    | Conservation                             |            |            |     |            |      |            |       |         |        |       |            |        |       |       |        |          |         |           |       |           |     |     |
| Mkuzi_1979_(South_Africa:_Mkuzi_Game_Reserve-1979) | Ghana2022-34,35,40&62_KP360L             | FTLDNISFNE | MLTRYWYSMA |     | ILYKLTEA   | IQ   | YFYQRYSHFK | DWRL  | ICGVAY  | NNVFDL | HEIY  | NKEKTN     | ID     | ID    | EMMQ  | LACMYD | CNYTT    | IYYC    | F         |       |           | 257 |     |
|                                                    | ASFV-G_(Georgia-2007)_MGF360-1Lb         | -----      | -----      |     | -----      |      | -----      |       | -----   |        | ----- |            | -----  |       | ----- |        | -----    |         | -----     |       |           | 107 |     |
|                                                    | ASFV-G_(Georgia-2007)_MGF360-1La         | .....      | .....      |     | .....      |      | .....      |       | .....   |        | ..... |            | .....  |       | ..... |        | .....    |         | .....     |       |           | 174 |     |
|                                                    | BA71V_(Spain-1971)                       | .....      | .....      |     | .....      |      | .....      |       | .....   |        | ..... |            | .....  |       | ..... |        | .....    |         | .....     | .C    |           | 257 |     |
|                                                    | OURT_88/3_(Portugal-1988)                | .....      | .....      |     | .....      |      | .....      |       | .....   |        | ..... |            | .....  |       | ..... |        | .....    |         | .....     | .C    |           | 257 |     |
|                                                    | Benin_97/1_(Benin-1997)                  | .....      | .....      |     | .....      |      | .....      |       | .....   |        | ..... |            | .....  |       | ..... |        | .....    |         | .....     | .C    |           | 257 |     |
|                                                    | Warmbaths_(South_Africa:_Warmbaths-1987) | I          | .....      |     | .....      |      | .....      |       | .....   |        | ..... |            | .....  |       | ..... |        | .....    |         | G         |       | .C        | 257 |     |
|                                                    | Warthog_(Namibia-1980)                   | I          | .....      |     | .....      |      | .....      |       | .....   |        | ..... |            | .....  |       | ..... |        | .....    |         | G         |       | .C        | 257 |     |
|                                                    | Conservation                             |            |            |     |            |      |            |       |         |        |       |            |        |       |       |        |          |         |           |       |           |     |     |
| Mkuzi_1979_(South_Africa:_Mkuzi_Game_Reserve-1979) | Ghana2022-34,35,40&62_KP360L             | MLGADINRAM | ITSVMNFCEG |     | NLFLCIDLGA |      | DAFEESME   | IA    | SQ      | TNNW   | ILIN  | ILLFKN     | YSPD   | SS    | LLS   | IKTTD  | PEK      | INALLDE | EKYKSKNML | I     |           | 347 |     |
|                                                    | ASFV-G_(Georgia-2007)_MGF360-1Lb         | -----      | -----      |     | -----      |      | -----      |       |         |        |       | -----      |        | ----- |       | -----  |          | -----   |           | ----- |           | 107 |     |
|                                                    | ASFV-G_(Georgia-2007)_MGF360-1La         | .....      | .....      |     | .....      |      | .....      |       |         |        |       | .....      |        | ..... |       | .....  |          | .....   |           | ..... |           | 264 |     |
|                                                    | BA71V_(Spain-1971)                       | .....      | .....      |     | .....      |      | .....      |       |         |        |       | .....      |        | ..... |       | .....  |          | .....   |           | ..... |           | 347 |     |
|                                                    | OURT_88/3_(Portugal-1988)                | .....      | .....      |     | .....      |      | .....      |       |         |        |       | .....      |        | ..... |       | .....  |          | .....   |           | ..... |           | 347 |     |
|                                                    | Benin_97/1_(Benin-1997)                  | .....      | .....      |     | .....      |      | .....      |       |         |        |       | .....      |        | ..... |       | .....  |          | .....   |           | ..... |           | 347 |     |
|                                                    | Warmbaths_(South_Africa:_Warmbaths-1987) | .....      | .....      |     | .....      |      |            | K     |         | I      |       |            | A      |       |       |        | L        |         |           |       | M         | 347 |     |
|                                                    | Warthog_(Namibia-1980)                   | .....      | .....      |     | .....      |      |            | K     |         | I      |       |            | A      |       |       |        | L        |         |           | V     |           | M   | 347 |
|                                                    | Conservation                             |            |            |     |            |      |            |       |         |        |       |            |        |       |       |        |          |         |           |       |           |     |     |
| Mkuzi_1979_(South_Africa:_Mkuzi_Game_Reserve-1979) | Ghana2022-34,35,40&62_KP360L             | YEESLFHIYG | VN         | I*  |            | 361  |            |       |         |        |       |            |        |       |       |        |          |         |           |       |           |     |     |
|                                                    | ASFV-G_(Georgia-2007)_MGF360-1Lb         | -----      | ----       |     |            | 107  |            |       |         |        |       |            |        |       |       |        |          |         |           |       |           |     |     |
|                                                    | ASFV-G_(Georgia-2007)_MGF360-1La         | .....      | .....      |     |            | 278  |            |       |         |        |       |            |        |       |       |        |          |         |           |       |           |     |     |
|                                                    | BA71V_(Spain-1971)                       | .....      | .....      |     |            | 361  |            |       |         |        |       |            |        |       |       |        |          |         |           |       |           |     |     |
|                                                    | OURT_88/3_(Portugal-1988)                | .....      | .....      |     |            | 361  |            |       |         |        |       |            |        |       |       |        |          |         |           |       |           |     |     |
|                                                    | Benin_97/1_(Benin-1997)                  | .....      | .....      |     |            | 361  |            |       |         |        |       |            |        |       |       |        |          |         |           |       |           |     |     |
| Mkuzi_1979_(South_Africa:_Mkuzi_Game_Reserve-1979) | Warmbaths_(South_Africa:_Warmbaths-1987) | .....      |            | T.T |            | 361  |            |       |         |        |       |            |        |       |       |        |          |         |           |       |           |     |     |
|                                                    | Warthog_(Namibia-1980)                   | .....      |            | T.T |            | 361  |            |       |         |        |       |            |        |       |       |        |          |         |           |       |           |     |     |
| Mkuzi_1979_(South_Africa:_Mkuzi_Game_Reserve-1979) | Conservation                             |            |            |     |            |      |            |       |         |        |       |            |        |       |       |        |          |         |           |       |           |     |     |



[illegible]

[illegible]

|  |  |  |  |  |  |  |  |  |  |  |  |  |  |  |  |  |  |  |  |  |  |  |  |  |  |  |  |  |  |  |  |  |  |  |  |  |  |  |  |  |  |  |  |  |  |  |  |  |  |  |  |  |  |  |  |  |  |  |  |  |  |  |  |  |  |  |  |  |  |  |  |  |  |  |  |  |  |  |  |  |  |  |  |  |  |  |  |  |  |  |  |  |  |  |  |  |  |  |  |  |  |  |  |  |  |  |  |  |  |  |  |  |  |  |  |  |  |  |  |  |  |  |  |  |  |  |  |  |  |  |  |  |  |  |  |  |  |  |  |  |  |  |  |  |  |  |  |  |  |  |  |  |  |  |  |  |  |  |  |  |  |  |  |  |  |  |  |  |  |  |  |  |  |  |  |  |  |  |  |  |  |  |  |  |  |  |  |  |  |  |  |  |  |  |  |  |  |  |  |  |  |  |  |  |  |  |  |  |  |  |  |  |  |  |  |  |  |  |  |  |  |  |  |  |  |  |  |  |  |  |  |  |  |  |  |  |  |  |  |  |  |  |  |  |  |  |  |  |  |  |  |  |  |  |  |  |  |  |  |  |  |  |  |  |  |  |  |  |  |  |  |  |  |  |  |  |  |  |  |  |  |  |  |  |  |  |  |  |  |  |  |  |  |  |  |  |  |  |  |  |  |  |  |  |  |  |  |  |  |  |  |  |  |  |  |  |  |  |  |  |  |  |  |  |  |  |  |  |  |  |  |  |  |  |  |  |  |  |  |  |  |  |  |  |  |  |  |  |  |  |  |  |  |  |  |  |  |  |  |  |  |  |  |  |  |  |  |  |  |  |  |  |  |  |  |  |  |  |  |  |  |  |  |  |  |  |  |  |  |  |  |  |  |  |  |  |  |  |  |  |  |  |  |  |  |  |  |  |  |  |  |  |  |  |  |  |  |  |  |  |  |  |  |  |  |  |  |  |  |  |  |  |  |  |  |  |  |  |  |  |  |  |  |  |  |  |  |  |  |  |  |  |  |  |  |  |  |  |  |  |  |  |  |  |  |  |  |  |  |  |  |  |  |  |  |  |  |  |  |  |  |  |  |  |  |  |  |  |  |  |  |  |  |  |  |  |  |  |  |  |  |  |  |  |  |  |  |  |  |  |  |  |  |  |  |  |  |  |  |  |  |  |  |  |  |  |  |  |  |  |  |  |  |  |  |  |  |  |  |  |  |  |  |  |  |  |  |  |  |  |  |  |  |  |  |  |  |  |  |  |  |  |  |  |  |  |  |  |  |  |  |  |  |  |  |  |  |  |  |  |  |  |  |  |  |  |  |  |  |  |  |  |  |  |  |  |  |  |  |  |  |  |  |  |  |  |  |  |  |  |  |  |  |  |  |  |  |  |  |  |  |  |  |  |  |  |  |  |  |  |  |  |  |  |  |  |  |  |  |  |  |  |  |  |  |  |  |  |  |  |  |  |  |  |  |  |  |  |  |  |  |  |  |  |  |  |  |  |  |  |  |  |  |  |  |  |  |  |  |  |  |  |  |  |  |  |  |  |  |  |  |  |  |  |  |  |  |  |  |  |  |  |  |  |  |  |  |  |  |  |  |  |  |  |  |  |  |  |  |  |  |  |  |  |  |  |  |  |  |  |  |  |  |  |  |  |  |  |  |  |  |  |  |  |  |  |  |  |  |  |  |  |  |  |  |  |  |  |  |  |  |  |  |  |  |  |  |  |  |  |  |  |  |  |  |  |  |  |  |  |  |  |  |  |  |  |  |  |  |  |  |  |  |  |  |  |  |  |  |  |  |  |  |  |  |  |  |  |  |  |  |  |  |  |  |  |  |  |  |  |  |  |  |  |  |  |  |  |  |  |  |  |  |  |  |  |  |  |  |  |  |  |  |  |  |  |  |  |  |  |  |  |  |  |  |  |  |  |  |  |  |  |  |  |  |  |  |  |  |  |  |  |  |  |  |  |  |  |  |  |  |  |  |  |  |  |  |  |  |  |  |  |  |  |  |  |  |  |  |  |  |  |  |  |  |  |  |  |  |  |  |  |  |  |  |  |  |  |  |  |  |  |  |  |  |  |  |  |  |  |  |  |  |  |  |  |  |  |  |  |  |  |  |  |  |  |  |  |  |  |  |  |  |  |  |  |  |  |  |  |  |  |  |  |  |  |  |  |  |  |  |  |  |  |  |  |  |  |  |  |  |  |  |  |  |  |  |  |  |  |  |  |  |  |  |  |  |  |  |  |  |  |  |  |  |  |  |  |  |  |  |  |  |  |  |  |  |  |  |  |  |  |  |  |  |  |  |  |  |  |  |  |  |  |  |  |  |  |  |  |  |  |  |  |  |  |  |  |  |  |  |  |  |  |  |  |  |  |  |  |  |  |  |  |  |  |  |  |  |  |  |  |  |  |  |  |  |  |  |  |  |  |  |  |  |  |  |  |  |  |  |  |  |  |  |  |  |  |  |  |  |  |  |  |  |  |  |  |  |  |  |  |  |  |  |  |  |  |  |  |  |  |  |  |  |  |  |  |  |  |  |  |  |  |  |  |  |  |  |  |  |  |  |  |  |  |  |  |  |  |  |  |  |  |  |  |  |  |  |  |  |  |  |  |  |  |  |  |  |  |  |  |  |  |  |  |  |  |  |  |  |  |  |  |  |  |  |  |  |  |  |  |  |  |  |  |  |  |  |  |  |  |  |  |  |  |  |  |  |  |  |  |  |  |  |  |  |  |  |  |  |  |  |  |  |  |  |  |  |  |  |  |  |  |  |  |  |  |  |  |  |  |  |  |  |  |  |  |  |  |  |  |  |  |  |  |  |  |  |  |  |  |  |  |  |  |  |  |  |  |  |  |  |  |  |  |  |  |  |  |  |  |  |  |  |  |  |  |  |  |  |  |  |  |  |  |  |  |  |  |  |  |  |  |  |  |  |  |  |  |  |  |  |  |  |  |  |  |  |  |  |  |  |  |  |  |  |  |  |  |  |  |  |  |  |  |  |  |  |  |  |  |  |  |  |  |  |  |  |  |  |  |  |  |  |  |  |  |  |  |  |  |  |  |  |  |  |  |  |  |  |  |  |  |  |  |  |  |  |  |  |  |  |  |  |  |  |  |  |  |  |  |  |  |  |  |  |  |  |  |  |  |  |  |  |  |  |  |  |  |  |  |  |
|--|--|--|--|--|--|--|--|--|--|--|--|--|--|--|--|--|--|--|--|--|--|--|--|--|--|--|--|--|--|--|--|--|--|--|--|--|--|--|--|--|--|--|--|--|--|--|--|--|--|--|--|--|--|--|--|--|--|--|--|--|--|--|--|--|--|--|--|--|--|--|--|--|--|--|--|--|--|--|--|--|--|--|--|--|--|--|--|--|--|--|--|--|--|--|--|--|--|--|--|--|--|--|--|--|--|--|--|--|--|--|--|--|--|--|--|--|--|--|--|--|--|--|--|--|--|--|--|--|--|--|--|--|--|--|--|--|--|--|--|--|--|--|--|--|--|--|--|--|--|--|--|--|--|--|--|--|--|--|--|--|--|--|--|--|--|--|--|--|--|--|--|--|--|--|--|--|--|--|--|--|--|--|--|--|--|--|--|--|--|--|--|--|--|--|--|--|--|--|--|--|--|--|--|--|--|--|--|--|--|--|--|--|--|--|--|--|--|--|--|--|--|--|--|--|--|--|--|--|--|--|--|--|--|--|--|--|--|--|--|--|--|--|--|--|--|--|--|--|--|--|--|--|--|--|--|--|--|--|--|--|--|--|--|--|--|--|--|--|--|--|--|--|--|--|--|--|--|--|--|--|--|--|--|--|--|--|--|--|--|--|--|--|--|--|--|--|--|--|--|--|--|--|--|--|--|--|--|--|--|--|--|--|--|--|--|--|--|--|--|--|--|--|--|--|--|--|--|--|--|--|--|--|--|--|--|--|--|--|--|--|--|--|--|--|--|--|--|--|--|--|--|--|--|--|--|--|--|--|--|--|--|--|--|--|--|--|--|--|--|--|--|--|--|--|--|--|--|--|--|--|--|--|--|--|--|--|--|--|--|--|--|--|--|--|--|--|--|--|--|--|--|--|--|--|--|--|--|--|--|--|--|--|--|--|--|--|--|--|--|--|--|--|--|--|--|--|--|--|--|--|--|--|--|--|--|--|--|--|--|--|--|--|--|--|--|--|--|--|--|--|--|--|--|--|--|--|--|--|--|--|--|--|--|--|--|--|--|--|--|--|--|--|--|--|--|--|--|--|--|--|--|--|--|--|--|--|--|--|--|--|--|--|--|--|--|--|--|--|--|--|--|--|--|--|--|--|--|--|--|--|--|--|--|--|--|--|--|--|--|--|--|--|--|--|--|--|--|--|--|--|--|--|--|--|--|--|--|--|--|--|--|--|--|--|--|--|--|--|--|--|--|--|--|--|--|--|--|--|--|--|--|--|--|--|--|--|--|--|--|--|--|--|--|--|--|--|--|--|--|--|--|--|--|--|--|--|--|--|--|--|--|--|--|--|--|--|--|--|--|--|--|--|--|--|--|--|--|--|--|--|--|--|--|--|--|--|--|--|--|--|--|--|--|--|--|--|--|--|--|--|--|--|--|--|--|--|--|--|--|--|--|--|--|--|--|--|--|--|--|--|--|--|--|--|--|--|--|--|--|--|--|--|--|--|--|--|--|--|--|--|--|--|--|--|--|--|--|--|--|--|--|--|--|--|--|--|--|--|--|--|--|--|--|--|--|--|--|--|--|--|--|--|--|--|--|--|--|--|--|--|--|--|--|--|--|--|--|--|--|--|--|--|--|--|--|--|--|--|--|--|--|--|--|--|--|--|--|--|--|--|--|--|--|--|--|--|--|--|--|--|--|--|--|--|--|--|--|--|--|--|--|--|--|--|--|--|--|--|--|--|--|--|--|--|--|--|--|--|--|--|--|--|--|--|--|--|--|--|--|--|--|--|--|--|--|--|--|--|--|--|--|--|--|--|--|--|--|--|--|--|--|--|--|--|--|--|--|--|--|--|--|--|--|--|--|--|--|--|--|--|--|--|--|--|--|--|--|--|--|--|--|--|--|--|--|--|--|--|--|--|--|--|--|--|--|--|--|--|--|--|--|--|--|--|--|--|--|--|--|--|--|--|--|--|--|--|--|--|--|--|--|--|--|--|--|--|--|--|--|--|--|--|--|--|--|--|--|--|--|--|--|--|--|--|--|--|--|--|--|--|--|--|--|--|--|--|--|--|--|--|--|--|--|--|--|--|--|--|--|--|--|--|--|--|--|--|--|--|--|--|--|--|--|--|--|--|--|--|--|--|--|--|--|--|--|--|--|--|--|--|--|--|--|--|--|--|--|--|--|--|--|--|--|--|--|--|--|--|--|--|--|--|--|--|--|--|--|--|--|--|--|--|--|--|--|--|--|--|--|--|--|--|--|--|--|--|--|--|--|--|--|--|--|--|--|--|--|--|--|--|--|--|--|--|--|--|--|--|--|--|--|--|--|--|--|--|--|--|--|--|--|--|--|--|--|--|--|--|--|--|--|--|--|--|--|--|--|--|--|--|--|--|--|--|--|--|--|--|--|--|--|--|--|--|--|--|--|--|--|--|--|--|--|--|--|--|--|--|--|--|--|--|--|--|--|--|--|--|--|--|--|--|--|--|--|--|--|--|--|--|--|--|--|--|--|--|--|--|--|--|--|--|--|--|--|--|--|--|--|--|--|--|--|--|--|--|--|--|--|--|--|--|--|--|--|--|--|--|--|--|--|--|--|--|--|--|--|--|--|--|--|--|--|--|--|--|--|--|--|--|--|--|--|--|--|--|--|--|--|--|--|--|--|--|--|--|--|--|--|--|--|--|--|--|--|--|--|--|--|--|--|--|--|--|--|--|--|--|--|--|--|--|--|--|--|--|--|--|--|--|--|--|--|--|--|--|--|--|--|--|--|--|--|--|--|--|--|--|--|--|--|--|--|--|--|--|--|--|--|--|--|--|--|--|--|--|--|--|--|--|--|--|--|--|--|--|--|--|--|--|--|--|--|--|--|--|--|--|--|--|--|--|--|--|--|--|--|--|--|--|--|--|--|--|--|--|--|--|--|--|--|--|--|--|--|--|--|--|--|--|--|--|--|--|--|--|--|--|--|--|--|--|--|--|--|--|--|--|--|--|--|--|--|--|--|--|--|--|--|--|--|--|--|--|--|--|--|--|--|--|--|--|--|--|--|--|--|--|--|--|--|--|--|--|--|--|--|--|--|--|--|--|--|--|--|--|--|--|--|--|--|--|--|--|--|--|--|--|--|--|--|--|--|--|--|--|--|--|--|--|--|--|--|--|--|--|--|--|--|--|--|--|--|
|  |  |  |  |  |  |  |  |  |  |  |  |  |  |  |  |  |  |  |  |  |  |  |  |  |  |  |  |  |  |  |  |  |  |  |  |  |  |  |  |  |  |  |  |  |  |  |  |  |  |  |  |  |  |  |  |  |  |  |  |  |  |  |  |  |  |  |  |  |  |  |  |  |  |  |  |  |  |  |  |  |  |  |  |  |  |  |  |  |  |  |  |  |  |  |  |  |  |  |  |  |  |  |  |  |  |  |  |  |  |  |  |  |  |  |  |  |  |  |  |  |  |  |  |  |  |  |  |  |  |  |  |  |  |  |  |  |  |  |  |  |  |  |  |  |  |  |  |  |  |  |  |  |  |  |  |  |  |  |  |  |  |  |  |  |  |  |  |  |  |  |  |  |  |  |  |  |  |  |  |  |  |  |  |  |  |  |  |  |  |  |  |  |  |  |  |  |  |  |  |  |  |  |  |  |  |  |  |  |  |  |  |  |  |  |  |  |  |  |  |  |  |  |  |  |  |  |  |  |  |  |  |  |  |  |  |  |  |  |  |  |  |  |  |  |  |  |  |  |  |  |  |  |  |  |  |  |  |  |  |  |  |  |  |  |  |  |  |  |  |  |  |  |  |  |  |  |  |  |  |  |  |  |  |  |  |  |  |  |  |  |  |  |  |  |  |  |  |  |  |  |  |  |  |  |  |  |  |  |  |  |  |  |  |  |  |  |  |  |  |  |  |  |  |  |  |  |  |  |  |  |  |  |  |  |  |  |  |  |  |  |  |  |  |  |  |  |  |  |  |  |  |  |  |  |  |  |  |  |  |  |  |  |  |  |  |  |  |  |  |  |  |  |  |  |  |  |  |  |  |  |  |  |  |  |  |  |  |  |  |  |  |  |  |  |  |  |  |  |  |  |  |  |  |  |  |  |  |  |  |  |  |  |  |  |  |  |  |  |  |  |  |  |  |  |  |  |  |  |  |  |  |  |  |  |  |  |  |  |  |  |  |  |  |  |  |  |  |  |  |  |  |  |  |  |  |  |  |  |  |  |  |  |  |  |  |  |  |  |  |  |  |  |  |  |  |  |  |  |  |  |  |  |  |  |  |  |  |  |  |  |  |  |  |  |  |  |  |  |  |  |  |  |  |  |  |  |  |  |  |  |  |  |  |  |  |  |  |  |  |  |  |  |  |  |  |  |  |  |  |  |  |  |  |  |  |  |  |  |  |  |  |  |  |  |  |  |  |  |  |  |  |  |  |  |  |  |  |  |  |  |  |  |  |  |  |  |  |  |  |  |  |  |  |  |  |  |  |  |  |  |  |  |  |  |  |  |  |  |  |  |  |  |  |  |  |  |  |  |  |  |  |  |  |  |  |  |  |  |  |  |  |  |  |  |  |  |  |  |  |  |  |  |  |  |  |  |  |  |  |  |  |  |  |  |  |  |  |  |  |  |  |  |  |  |  |  |  |  |  |  |  |  |  |  |  |  |  |  |  |  |  |  |  |  |  |  |  |  |  |  |  |  |  |  |  |  |  |  |  |  |  |  |  |  |  |  |  |  |  |  |  |  |  |  |  |  |  |  |  |  |  |  |  |  |  |  |  |  |  |  |  |  |  |  |  |  |  |  |  |  |  |  |  |  |  |  |  |  |  |  |  |  |  |  |  |  |  |  |  |  |  |  |  |  |  |  |  |  |  |  |  |  |  |  |  |  |  |  |  |  |  |  |  |  |  |  |  |  |  |  |  |  |  |  |  |  |  |  |  |  |  |  |  |  |  |  |  |  |  |  |  |  |  |  |  |  |  |  |  |  |  |  |  |  |  |  |  |  |  |  |  |  |  |  |  |  |  |  |  |  |  |  |  |  |  |  |  |  |  |  |  |  |  |  |  |  |  |  |  |  |  |  |  |  |  |  |  |  |  |  |  |  |  |  |  |  |  |  |  |  |  |  |  |  |  |  |  |  |  |  |  |  |  |  |  |  |  |  |  |  |  |  |  |  |  |  |  |  |  |  |  |  |  |  |  |  |  |  |  |  |  |  |  |  |  |  |  |  |  |  |  |  |  |  |  |  |  |  |  |  |  |  |  |  |  |  |  |  |  |  |  |  |  |  |  |  |  |  |  |  |  |  |  |  |  |  |  |  |  |  |  |  |  |  |  |  |  |  |  |  |  |  |  |  |  |  |  |  |  |  |  |  |  |  |  |  |  |  |  |  |  |  |  |  |  |  |  |  |  |  |  |  |  |  |  |  |  |  |  |  |  |  |  |  |  |  |  |  |  |  |  |  |  |  |  |  |  |  |  |  |  |  |  |  |  |  |  |  |  |  |  |  |  |  |  |  |  |  |  |  |  |  |  |  |  |  |  |  |  |  |  |  |  |  |  |  |  |  |  |  |  |  |  |  |  |  |  |  |  |  |  |  |  |  |  |  |  |  |  |  |  |  |  |  |  |  |  |  |  |  |  |  |  |  |  |  |  |  |  |  |  |  |  |  |  |  |  |  |  |  |  |  |  |  |  |  |  |  |  |  |  |  |  |  |  |  |  |  |  |  |  |  |  |  |  |  |  |  |  |  |  |  |  |  |  |  |  |  |  |  |  |  |  |  |  |  |  |  |  |  |  |  |  |  |  |  |  |  |  |  |  |  |  |  |  |  |  |  |  |  |  |  |  |  |  |  |  |  |  |  |  |  |  |  |  |  |  |  |  |  |  |  |  |  |  |  |  |  |  |  |  |  |  |  |  |  |  |  |  |  |  |  |  |  |  |  |  |  |  |  |  |  |  |  |  |  |  |  |  |  |  |  |  |  |  |  |  |  |  |  |  |  |  |  |  |  |  |  |  |  |  |  |  |  |  |  |  |  |  |  |  |  |  |  |  |  |  |  |  |  |  |  |  |  |  |  |  |  |  |  |  |  |  |  |  |  |  |  |  |  |  |  |  |  |  |  |  |  |  |  |  |  |  |  |  |  |  |  |  |  |  |  |  |  |  |  |  |  |  |  |  |  |  |  |  |  |  |  |  |  |  |  |  |  |  |  |  |  |  |  |  |  |  |  |  |  |  |  |  |  |  |  |  |  |  |  |  |  |  |  |  |  |  |  |  |  |  |  |  |  |  |  |  |  |  |  |  |  |  |  |  |  |  |  |  |  |  |  |  |  |  |  |  |  |  |  |  |  |  |  |  |  |  |
|--|--|--|--|--|--|--|--|--|--|--|--|--|--|--|--|--|--|--|--|--|--|--|--|--|--|--|--|--|--|--|--|--|--|--|--|--|--|--|--|--|--|--|--|--|--|--|--|--|--|--|--|--|--|--|--|--|--|--|--|--|--|--|--|--|--|--|--|--|--|--|--|--|--|--|--|--|--|--|--|--|--|--|--|--|--|--|--|--|--|--|--|--|--|--|--|--|--|--|--|--|--|--|--|--|--|--|--|--|--|--|--|--|--|--|--|--|--|--|--|--|--|--|--|--|--|--|--|--|--|--|--|--|--|--|--|--|--|--|--|--|--|--|--|--|--|--|--|--|--|--|--|--|--|--|--|--|--|--|--|--|--|--|--|--|--|--|--|--|--|--|--|--|--|--|--|--|--|--|--|--|--|--|--|--|--|--|--|--|--|--|--|--|--|--|--|--|--|--|--|--|--|--|--|--|--|--|--|--|--|--|--|--|--|--|--|--|--|--|--|--|--|--|--|--|--|--|--|--|--|--|--|--|--|--|--|--|--|--|--|--|--|--|--|--|--|--|--|--|--|--|--|--|--|--|--|--|--|--|--|--|--|--|--|--|--|--|--|--|--|--|--|--|--|--|--|--|--|--|--|--|--|--|--|--|--|--|--|--|--|--|--|--|--|--|--|--|--|--|--|--|--|--|--|--|--|--|--|--|--|--|--|--|--|--|--|--|--|--|--|--|--|--|--|--|--|--|--|--|--|--|--|--|--|--|--|--|--|--|--|--|--|--|--|--|--|--|--|--|--|--|--|--|--|--|--|--|--|--|--|--|--|--|--|--|--|--|--|--|--|--|--|--|--|--|--|--|--|--|--|--|--|--|--|--|--|--|--|--|--|--|--|--|--|--|--|--|--|--|--|--|--|--|--|--|--|--|--|--|--|--|--|--|--|--|--|--|--|--|--|--|--|--|--|--|--|--|--|--|--|--|--|--|--|--|--|--|--|--|--|--|--|--|--|--|--|--|--|--|--|--|--|--|--|--|--|--|--|--|--|--|--|--|--|--|--|--|--|--|--|--|--|--|--|--|--|--|--|--|--|--|--|--|--|--|--|--|--|--|--|--|--|--|--|--|--|--|--|--|--|--|--|--|--|--|--|--|--|--|--|--|--|--|--|--|--|--|--|--|--|--|--|--|--|--|--|--|--|--|--|--|--|--|--|--|--|--|--|--|--|--|--|--|--|--|--|--|--|--|--|--|--|--|--|--|--|--|--|--|--|--|--|--|--|--|--|--|--|--|--|--|--|--|--|--|--|--|--|--|--|--|--|--|--|--|--|--|--|--|--|--|--|--|--|--|--|--|--|--|--|--|--|--|--|--|--|--|--|--|--|--|--|--|--|--|--|--|--|--|--|--|--|--|--|--|--|--|--|--|--|--|--|--|--|--|--|--|--|--|--|--|--|--|--|--|--|--|--|--|--|--|--|--|--|--|--|--|--|--|--|--|--|--|--|--|--|--|--|--|--|--|--|--|--|--|--|--|--|--|--|--|--|--|--|--|--|--|--|--|--|--|--|--|--|--|--|--|--|--|--|--|--|--|--|--|--|--|--|--|--|--|--|--|--|--|--|--|--|--|--|--|--|--|--|--|--|--|--|--|--|--|--|--|--|--|--|--|--|--|--|--|--|--|--|--|--|--|--|--|--|--|--|--|--|--|--|--|--|--|--|--|--|--|--|--|--|--|--|--|--|--|--|--|--|--|--|--|--|--|--|--|--|--|--|--|--|--|--|--|--|--|--|--|--|--|--|--|--|--|--|--|--|--|--|--|--|--|--|--|--|--|--|--|--|--|--|--|--|--|--|--|--|--|--|--|--|--|--|--|--|--|--|--|--|--|--|--|--|--|--|--|--|--|--|--|--|--|--|--|--|--|--|--|--|--|--|--|--|--|--|--|--|--|--|--|--|--|--|--|--|--|--|--|--|--|--|--|--|--|--|--|--|--|--|--|--|--|--|--|--|--|--|--|--|--|--|--|--|--|--|--|--|--|--|--|--|--|--|--|--|--|--|--|--|--|--|--|--|--|--|--|--|--|--|--|--|--|--|--|--|--|--|--|--|--|--|--|--|--|--|--|--|--|--|--|--|--|--|--|--|--|--|--|--|--|--|--|--|--|--|--|--|--|--|--|--|--|--|--|--|--|--|--|--|--|--|--|--|--|--|--|--|--|--|--|--|--|--|--|--|--|--|--|--|--|--|--|--|--|--|--|--|--|--|--|--|--|--|--|--|--|--|--|--|--|--|--|--|--|--|--|--|--|--|--|--|--|--|--|--|--|--|--|--|--|--|--|--|--|--|--|--|--|--|--|--|--|--|--|--|--|--|--|--|--|--|--|--|--|--|--|--|--|--|--|--|--|--|--|--|--|--|--|--|--|--|--|--|--|--|--|--|--|--|--|--|--|--|--|--|--|--|--|--|--|--|--|--|--|--|--|--|--|--|--|--|--|--|--|--|--|--|--|--|--|--|--|--|--|--|--|--|--|--|--|--|--|--|--|--|--|--|--|--|--|--|--|--|--|--|--|--|--|--|--|--|--|--|--|--|--|--|--|--|--|--|--|--|--|--|--|--|--|--|--|--|--|--|--|--|--|--|--|--|--|--|--|--|--|--|--|--|--|--|--|--|--|--|--|--|--|--|--|--|--|--|--|--|--|--|--|--|--|--|--|--|--|--|--|--|--|--|--|--|--|--|--|--|--|--|--|--|--|--|--|--|--|--|--|--|--|--|--|--|--|--|--|--|--|--|--|--|--|--|--|--|--|--|--|--|--|--|--|--|--|--|--|--|--|--|--|--|--|--|--|--|--|--|--|--|--|--|--|--|--|--|--|--|--|--|--|--|--|--|--|--|--|--|--|--|--|--|--|--|--|--|--|--|--|--|--|--|--|--|--|--|--|--|--|--|--|--|--|--|--|--|--|--|--|--|--|--|--|--|--|--|--|--|--|--|--|--|--|--|--|--|--|--|--|--|--|--|--|--|--|--|--|--|--|--|--|--|--|--|--|--|--|--|--|--|--|--|--|--|--|--|--|--|--|--|--|--|--|--|--|--|--|--|--|--|--|--|--|--|--|--|--|--|--|--|--|--|--|--|--|--|--|--|--|--|--|--|--|--|--|--|--|--|--|--|--|--|--|--|

|  |  |  |  |  |  |  |  |  |  |  |  |  |  |  |  |  |  |  |  |  |  |  |  |  |  |  |  |  |  |  |  |  |  |  |  |  |  |  |  |  |  |  |  |  |  |  |  |  |  |  |  |  |  |  |  |  |  |  |  |  |  |  |  |  |  |  |  |  |  |  |  |  |  |  |  |  |  |  |  |  |  |  |  |  |  |  |  |  |  |  |  |  |  |  |  |  |  |  |  |  |  |  |  |  |  |  |  |  |  |  |  |  |  |  |  |  |  |  |  |  |  |  |  |  |  |  |  |  |  |  |  |  |  |  |  |  |  |  |  |  |  |  |  |  |  |  |  |  |  |  |  |  |  |  |  |  |  |  |  |  |  |  |  |  |  |  |  |  |  |  |  |  |  |  |  |  |  |  |  |  |  |  |  |  |  |  |  |  |  |  |  |  |  |  |  |  |  |  |  |  |  |  |  |  |  |  |  |  |  |  |  |  |  |  |  |  |  |  |  |  |  |  |  |  |  |  |  |  |  |  |  |  |  |  |  |  |  |  |  |  |  |  |  |  |  |  |  |  |  |  |  |  |  |  |  |  |  |  |  |  |  |  |  |  |  |  |  |  |  |  |  |  |  |  |  |  |  |  |  |  |  |  |  |  |  |  |  |  |  |  |  |  |  |  |  |  |  |  |  |  |  |  |  |  |  |  |  |  |  |  |  |  |  |  |  |  |  |  |  |  |  |  |  |  |  |  |  |  |  |  |  |  |  |  |  |  |  |  |  |  |  |  |  |  |  |  |  |  |  |  |  |  |  |  |  |  |  |  |  |  |  |  |  |  |  |  |  |  |  |  |  |  |  |  |  |  |  |  |  |  |  |  |  |  |  |  |  |  |  |  |  |  |  |  |  |  |  |  |  |  |  |  |  |  |  |  |  |  |  |  |  |  |  |  |  |  |  |  |  |  |  |  |  |  |  |  |  |  |  |  |  |  |  |  |  |  |  |  |  |  |  |  |  |  |  |  |  |  |  |  |  |  |  |  |  |  |  |  |  |  |  |  |  |  |  |  |  |  |  |  |  |  |  |  |  |  |  |  |  |  |  |  |  |  |  |  |  |  |  |  |  |  |  |  |  |  |  |  |  |  |  |  |  |  |  |  |  |  |  |  |  |  |  |  |  |  |  |  |  |  |  |  |  |  |  |  |  |  |  |  |  |  |  |  |  |  |  |  |  |  |  |  |  |  |  |  |  |  |  |  |  |  |  |  |  |  |  |  |  |  |  |  |  |  |  |  |  |  |  |  |  |  |  |  |  |  |  |  |  |  |  |  |  |  |  |  |  |  |  |  |  |  |  |  |  |  |  |  |  |  |  |  |  |  |  |  |  |  |  |  |  |  |  |  |  |  |  |  |  |  |  |  |  |  |  |  |  |  |  |  |  |  |  |  |  |  |  |  |  |  |  |  |  |  |  |  |  |  |  |  |  |  |  |  |  |  |  |  |  |  |  |  |  |  |  |  |  |  |  |  |  |  |  |  |  |  |  |  |  |  |  |  |  |  |  |  |  |  |  |  |  |  |  |  |  |  |  |  |  |  |  |  |  |  |  |  |  |  |  |  |  |  |  |  |  |  |  |  |  |  |  |  |  |  |  |  |  |  |  |  |  |  |  |  |  |  |  |  |  |  |  |  |  |  |  |  |  |  |  |  |  |  |  |  |  |  |  |  |  |  |  |  |  |  |  |  |  |  |  |  |  |  |  |  |  |  |  |  |  |  |  |  |  |  |  |  |  |  |  |  |  |  |  |  |  |  |  |  |  |  |  |  |  |  |  |  |  |  |  |  |  |  |  |  |  |  |  |  |  |  |  |  |  |  |  |  |  |  |  |  |  |  |  |  |  |  |  |  |  |  |  |  |  |  |  |  |  |  |  |  |  |  |  |  |  |  |  |  |  |  |  |  |  |  |  |  |  |  |  |  |  |  |  |  |  |  |  |  |  |  |  |  |  |  |  |  |  |  |  |  |  |  |  |  |  |  |  |  |  |  |  |  |  |  |  |  |  |  |  |  |  |  |  |  |  |  |  |  |  |  |  |  |  |  |  |  |  |  |  |  |  |  |  |  |  |  |  |  |  |  |  |  |  |  |  |  |  |  |  |  |  |  |  |  |  |  |  |  |  |  |  |  |  |  |  |  |  |  |  |  |  |  |  |  |  |  |  |  |  |  |  |  |  |  |  |  |  |  |  |  |  |  |  |  |  |  |  |  |  |  |  |  |  |  |  |  |  |  |  |  |  |  |  |  |  |  |  |  |  |  |  |  |  |  |  |  |  |  |  |  |  |  |  |  |  |  |  |  |  |  |  |  |  |  |  |  |  |  |  |  |  |  |  |  |  |  |  |  |  |  |  |  |  |  |  |  |  |  |  |  |  |  |  |  |  |  |  |  |  |  |  |  |  |  |  |  |  |  |  |  |  |  |  |  |  |  |  |  |  |  |  |  |  |  |  |  |  |  |  |  |  |  |  |  |  |  |  |  |  |  |  |  |  |  |  |  |  |  |  |  |  |  |  |  |  |  |  |  |  |  |  |  |  |  |  |  |  |  |  |  |  |  |  |  |  |  |  |  |  |  |  |  |  |  |  |  |  |  |  |  |  |  |  |  |  |  |  |  |  |  |  |  |  |  |  |  |  |  |  |  |  |  |  |  |  |  |  |  |  |  |  |  |  |  |  |  |  |  |  |  |  |  |  |  |  |  |  |  |  |  |  |  |  |  |  |  |  |  |  |  |  |  |  |  |  |  |  |  |  |  |  |  |  |  |  |  |  |  |  |  |  |  |  |  |  |  |  |  |  |  |  |  |  |  |  |  |  |  |  |  |  |  |  |  |  |  |  |  |  |  |  |  |  |  |  |  |  |  |  |  |  |  |  |  |  |  |  |  |  |  |  |  |  |  |  |  |  |  |  |  |  |  |  |  |  |  |  |  |  |  |  |  |  |  |  |  |  |  |  |  |  |  |  |  |  |  |  |  |  |  |  |  |  |  |  |  |  |  |  |  |  |  |  |  |  |  |  |  |  |  |  |  |  |  |
|--|--|--|--|--|--|--|--|--|--|--|--|--|--|--|--|--|--|--|--|--|--|--|--|--|--|--|--|--|--|--|--|--|--|--|--|--|--|--|--|--|--|--|--|--|--|--|--|--|--|--|--|--|--|--|--|--|--|--|--|--|--|--|--|--|--|--|--|--|--|--|--|--|--|--|--|--|--|--|--|--|--|--|--|--|--|--|--|--|--|--|--|--|--|--|--|--|--|--|--|--|--|--|--|--|--|--|--|--|--|--|--|--|--|--|--|--|--|--|--|--|--|--|--|--|--|--|--|--|--|--|--|--|--|--|--|--|--|--|--|--|--|--|--|--|--|--|--|--|--|--|--|--|--|--|--|--|--|--|--|--|--|--|--|--|--|--|--|--|--|--|--|--|--|--|--|--|--|--|--|--|--|--|--|--|--|--|--|--|--|--|--|--|--|--|--|--|--|--|--|--|--|--|--|--|--|--|--|--|--|--|--|--|--|--|--|--|--|--|--|--|--|--|--|--|--|--|--|--|--|--|--|--|--|--|--|--|--|--|--|--|--|--|--|--|--|--|--|--|--|--|--|--|--|--|--|--|--|--|--|--|--|--|--|--|--|--|--|--|--|--|--|--|--|--|--|--|--|--|--|--|--|--|--|--|--|--|--|--|--|--|--|--|--|--|--|--|--|--|--|--|--|--|--|--|--|--|--|--|--|--|--|--|--|--|--|--|--|--|--|--|--|--|--|--|--|--|--|--|--|--|--|--|--|--|--|--|--|--|--|--|--|--|--|--|--|--|--|--|--|--|--|--|--|--|--|--|--|--|--|--|--|--|--|--|--|--|--|--|--|--|--|--|--|--|--|--|--|--|--|--|--|--|--|--|--|--|--|--|--|--|--|--|--|--|--|--|--|--|--|--|--|--|--|--|--|--|--|--|--|--|--|--|--|--|--|--|--|--|--|--|--|--|--|--|--|--|--|--|--|--|--|--|--|--|--|--|--|--|--|--|--|--|--|--|--|--|--|--|--|--|--|--|--|--|--|--|--|--|--|--|--|--|--|--|--|--|--|--|--|--|--|--|--|--|--|--|--|--|--|--|--|--|--|--|--|--|--|--|--|--|--|--|--|--|--|--|--|--|--|--|--|--|--|--|--|--|--|--|--|--|--|--|--|--|--|--|--|--|--|--|--|--|--|--|--|--|--|--|--|--|--|--|--|--|--|--|--|--|--|--|--|--|--|--|--|--|--|--|--|--|--|--|--|--|--|--|--|--|--|--|--|--|--|--|--|--|--|--|--|--|--|--|--|--|--|--|--|--|--|--|--|--|--|--|--|--|--|--|--|--|--|--|--|--|--|--|--|--|--|--|--|--|--|--|--|--|--|--|--|--|--|--|--|--|--|--|--|--|--|--|--|--|--|--|--|--|--|--|--|--|--|--|--|--|--|--|--|--|--|--|--|--|--|--|--|--|--|--|--|--|--|--|--|--|--|--|--|--|--|--|--|--|--|--|--|--|--|--|--|--|--|--|--|--|--|--|--|--|--|--|--|--|--|--|--|--|--|--|--|--|--|--|--|--|--|--|--|--|--|--|--|--|--|--|--|--|--|--|--|--|--|--|--|--|--|--|--|--|--|--|--|--|--|--|--|--|--|--|--|--|--|--|--|--|--|--|--|--|--|--|--|--|--|--|--|--|--|--|--|--|--|--|--|--|--|--|--|--|--|--|--|--|--|--|--|--|--|--|--|--|--|--|--|--|--|--|--|--|--|--|--|--|--|--|--|--|--|--|--|--|--|--|--|--|--|--|--|--|--|--|--|--|--|--|--|--|--|--|--|--|--|--|--|--|--|--|--|--|--|--|--|--|--|--|--|--|--|--|--|--|--|--|--|--|--|--|--|--|--|--|--|--|--|--|--|--|--|--|--|--|--|--|--|--|--|--|--|--|--|--|--|--|--|--|--|--|--|--|--|--|--|--|--|--|--|--|--|--|--|--|--|--|--|--|--|--|--|--|--|--|--|--|--|--|--|--|--|--|--|--|--|--|--|--|--|--|--|--|--|--|--|--|--|--|--|--|--|--|--|--|--|--|--|--|--|--|--|--|--|--|--|--|--|--|--|--|--|--|--|--|--|--|--|--|--|--|--|--|--|--|--|--|--|--|--|--|--|--|--|--|--|--|--|--|--|--|--|--|--|--|--|--|--|--|--|--|--|--|--|--|--|--|--|--|--|--|--|--|--|--|--|--|--|--|--|--|--|--|--|--|--|--|--|--|--|--|--|--|--|--|--|--|--|--|--|--|--|--|--|--|--|--|--|--|--|--|--|--|--|--|--|--|--|--|--|--|--|--|--|--|--|--|--|--|--|--|--|--|--|--|--|--|--|--|--|--|--|--|--|--|--|--|--|--|--|--|--|--|--|--|--|--|--|--|--|--|--|--|--|--|--|--|--|--|--|--|--|--|--|--|--|--|--|--|--|--|--|--|--|--|--|--|--|--|--|--|--|--|--|--|--|--|--|--|--|--|--|--|--|--|--|--|--|--|--|--|--|--|--|--|--|--|--|--|--|--|--|--|--|--|--|--|--|--|--|--|--|--|--|--|--|--|--|--|--|--|--|--|--|--|--|--|--|--|--|--|--|--|--|--|--|--|--|--|--|--|--|--|--|--|--|--|--|--|--|--|--|--|--|--|--|--|--|--|--|--|--|--|--|--|--|--|--|--|--|--|--|--|--|--|--|--|--|--|--|--|--|--|--|--|--|--|--|--|--|--|--|--|--|--|--|--|--|--|--|--|--|--|--|--|--|--|--|--|--|--|--|--|--|--|--|--|--|--|--|--|--|--|--|--|--|--|--|--|--|--|--|--|--|--|--|--|--|--|--|--|--|--|--|--|--|--|--|--|--|--|--|--|--|--|--|--|--|--|--|--|--|--|--|--|--|--|--|--|--|--|--|--|--|--|--|--|--|--|--|--|--|--|--|--|--|--|--|--|--|--|--|--|--|--|--|--|--|--|--|--|--|--|--|--|--|--|--|--|--|--|--|--|--|--|--|--|--|--|--|--|--|--|--|--|--|--|--|--|
|  |  |  |  |  |  |  |  |  |  |  |  |  |  |  |  |  |  |  |  |  |  |  |  |  |  |  |  |  |  |  |  |  |  |  |  |  |  |  |  |  |  |  |  |  |  |  |  |  |  |  |  |  |  |  |  |  |  |  |  |  |  |  |  |  |  |  |  |  |  |  |  |  |  |  |  |  |  |  |  |  |  |  |  |  |  |  |  |  |  |  |  |  |  |  |  |  |  |  |  |  |  |  |  |  |  |  |  |  |  |  |  |  |  |  |  |  |  |  |  |  |  |  |  |  |  |  |  |  |  |  |  |  |  |  |  |  |  |  |  |  |  |  |  |  |  |  |  |  |  |  |  |  |  |  |  |  |  |  |  |  |  |  |  |  |  |  |  |  |  |  |  |  |  |  |  |  |  |  |  |  |  |  |  |  |  |  |  |  |  |  |  |  |  |  |  |  |  |  |  |  |  |  |  |  |  |  |  |  |  |  |  |  |  |  |  |  |  |  |  |  |  |  |  |  |  |  |  |  |  |  |  |  |  |  |  |  |  |  |  |  |  |  |  |  |  |  |  |  |  |  |  |  |  |  |  |  |  |  |  |  |  |  |  |  |  |  |  |  |  |  |  |  |  |  |  |  |  |  |  |  |  |  |  |  |  |  |  |  |  |  |  |  |  |  |  |  |  |  |  |  |  |  |  |  |  |  |  |  |  |  |  |  |  |  |  |  |  |  |  |  |  |  |  |  |  |  |  |  |  |  |  |  |  |  |  |  |  |  |  |  |  |  |  |  |  |  |  |  |  |  |  |  |  |  |  |  |  |  |  |  |  |  |  |  |  |  |  |  |  |  |  |  |  |  |  |  |  |  |  |  |  |  |  |  |  |  |  |  |  |  |  |  |  |  |  |  |  |  |  |  |  |  |  |  |  |  |  |  |  |  |  |  |  |  |  |  |  |  |  |  |  |  |  |  |  |  |  |  |  |  |  |  |  |  |  |  |  |  |  |  |  |  |  |  |  |  |  |  |  |  |  |  |  |  |  |  |  |  |  |  |  |  |  |  |  |  |  |  |  |  |  |  |  |  |  |  |  |  |  |  |  |  |  |  |  |  |  |  |  |  |  |  |  |  |  |  |  |  |  |  |  |  |  |  |  |  |  |  |  |  |  |  |  |  |  |  |  |  |  |  |  |  |  |  |  |  |  |  |  |  |  |  |  |  |  |  |  |  |  |  |  |  |  |  |  |  |  |  |  |  |  |  |  |  |  |  |  |  |  |  |  |  |  |  |  |  |  |  |  |  |  |  |  |  |  |  |  |  |  |  |  |  |  |  |  |  |  |  |  |  |  |  |  |  |  |  |  |  |  |  |  |  |  |  |  |  |  |  |  |  |  |  |  |  |  |  |  |  |  |  |  |  |  |  |  |  |  |  |  |  |  |  |  |  |  |  |  |  |  |  |  |  |  |  |  |  |  |  |  |  |  |  |  |  |  |  |  |  |  |  |  |  |  |  |  |  |  |  |  |  |  |  |  |  |  |  |  |  |  |  |  |  |  |  |  |  |  |  |  |  |  |  |  |  |  |  |  |  |  |  |  |  |  |  |  |  |  |  |  |  |  |  |  |  |  |  |  |  |  |  |  |  |  |  |  |  |  |  |  |  |  |  |  |  |  |  |  |  |  |  |  |  |  |  |  |  |  |  |  |  |  |  |  |  |  |  |  |  |  |  |  |  |  |  |  |  |  |  |  |  |  |  |  |  |  |  |  |  |  |  |  |  |  |  |  |  |  |  |  |  |  |  |  |  |  |  |  |  |  |  |  |  |  |  |  |  |  |  |  |  |  |  |  |  |  |  |  |  |  |  |  |  |  |  |  |  |  |  |  |  |  |  |  |  |  |  |  |  |  |  |  |  |  |  |  |  |  |  |  |  |  |  |  |  |  |  |  |  |  |  |  |  |  |  |  |  |  |  |  |  |  |  |  |  |  |  |  |  |  |  |  |  |  |  |  |  |  |  |  |  |  |  |  |  |  |  |  |  |  |  |  |  |  |  |  |  |  |  |  |  |  |  |  |  |  |  |  |  |  |  |  |  |  |  |  |  |  |  |  |  |  |  |  |  |  |  |  |  |  |  |  |  |  |  |  |  |  |  |  |  |  |  |  |  |  |  |  |  |  |  |  |  |  |  |  |  |  |  |  |  |  |  |  |  |  |  |  |  |  |  |  |  |  |  |  |  |  |  |  |  |  |  |  |  |  |  |  |  |  |  |  |  |  |  |  |  |  |  |  |  |  |  |  |  |  |  |  |  |  |  |  |  |  |  |  |  |  |  |  |  |  |  |  |  |  |  |  |  |  |  |  |  |  |  |  |  |  |  |  |  |  |  |  |  |  |  |  |  |  |  |  |  |  |  |  |  |  |  |  |  |  |  |  |  |  |  |  |  |  |  |  |  |  |  |  |  |  |  |  |  |  |  |  |  |  |  |  |  |  |  |  |  |  |  |  |  |  |  |  |  |  |  |  |  |  |  |  |  |  |  |  |  |  |  |  |  |  |  |  |  |  |  |  |  |  |  |  |  |  |  |  |  |  |  |  |  |  |  |  |  |  |  |  |  |  |  |  |  |  |  |  |  |  |  |  |  |  |  |  |  |  |  |  |  |  |  |  |  |  |  |  |  |  |  |  |  |  |  |  |  |  |  |  |  |  |  |  |  |  |  |  |  |  |  |  |  |  |  |  |  |  |  |  |  |  |  |  |  |  |  |  |  |  |  |  |  |  |  |  |  |  |  |  |  |  |  |  |  |  |  |  |  |  |  |  |  |  |  |  |  |  |  |  |  |  |  |  |  |  |  |  |  |  |  |  |  |  |  |  |  |  |  |  |  |  |  |  |  |  |  |  |  |  |  |  |  |  |  |  |  |  |  |  |  |  |  |  |  |  |  |  |  |  |  |  |  |  |  |  |  |  |  |  |  |  |  |  |  |  |  |  |  |  |  |  |  |  |  |  |  |  |  |  |  |  |  |  |  |  |  |  |  |  |  |  |  |  |  |  |  |  |  |  |  |  |  |  |  |  |  |  |  |  |  |
|--|--|--|--|--|--|--|--|--|--|--|--|--|--|--|--|--|--|--|--|--|--|--|--|--|--|--|--|--|--|--|--|--|--|--|--|--|--|--|--|--|--|--|--|--|--|--|--|--|--|--|--|--|--|--|--|--|--|--|--|--|--|--|--|--|--|--|--|--|--|--|--|--|--|--|--|--|--|--|--|--|--|--|--|--|--|--|--|--|--|--|--|--|--|--|--|--|--|--|--|--|--|--|--|--|--|--|--|--|--|--|--|--|--|--|--|--|--|--|--|--|--|--|--|--|--|--|--|--|--|--|--|--|--|--|--|--|--|--|--|--|--|--|--|--|--|--|--|--|--|--|--|--|--|--|--|--|--|--|--|--|--|--|--|--|--|--|--|--|--|--|--|--|--|--|--|--|--|--|--|--|--|--|--|--|--|--|--|--|--|--|--|--|--|--|--|--|--|--|--|--|--|--|--|--|--|--|--|--|--|--|--|--|--|--|--|--|--|--|--|--|--|--|--|--|--|--|--|--|--|--|--|--|--|--|--|--|--|--|--|--|--|--|--|--|--|--|--|--|--|--|--|--|--|--|--|--|--|--|--|--|--|--|--|--|--|--|--|--|--|--|--|--|--|--|--|--|--|--|--|--|--|--|--|--|--|--|--|--|--|--|--|--|--|--|--|--|--|--|--|--|--|--|--|--|--|--|--|--|--|--|--|--|--|--|--|--|--|--|--|--|--|--|--|--|--|--|--|--|--|--|--|--|--|--|--|--|--|--|--|--|--|--|--|--|--|--|--|--|--|--|--|--|--|--|--|--|--|--|--|--|--|--|--|--|--|--|--|--|--|--|--|--|--|--|--|--|--|--|--|--|--|--|--|--|--|--|--|--|--|--|--|--|--|--|--|--|--|--|--|--|--|--|--|--|--|--|--|--|--|--|--|--|--|--|--|--|--|--|--|--|--|--|--|--|--|--|--|--|--|--|--|--|--|--|--|--|--|--|--|--|--|--|--|--|--|--|--|--|--|--|--|--|--|--|--|--|--|--|--|--|--|--|--|--|--|--|--|--|--|--|--|--|--|--|--|--|--|--|--|--|--|--|--|--|--|--|--|--|--|--|--|--|--|--|--|--|--|--|--|--|--|--|--|--|--|--|--|--|--|--|--|--|--|--|--|--|--|--|--|--|--|--|--|--|--|--|--|--|--|--|--|--|--|--|--|--|--|--|--|--|--|--|--|--|--|--|--|--|--|--|--|--|--|--|--|--|--|--|--|--|--|--|--|--|--|--|--|--|--|--|--|--|--|--|--|--|--|--|--|--|--|--|--|--|--|--|--|--|--|--|--|--|--|--|--|--|--|--|--|--|--|--|--|--|--|--|--|--|--|--|--|--|--|--|--|--|--|--|--|--|--|--|--|--|--|--|--|--|--|--|--|--|--|--|--|--|--|--|--|--|--|--|--|--|--|--|--|--|--|--|--|--|--|--|--|--|--|--|--|--|--|--|--|--|--|--|--|--|--|--|--|--|--|--|--|--|--|--|--|--|--|--|--|--|--|--|--|--|--|--|--|--|--|--|--|--|--|--|--|--|--|--|--|--|--|--|--|--|--|--|--|--|--|--|--|--|--|--|--|--|--|--|--|--|--|--|--|--|--|--|--|--|--|--|--|--|--|--|--|--|--|--|--|--|--|--|--|--|--|--|--|--|--|--|--|--|--|--|--|--|--|--|--|--|--|--|--|--|--|--|--|--|--|--|--|--|--|--|--|--|--|--|--|--|--|--|--|--|--|--|--|--|--|--|--|--|--|--|--|--|--|--|--|--|--|--|--|--|--|--|--|--|--|--|--|--|--|--|--|--|--|--|--|--|--|--|--|--|--|--|--|--|--|--|--|--|--|--|--|--|--|--|--|--|--|--|--|--|--|--|--|--|--|--|--|--|--|--|--|--|--|--|--|--|--|--|--|--|--|--|--|--|--|--|--|--|--|--|--|--|--|--|--|--|--|--|--|--|--|--|--|--|--|--|--|--|--|--|--|--|--|--|--|--|--|--|--|--|--|--|--|--|--|--|--|--|--|--|--|--|--|--|--|--|--|--|--|--|--|--|--|--|--|--|--|--|--|--|--|--|--|--|--|--|--|--|--|--|--|--|--|--|--|--|--|--|--|--|--|--|--|--|--|--|--|--|--|--|--|--|--|--|--|--|--|--|--|--|--|--|--|--|--|--|--|--|--|--|--|--|--|--|--|--|--|--|--|--|--|--|--|--|--|--|--|--|--|--|--|--|--|--|--|--|--|--|--|--|--|--|--|--|--|--|--|--|--|--|--|--|--|--|--|--|--|--|--|--|--|--|--|--|--|--|--|--|--|--|--|--|--|--|--|--|--|--|--|--|--|--|--|--|--|--|--|--|--|--|--|--|--|--|--|--|--|--|--|--|--|--|--|--|--|--|--|--|--|--|--|--|--|--|--|--|--|--|--|--|--|--|--|--|--|--|--|--|--|--|--|--|--|--|--|--|--|--|--|--|--|--|--|--|--|--|--|--|--|--|--|--|--|--|--|--|--|--|--|--|--|--|--|--|--|--|--|--|--|--|--|--|--|--|--|--|--|--|--|--|--|--|--|--|--|--|--|--|--|--|--|--|--|--|--|--|--|--|--|--|--|--|--|--|--|--|--|--|--|--|--|--|--|--|--|--|--|--|--|--|--|--|--|--|--|--|--|--|--|--|--|--|--|--|--|--|--|--|--|--|--|--|--|--|--|--|--|--|--|--|--|--|--|--|--|--|--|--|--|--|--|--|--|--|--|--|--|--|--|--|--|--|--|--|--|--|--|--|--|--|--|--|--|--|--|--|--|--|--|--|--|--|--|--|--|--|--|--|--|--|--|--|--|--|--|--|--|--|--|--|--|--|--|--|--|--|--|--|--|--|--|--|--|--|--|--|--|--|--|--|--|--|--|--|--|--|--|--|--|--|--|--|--|--|--|--|--|--|--|--|--|--|--|--|--|--|--|--|--|--|--|--|--|--|--|--|--|--|--|--|--|--|--|--|--|--|--|--|--|--|--|--|--|--|--|--|

[illegible]

[illegible]

|                                                               |                                                     |              |              |              |              |              |             |              |              |              |      |     |
|---------------------------------------------------------------|-----------------------------------------------------|--------------|--------------|--------------|--------------|--------------|-------------|--------------|--------------|--------------|------|-----|
|                                                               | Ghana2022-40_MGF_505-1R                             | MFS LQNL CRK | TLPNRKLPEF   | FDEY ILQLLG  | LYWENHGT IQ  | RAGNNCVL IQ  | QHTL IPVNEA | LRTAASEEN Y  | E IVSLLLAW E | GNLYYA IIGA  | 90   |     |
|                                                               | ASFV-G_ (Georgia-2007)                              |              |              |              |              |              |             |              |              |              | 90   |     |
|                                                               | L60_ (Portugal-1960)                                |              | .DC          | .D           |              |              |             | I            | .G           |              | 90   |     |
|                                                               | Benin_97/1_ (Benin-1997)                            |              | .DC          | .D           |              |              |             | I            | .G           |              | 90   |     |
|                                                               | E75_ (Spain-1975)                                   |              | .DC          | .D           |              |              |             | I            | .G           |              | 90   |     |
|                                                               | Mkuzi_1979_ (South_Africa: Mkuzi_Game_Reserve-1979) |              | .DC          | .D           |              |              | I           |              |              |              | 90   |     |
|                                                               | Warmbaths_ (South_Africa: Warmbaths-1987)           |              | .DC          |              |              |              | R           | I            | .G           |              | 90   |     |
|                                                               | Tengani_62_ (Malawi: Tengani-1962)                  |              | .DC          |              |              |              | N           | I            |              |              | 90   |     |
|                                                               | Warthog_ (Namibia-1980)                             |              | .DC          |              |              |              |             | I            |              |              | 90   |     |
| Pretorisuskop/96/4_ (South_Africa: Kruger_National_Park-1996) |                                                     |              | .DC          |              |              | V            |             | I            |              |              | 90   |     |
|                                                               | Malawi_Lil-20/1_ (Malawi: Chalaswa-1983)            |              | .DC          |              |              |              | N           | I            |              |              | 90   |     |
|                                                               | Ken05/Tk1_ (Kenya-2005)                             |              | .DC          | .D .V        |              |              | N           | I            |              |              | 90   |     |
|                                                               | Ken06.Bus_ (Kenya-2006)                             |              | .DC          | .D .V        |              |              | N           | I            |              |              | 90   |     |
|                                                               | Kenya_1950_ (Kenya-1950)                            |              | .D           | .D .V        |              |              | N           | I            |              |              | 90   |     |
| Conservation                                                  |                                                     |              |              |              |              |              |             |              |              |              |      |     |
|                                                               | Ghana2022-40_MGF_505-1R                             | LEGNRHDL IR  | KYDDQ IKDHH  | E ILPF IDDPV | IFHKCH IMRQ  | CFFDC ILYQA  | VKYSKFRVLL  | YFKHRLEDDL   | PFTHLL IEKA  | CKDHN YEV IK | 180  |     |
|                                                               | ASFV-G_ (Georgia-2007)                              |              |              |              |              |              |             |              |              |              | 180  |     |
|                                                               | L60_ (Portugal-1960)                                | .YN          |              | D            | I            | R            |             | YT           | .LV          | .E           | 180  |     |
|                                                               | Benin_97/1_ (Benin-1997)                            | .YN          |              | D            | I            | R            |             | YT           | .LV          | .E           | 180  |     |
|                                                               | E75_ (Spain-1975)                                   | .YN          |              | D            | I            | R            |             | YT           | .LV          | .E           | 180  |     |
|                                                               | Mkuzi_1979_ (South_Africa: Mkuzi_Game_Reserve-1979) |              |              |              |              | R            |             | Y            | .L           | .EN          | 180  |     |
|                                                               | Warmbaths_ (South_Africa: Warmbaths-1987)           |              |              |              | I R          | .N           |             |              | .L           | .E           | 180  |     |
|                                                               | Tengani_62_ (Malawi: Tengani-1962)                  |              |              |              |              |              |             | S            | .R           |              | 180  |     |
|                                                               | Warthog_ (Namibia-1980)                             |              |              |              |              | R            |             | Y .N         | .LA .K       | .E           | 180  |     |
| Pretorisuskop/96/4_ (South_Africa: Kruger_National_Park-1996) |                                                     |              |              | .N           | R            |              |             | Y .N         | .LA .V       | .E           | 180  |     |
|                                                               | Malawi_Lil-20/1_ (Malawi: Chalaswa-1983)            | .P           |              |              | I            | R            | .N          | G            | .L           | .E           | 180  |     |
|                                                               | Ken05/Tk1_ (Kenya-2005)                             | .N           |              |              |              | R            | .N .M       | .S           | .Y I .KEN    | .LV .S       | Y .Y | 180 |
|                                                               | Ken06.Bus_ (Kenya-2006)                             | .H .N        |              |              | T .R         | .N           | .S          | .Y I .KEN    | .LV .S       | Y .Y         | 180  |     |
|                                                               | Kenya_1950_ (Kenya-1950)                            | .N           |              |              | M .R         | .N           | .S          | .Y I .KEN    | .LV .S       | .E           | 180  |     |
| Conservation                                                  |                                                     |              |              |              |              |              |             |              |              |              |      |     |
|                                                               | Ghana2022-40_MGF_505-1R                             | W IYENLH IYN | M IDTFECA IA | HKDLHL YCLG  | YRF IYNR IVP | DKYHHLD IRM  | LSSLQLLHKV  | AAKG YLDFIL  | ETLKYDHNKD   | N IN IILTQAA | 270  |     |
|                                                               | ASFV-G_ (Georgia-2007)                              |              |              |              |              |              |             |              |              |              | 270  |     |
|                                                               | L60_ (Portugal-1960)                                | .VCH         | I .D         | .R           | T            | Y            | .L I        |              | .I           | .LDV         | 270  |     |
|                                                               | Benin_97/1_ (Benin-1997)                            | .VCH         | I .D         | .R           | T            | Y            | .L I        |              | .I           | .LDV         | 270  |     |
|                                                               | E75_ (Spain-1975)                                   | .VCH         | I .D         | .R           | T            | Y            | .L I        |              | .I           | .LDV         | 270  |     |
|                                                               | Mkuzi_1979_ (South_Africa: Mkuzi_Game_Reserve-1979) |              |              | .R           | T            | N            | .I .L I     |              | .N           | .LD          | 270  |     |
|                                                               | Warmbaths_ (South_Africa: Warmbaths-1987)           | .T .D        | IM           | .R           | T            | YE           | .L I        |              | .N           | .LD          | 270  |     |
|                                                               | Tengani_62_ (Malawi: Tengani-1962)                  |              |              | .R           |              |              |             |              |              |              | 270  |     |
|                                                               | Warthog_ (Namibia-1980)                             |              | IM .G        | .R .R        | T            | Y .Y .V L I  | .G .H .Y    |              | .N           | .LD          | 270  |     |
| Pretorisuskop/96/4_ (South_Africa: Kruger_National_Park-1996) |                                                     | .L           | IME          | .R .R        | T            | Y .Y .V L I  | .G .H .Y    |              | .N           | .LD          | 270  |     |
|                                                               | Malawi_Lil-20/1_ (Malawi: Chalaswa-1983)            | .S           | IM           | .R           | T            | Y            | .C I        |              | .IN          | .D           | 270  |     |
|                                                               | Ken05/Tk1_ (Kenya-2005)                             | .D           | I .N .K Y    | .R           | T .V         | Y .Y         | .I          | .LR          | T            | .TN          | .D   | 270 |
|                                                               | Ken06.Bus_ (Kenya-2006)                             | .D           | I .N .K      | .R           | T .V         | Y .Y         | .I          | .LR          | T            | .TN          | .D   | 270 |
|                                                               | Kenya_1950_ (Kenya-1950)                            | .E           | IM .K        | .S           | T            | Y            | .I          | .R           | T            |              |      | 270 |
| Conservation                                                  |                                                     |              |              |              |              |              |             |              |              |              |      |     |
|                                                               | Ghana2022-40_MGF_505-1R                             | TYNHRK IL IY | F IPQSTHAQ I | EQCLLVA IKA  | KSSRKTLNLL   | LSHLNLS INL  | IKK ISHYVAT | YNSTN IIG IL | SMRRKKK IYL  | D IILTKFVKK  | 360  |     |
|                                                               | ASFV-G_ (Georgia-2007)                              |              |              |              |              |              |             |              |              |              | 360  |     |
|                                                               | L60_ (Portugal-1960)                                | .T           | .Y           | .F           | .T           | .K           | .Q .Q       | F            | .K           | .N           | 360  |     |
|                                                               | Benin_97/1_ (Benin-1997)                            | .T           | .Y           | .F           | .T           | .K           | .Q .Q       | F            | .K           | .N           | 360  |     |
|                                                               | E75_ (Spain-1975)                                   | .T           | .Y           | .F           | .T           | .K           | .Q .Q       | F            | .K           | .N           | 360  |     |
|                                                               | Mkuzi_1979_ (South_Africa: Mkuzi_Game_Reserve-1979) | .T           | .Y           | .M           | .T           | .K           | .Q .Q .V    |              | .K           | .N           | 360  |     |
|                                                               | Warmbaths_ (South_Africa: Warmbaths-1987)           | .T           | .L .Y        | .FM .R       | .K           | .T .E        | .Q .V       |              | .K           | .M .Y .Y     | 360  |     |
|                                                               | Tengani_62_ (Malawi: Tengani-1962)                  |              |              | .T           | .K           |              |             |              |              |              | 360  |     |
|                                                               | Warthog_ (Namibia-1980)                             | .T           | Y .L .Y      | .FM .K       | .K           | .K .K        | .Q          |              | N            |              | 360  |     |
| Pretorisuskop/96/4_ (South_Africa: Kruger_National_Park-1996) |                                                     | .T           | Y .L .Y      | .FM .K       | .K           | .K .K        | .Q          |              | N .K         | .Y           | 360  |     |
|                                                               | Malawi_Lil-20/1_ (Malawi: Chalaswa-1983)            | .T           | .L .Y        | .T           | .A .K        | .K           | .Q .V       | .S           |              | .E .N        | 360  |     |
|                                                               | Ken05/Tk1_ (Kenya-2005)                             | .N .T        | .Y           | .F .T        | NA .K        | .K           | V .L .Q .VA | .K .S        | .QQ          | .V .N        | 360  |     |
|                                                               | Ken06.Bus_ (Kenya-2006)                             | .N .T        | .Y           | .F .T        | NA .K        | .K           | V .L .Q .VA | .K .S        | .RQQ         | .V .N        | 360  |     |
|                                                               | Kenya_1950_ (Kenya-1950)                            | .N .T        | .Y           | .F .T        | NA .K        | .K           | V .L .Q .VA | .K .S        | .QQ          | .V .N        | 360  |     |
| Conservation                                                  |                                                     |              |              |              |              |              |             |              |              |              |      |     |
|                                                               | Ghana2022-40_MGF_505-1R                             | A IFNK FVVRC | MDTFS INPER  | ILK IAAR INR | MMLVKK ISEH  | VWKNHAVRLK   | YLKHAVHTMK  | HKDGNRLMN    | F IYDRCYHYM  | QGEE IFSLA T | 450  |     |
|                                                               | ASFV-G_ (Georgia-2007)                              |              |              |              |              |              |             |              |              | R            | 450  |     |
|                                                               | L60_ (Portugal-1960)                                | .ER          |              | .V .M        | .K           | .A           | H           |              | .EH          | R            | 450  |     |
|                                                               | Benin_97/1_ (Benin-1997)                            | .ER          |              | .V .M        | .K           | .A           | H           |              | .EH          | R            | 450  |     |
|                                                               | E75_ (Spain-1975)                                   | .ER          |              | .V .M        | .K           | .A           | H           |              | .EH          | R            | 450  |     |
|                                                               | Mkuzi_1979_ (South_Africa: Mkuzi_Game_Reserve-1979) | .Y           |              | .V .M        | .K           | I            | .A .E       | H            | .EY          | R            | 450  |     |
|                                                               | Warmbaths_ (South_Africa: Warmbaths-1987)           | .Y           | .R           | .I .M        |              | .A           | H           |              |              | R            | 450  |     |
|                                                               | Tengani_62_ (Malawi: Tengani-1962)                  |              |              |              | T            |              |             |              |              | R            | 450  |     |
|                                                               | Warthog_ (Namibia-1980)                             |              |              | .I .M        | .K           | .L           | .A          | H .Y         | L .HY        | R            | 450  |     |
| Pretorisuskop/96/4_ (South_Africa: Kruger_National_Park-1996) |                                                     | .Y           |              | .I .M        | .K           | .L           | .A          | H .Y         | L .HY        | R            | 450  |     |
|                                                               | Malawi_Lil-20/1_ (Malawi: Chalaswa-1983)            |              |              | .V .M        |              | .N .R        | .K          | H            | .Q E         | G            | 450  |     |
|                                                               | Ken05/Tk1_ (Kenya-2005)                             | .V .I .IG    | .V           | .V .M        | .KK          | .K .N        | .AK         | H            | .Q E         | .H           | R    | 450 |
|                                                               | Ken06.Bus_ (Kenya-2006)                             | .V .IG       | .V           | .V .M        | .KK          | .K .N        | .K          |              | .Q E         | .H           | R    | 450 |
|                                                               | Kenya_1950_ (Kenya-1950)                            | .I .IG       | .V           | .V .M        | .KK          | .K .N        | .AK         | H            | .Q E         | .H           | R    | 450 |
| Conservation                                                  |                                                     |              |              |              |              |              |             |              |              |              |      |     |
|                                                               | Ghana2022-40_MGF_505-1R                             | FYA IHHAPKL  | FDVFYDCC IL  | DT IRFKSLLL  | DCSH IIGKNA  | HDATN IN IVN | KY IGNLFVMG | VLSKKE ILQD  | YPS IYSKQYM  | P *          | 532  |     |
|                                                               | ASFV-G_ (Georgia-2007)                              |              |              |              |              |              |             |              |              |              | 532  |     |
|                                                               | L60_ (Portugal-1960)                                |              | .N           |              |              |              | .A          |              | .H           |              | 532  |     |
|                                                               | Benin_97/1_ (Benin-1997)                            |              | .N           |              |              |              | .A          |              | .H           |              | 532  |     |
|                                                               | E75_ (Spain-1975)                                   |              | .N           |              |              |              | .A          |              | .H           |              | 532  |     |
|                                                               | Mkuzi_1979_ (South_Africa: Mkuzi_Game_Reserve-1979) |              | .N           |              |              |              | .D .A       |              | .H           |              | 532  |     |
|                                                               | Warmbaths_ (South_Africa: Warmbaths-1987)           |              |              | .Q           |              |              | .D .A       |              | .H           | L            | 532  |     |
|                                                               | Tengani_62_ (Malawi: Tengani-1962)                  |              |              |              |              |              |             |              | .H           |              | 532  |     |
|                                                               | Warthog_ (Namibia-1980)                             |              | .L           | .N           |              | .T           | .A          |              | .H           |              | 532  |     |
| Pretorisuskop/96/4_ (South_Africa: Kruger_National_Park-1996) |                                                     |              | .L           |              |              | .T           | .A          |              | .H           |              | 532  |     |
|                                                               | Malawi_Lil-20/1_ (Malawi: Chalaswa-1983)            |              | .M           | .AT          | .P           | .Y .G .L     | .A          |              | .HD          | F            | 531  |     |
|                                                               | Ken05/Tk1_ (Kenya-2005)                             |              |              |              | .A           | .S           | .A          |              | .YD I        | L            | 531  |     |
|                                                               | Ken06.Bus_ (Kenya-2006)                             |              |              |              | .V           | .S           | .A          |              | .D           | L            | 531  |     |
|                                                               | Kenya_1950_ (Kenya-1950)                            |              |              |              | .Y .A        | .S           | .D          | .A           |              | .D           | L    | 531 |
| Conservation                                                  |                                                     |              |              |              |              |              |             |              |              |              |      |     |

[illegible]



|                                                              |                                                    |              |             |              |             |              |              |              |              |              |     |
|--------------------------------------------------------------|----------------------------------------------------|--------------|-------------|--------------|-------------|--------------|--------------|--------------|--------------|--------------|-----|
|                                                              | Ghana2022-34&35_MGF_505-11L                        | MFSLQKKALQ   | H IYMTPENAS | QLTKDLLQHL   | GLYWNGP IVK | MDTV IHLHNN  | IFSNRSVLKY   | ALAKQAN IS I | IETLVLWVEP   | EYALAQA LKH  | 90  |
|                                                              | Ghana2022-40&62                                    |              |             |              |             |              |              |              |              |              | 90  |
|                                                              | ASFV-G_(Georgia-2007)                              |              |             |              |             |              |              |              |              |              | 90  |
|                                                              | L60_(Portugal-1960)                                |              |             |              |             | .V I.        |              |              | .T           | .K           | 90  |
|                                                              | Benin_97/1_(Benin-1997)                            |              |             |              |             | .V I.        |              |              | .T           | .K           | 90  |
|                                                              | E75_(Spain-1975)                                   |              |             |              |             | .V I.        |              |              | .T           | .K           | 90  |
|                                                              | OURT_88/3_(Portugal-1988)                          |              |             |              |             | .V I.        |              |              | .T           | .K           | 90  |
|                                                              | NHV_(Portugal-1968)                                |              |             |              |             | .V I.        |              |              | .T           | .K           | 90  |
|                                                              | Mkuzi_1979_(South Africa: Mkuzi Game Reserve-1979) |              |             | E            |             | .V I.        |              |              |              | .K           | 90  |
|                                                              | Warthog_(Namibia-1980)                             |              |             |              |             | I.           |              |              | .T           | .K           | 90  |
| Pretorisuskop/96/4_(South Africa: Kruger National Park-1996) |                                                    |              |             | E            |             | .VY.         | .K           |              |              | .T           | 90  |
|                                                              | Warmbaths_(South Africa: Warmbaths-1987)           |              |             |              |             | I.           | .V           |              | .T           | .K           | 90  |
|                                                              | Tengani_62_(Malawi: Tengani-1962)                  |              | .Q          |              |             |              |              |              | .T           | .K           | 90  |
|                                                              | Malawi_Lil-20/1_(Malawi: Chalaswa-1983)            |              |             | E .S         |             | I.           | .V           |              | .T           |              | 90  |
|                                                              | Ken05/Tk1_(Kenya-2005)                             |              |             | .D           | D .N        | I.           | .V           | .Q           |              | .K           | 90  |
|                                                              | Kenya_1950_(Kenya-1950)                            |              |             | .D           | .N          | I.           | .V           | .Q           |              | .K           | 90  |
|                                                              | Ken06.Bus_(Kenya-2006)                             |              |             | .D           | .N          | I.           | .V           | .Q           |              | .R           | 90  |
|                                                              | Conservation                                       |              |             |              |             |              |              |              |              |              |     |
|                                                              | Ghana2022-34&35_MGF_505-11L                        | NRKDVLEC IF  | SYHLTTPKYH  | H IMHLTSSQE  | LFEFFHLF IC | KSKNYNARME   | CLLYAATLYN   | FPN ILEKNRE  | Y IIRHS IGNS | LFA IACKERH  | 180 |
|                                                              | Ghana2022-40&62                                    |              |             |              |             |              |              |              |              |              | 180 |
|                                                              | ASFV-G_(Georgia-2007)                              |              |             |              |             |              |              |              |              |              | 180 |
|                                                              | L60_(Portugal-1960)                                |              |             |              |             |              |              |              |              | .T           | 180 |
|                                                              | Benin_97/1_(Benin-1997)                            |              |             |              |             |              |              |              |              | .T           | 180 |
|                                                              | E75_(Spain-1975)                                   |              |             |              |             |              |              |              |              | .T           | 180 |
|                                                              | OURT_88/3_(Portugal-1988)                          |              |             |              |             | R            |              |              |              | .T           | 180 |
|                                                              | NHV_(Portugal-1968)                                |              |             |              |             | R            |              |              |              | .T           | 180 |
|                                                              | Mkuzi_1979_(South Africa: Mkuzi Game Reserve-1979) |              |             |              |             |              |              |              |              |              | 180 |
|                                                              | Warthog_(Namibia-1980)                             |              |             |              |             |              |              |              | .Y           |              | 180 |
| Pretorisuskop/96/4_(South Africa: Kruger National Park-1996) |                                                    |              |             |              |             |              |              |              |              |              | 180 |
|                                                              | Warmbaths_(South Africa: Warmbaths-1987)           |              |             |              |             |              |              |              |              |              | 180 |
|                                                              | Tengani_62_(Malawi: Tengani-1962)                  |              |             |              |             | .H           |              |              |              | .P           | 180 |
|                                                              | Malawi_Lil-20/1_(Malawi: Chalaswa-1983)            |              |             |              |             | .H           |              | .Q           |              | .P           | 180 |
|                                                              | Ken05/Tk1_(Kenya-2005)                             | .I           | .H          | .R .S        |             | .H           |              | .Q           | .V           | .A           | 180 |
|                                                              | Kenya_1950_(Kenya-1950)                            | .I           | .H          | .S           |             | .H           |              | .Q           | .V           | .A           | 180 |
|                                                              | Ken06.Bus_(Kenya-2006)                             | .I           | .H          | .S           |             | .H           |              | .Q           | .V           | .A           | 180 |
|                                                              | Conservation                                       |              |             |              |             |              |              |              |              |              |     |
|                                                              | Ghana2022-34&35_MGF_505-11L                        | IHL IAW FVTA | GVLD TYDDST | LFNTAFRLGD   | YSLLEVACDL  | P IIYPDYL II | LMMQTA IQKN  | YFRFFKKLLT   | HFNI YRP III | TDAAYNRRK    | 270 |
|                                                              | Ghana2022-40&62                                    |              |             |              |             |              | S            |              |              |              | 270 |
|                                                              | ASFV-G_(Georgia-2007)                              |              |             |              |             |              | S            |              |              |              | 270 |
|                                                              | L60_(Portugal-1960)                                |              |             |              |             |              | S            |              | .Q           |              | 270 |
|                                                              | Benin_97/1_(Benin-1997)                            |              |             |              |             |              | S            |              | .Q           |              | 270 |
|                                                              | E75_(Spain-1975)                                   |              |             |              |             |              | S            |              | .Q           |              | 270 |
|                                                              | OURT_88/3_(Portugal-1988)                          |              |             |              | .F          |              | S            |              | R            | .Q           | 270 |
|                                                              | NHV_(Portugal-1968)                                |              |             |              | .F          |              | S            |              | R            | .Q           | 270 |
|                                                              | Mkuzi_1979_(South Africa: Mkuzi Game Reserve-1979) |              |             |              |             |              | S            |              | .Q           |              | 270 |
|                                                              | Warthog_(Namibia-1980)                             |              |             | .M           | .K          |              | S            |              | .Q           |              | 270 |
| Pretorisuskop/96/4_(South Africa: Kruger National Park-1996) |                                                    |              |             | .K           | .K          |              | S            |              | .Q           |              | 270 |
|                                                              | Warmbaths_(South Africa: Warmbaths-1987)           |              |             |              |             |              | S            |              | .Q           |              | 270 |
|                                                              | Tengani_62_(Malawi: Tengani-1962)                  |              |             |              |             |              | S            |              | .L .Q        |              | 270 |
|                                                              | Malawi_Lil-20/1_(Malawi: Chalaswa-1983)            | .N           |             | .K           |             | .T           | S            |              | .S           | .I .N .D     | 270 |
|                                                              | Ken05/Tk1_(Kenya-2005)                             | .A           | .F          |              |             | .T .H        | S            |              | .V           |              | 270 |
|                                                              | Kenya_1950_(Kenya-1950)                            | .A           | .F          |              |             | .T .H        | S            |              | .V           |              | 270 |
|                                                              | Ken06.Bus_(Kenya-2006)                             | .A           | .F          |              |             | .T .H        | S            |              | .V           |              | 270 |
|                                                              | Conservation                                       |              |             |              |             |              |              |              |              |              |     |
|                                                              | Ghana2022-34&35_MGF_505-11L                        | ILLLLLNQN    | FNNFA ILCAL | SAA IKGHASK  | KTLNLL ISQL | DSQMTV IDSV  | YYS IIKYNN I | DC IPLLMQ IK | TFRLETLVS I  | AVHGDN ID II | 360 |
|                                                              | Ghana2022-40&62                                    | .V           |             |              |             |              |              |              |              |              | 360 |
|                                                              | ASFV-G_(Georgia-2007)                              | .V           |             |              |             |              |              | .L           |              |              | 360 |
|                                                              | L60_(Portugal-1960)                                | .V           |             |              |             |              |              |              |              |              | 360 |
|                                                              | Benin_97/1_(Benin-1997)                            | .V           |             |              |             |              |              |              |              |              | 360 |
|                                                              | E75_(Spain-1975)                                   | .V           |             |              |             |              |              |              |              |              | 360 |
|                                                              | OURT_88/3_(Portugal-1988)                          | .V           |             |              |             |              |              |              |              |              | 360 |
|                                                              | NHV_(Portugal-1968)                                | .V           |             |              |             |              |              |              |              |              | 360 |
|                                                              | Mkuzi_1979_(South Africa: Mkuzi Game Reserve-1979) | .V           |             |              |             |              |              |              | .KM          |              | 360 |
|                                                              | Warthog_(Namibia-1980)                             | .K           | .           |              |             | .V           |              |              | .M           | .N .N        | 360 |
| Pretorisuskop/96/4_(South Africa: Kruger National Park-1996) |                                                    | .            |             |              |             | .V           |              |              | .K I .I      | .N .N        | 360 |
|                                                              | Warmbaths_(South Africa: Warmbaths-1987)           | .            |             |              |             |              |              |              | .KM          | .N           | 360 |
|                                                              | Tengani_62_(Malawi: Tengani-1962)                  | .            |             |              |             |              | .V V         |              | .M .L        | .E .N        | 360 |
|                                                              | Malawi_Lil-20/1_(Malawi: Chalaswa-1983)            | .            | .T          |              | .NR         |              |              | .H           | .M .I        |              | 360 |
|                                                              | Ken05/Tk1_(Kenya-2005)                             | .F           | .T          |              | .NR         | .A           | .V           | .M           | .I .L        | .I .NN       | 360 |
|                                                              | Kenya_1950_(Kenya-1950)                            | .F           | .T          |              | .NR         | .A           | .V           |              | .RHL         | .I .L        | 360 |
|                                                              | Ken06.Bus_(Kenya-2006)                             | .F           | .T          |              | .NR         | .A           | .V           | N            | .RHL         | .I .L        | 360 |
|                                                              | Conservation                                       |              |             |              |             |              |              |              |              |              |     |
|                                                              | Ghana2022-34&35_MGF_505-11L                        | AACKAFLPKD   | TLYHLVLKMA  | I ISRNHKLFK  | LYTEKENPMY  | IFTTMKA IIS  | NLVNYTVVQA   | VA IEYLRKFH  | QEKQLP IVPL  | LMVLAEHNY I  | 450 |
|                                                              | Ghana2022-40&62                                    |              |             |              |             |              |              |              |              |              | 450 |
|                                                              | ASFV-G_(Georgia-2007)                              |              |             |              |             |              |              |              |              |              | 450 |
|                                                              | L60_(Portugal-1960)                                |              |             |              |             | I            |              | .E           | R            |              | 450 |
|                                                              | Benin_97/1_(Benin-1997)                            |              |             |              |             | I            |              | .E           | R            |              | 450 |
|                                                              | E75_(Spain-1975)                                   |              |             |              |             | I            |              | .E           | R            |              | 450 |
|                                                              | OURT_88/3_(Portugal-1988)                          |              |             |              |             | I            |              | .E           | R            |              | 450 |
|                                                              | NHV_(Portugal-1968)                                |              |             |              |             | I            |              | .E           | R            |              | 450 |
|                                                              | Mkuzi_1979_(South Africa: Mkuzi Game Reserve-1979) |              |             | .V           |             | I            |              | .E           | R            |              | 450 |
|                                                              | Warthog_(Namibia-1980)                             |              |             | .V           | .Y          |              |              |              | .R           |              | 450 |
| Pretorisuskop/96/4_(South Africa: Kruger National Park-1996) |                                                    |              |             | .V           | .Y          |              |              |              | .R           |              | 450 |
|                                                              | Warmbaths_(South Africa: Warmbaths-1987)           |              |             | .V           | .Y          |              | .I           |              | .R           |              | 450 |
|                                                              | Tengani_62_(Malawi: Tengani-1962)                  |              |             |              | .Y          |              |              |              |              |              | 450 |
|                                                              | Malawi_Lil-20/1_(Malawi: Chalaswa-1983)            |              |             | .L           |             | .H           |              |              |              |              | 450 |
|                                                              | Ken05/Tk1_(Kenya-2005)                             | T            | .S          | K .Y         | .D          | .Q           | .T           | D .ISH .F    | L .C .E      | .AS          | 450 |
|                                                              | Kenya_1950_(Kenya-1950)                            | T            | .S          | K .Y         | .D          | .Q           | .T           | D .ISH .F    | L .C .E      | .AS          | 450 |
|                                                              | Ken06.Bus_(Kenya-2006)                             | T            | .S          | K .Y         | .D          | .Q           | .T           | D .ISH .F    | L .K C .E    | .AS          | 450 |
|                                                              | Conservation                                       |              |             |              |             |              |              |              |              |              |     |
|                                                              | Ghana2022-34&35_MGF_505-11L                        | TKFKKAC YAA  | NMSDQKV KRA | L IKCLF IASQ | KNYCQ IFKYC | FGSL LKVL SK | HERVKFFNSV   | VFAKKLASYY   | DHQNM IHL ID | SL IERFRYL I | 540 |
|                                                              | Ghana2022-40&62                                    |              |             |              |             |              |              |              |              |              | 540 |
|                                                              | ASFV-G_(Georgia-2007)                              |              |             |              |             |              |              |              |              |              | 540 |
|                                                              | L60_(Portugal-1960)                                |              |             |              |             |              |              |              |              |              | 540 |
|                                                              | Benin_97/1_(Benin-1997)                            |              |             |              |             |              |              |              |              |              | 540 |
|                                                              | E75_(Spain-1975)                                   |              |             |              |             |              |              |              |              |              | 540 |
|                                                              | OURT_88/3_(Portugal-1988)                          |              |             |              |             |              |              |              |              | .C           | 540 |
|                                                              | NHV_(Portugal-1968)                                |              |             |              |             |              |              |              |              | .C           | 540 |
|                                                              | Mkuzi_1979_(South Africa: Mkuzi Game Reserve-1979) |              |             |              |             |              |              |              |              |              | 540 |
|                                                              | Warthog_(Namibia-1980)                             | .T           |             |              |             |              |              |              |              |              | 540 |
| Pretorisuskop/96/4_(South Africa: Kruger National Park-1996) |                                                    | .T           | .N          |              |             |              |              |              |              |              | 540 |
|                                                              | Warmbaths_(South Africa: Warmbaths-1987)           | .T           |             |              |             |              |              |              |              | .K           | 540 |
|                                                              | Tengani_62_(Malawi: Tengani-1962)                  | .T           | .VV         |              |             |              |              |              |              |              | 540 |
|                                                              | Malawi_Lil-20/1_(Malawi: Chalaswa-1983)            | .T           |             | .T           |             |              | .QE          |              | .Q           | .L           | 540 |
|                                                              | Ken05/Tk1_(Kenya-2005)                             |              | .Q          | .A           | .C          |              | .QN          | .A           | .R           | .D           | 540 |
|                                                              | Kenya_1950_(Kenya-1950)                            |              | .Q          | .A           | .C          |              | .N           | .A           | .R           | .D           | 540 |
|                                                              | Ken06.Bus_(Kenya-2006)                             |              | .Q          | .A           | .C          |              | .R           | .N           | .A           | .R           | 540 |
|                                                              | Conservation                                       |              |             |              |             |              |              |              |              |              |     |
|                                                              | Ghana2022-34&35_MGF_505-11L                        | KD *         | 543         |              |             |              |              |              |              |              |     |
|                                                              | Ghana2022-40&62                                    | . . .        | 543         |              |             |              |              |              |              |              |     |
|                                                              | ASFV-G_(Georgia-2007)                              | . . .        | 543         |              |             |              |              |              |              |              |     |
|                                                              | L60_(Portugal-1960)                                | . . .        | 543         |              |             |              |              |              |              |              |     |
|                                                              | Benin_97/1_(Benin-1997)                            | . . .        | 543         |              |             |              |              |              |              |              |     |
|                                                              | E75_(Spain-1975)                                   | . . .        | 543         |              |             |              |              |              |              |              |     |
|                                                              | OURT_88/3_(Portugal-1988)                          | . . .        | 543         |              |             |              |              |              |              |              |     |
|                                                              | NHV_(Portugal-1968)                                | . . .        | 543         |              |             |              |              |              |              |              |     |
|                                                              | Mkuzi_1979_(South Africa: Mkuzi Game Reserve-1979) | . . .        | 543         |              |             |              |              |              |              |              |     |
|                                                              | Warthog_(Namibia-1980)                             | . . .        | 543         |              |             |              |              |              |              |              |     |
| Pretorisuskop/96/4_(South Africa: Kruger National Park-1996) |                                                    | . . .        | 543         |              |             |              |              |              |              |              |     |
|                                                              | Warmbaths_(South Africa: Warmbaths-1987)           | . . .        | 543         |              |             |              |              |              |              |              |     |
|                                                              | Tengani_62_(Malawi: Tengani-1962)                  | . . .        | 543         |              |             |              |              |              |              |              |     |
|                                                              | Malawi_Lil-20/1_(Malawi: Chalaswa-1983)            | .A .         | 543         |              |             |              |              |              |              |              |     |
|                                                              | Ken05/Tk1_(Kenya-2005)                             | . . .        | 543         |              |             |              |              |              |              |              |     |
|                                                              | Kenya_1950_(Kenya-1950)                            | . . .        | 543         |              |             |              |              |              |              |              |     |
|                                                              | Ken06.Bus_(Kenya-2006)                             | . . .        | 543         |              |             |              |              |              |              |              |     |
|                                                              | Conservation                                       |              |             |              |             |              |              |              |              |              |     |

[illegible]

|                                                              |                                                    | 20                  |                     |               |       |                     |                       |                     |                       |                     |           | 40 |  |  |  |  |  |  |  |  |  | 60 |  |  |  |  |  |  |  |  |  | 80 |  |  |  |  |  |  |  |  |  |  |
|--------------------------------------------------------------|----------------------------------------------------|---------------------|---------------------|---------------|-------|---------------------|-----------------------|---------------------|-----------------------|---------------------|-----------|----|--|--|--|--|--|--|--|--|--|----|--|--|--|--|--|--|--|--|--|----|--|--|--|--|--|--|--|--|--|--|
|                                                              |                                                    |                     |                     |               |       |                     |                       |                     |                       |                     |           |    |  |  |  |  |  |  |  |  |  |    |  |  |  |  |  |  |  |  |  |    |  |  |  |  |  |  |  |  |  |  |
|                                                              | Ghana2022-34&35_X69R                               | - - - - -           | - - M L L Y I V I I | V A C I I S K | P V P | - N E Y W A I H L F | F I I M I F M V Y M   | Y E K L D I H Q K S | Q F W N Y T M S G L   | S G H N V Q - V T C | K C Y * - | 70 |  |  |  |  |  |  |  |  |  |    |  |  |  |  |  |  |  |  |  |    |  |  |  |  |  |  |  |  |  |  |
|                                                              | ASFV-G_(Georgia-2007)                              | - - - - -           | - - . . . . .       | . . . . .     | L . . | - . . . . .         | . . . . .             | . . . . .           | . . . . .             | . . . . .           | . . . . . | 70 |  |  |  |  |  |  |  |  |  |    |  |  |  |  |  |  |  |  |  |    |  |  |  |  |  |  |  |  |  |  |
|                                                              | L60_(Portugal-1960)                                | - - - - -           | - - . . . . .       | . . . . .     | L . . | - . . . . .         | . . . . .             | . . . . . Y         | . . . . .             | . . . . .           | . . . . . | 70 |  |  |  |  |  |  |  |  |  |    |  |  |  |  |  |  |  |  |  |    |  |  |  |  |  |  |  |  |  |  |
|                                                              | BA71V_(Spain-1971)                                 | - - - - -           | - - . . . . .       | . . . . .     | L . . | - . . . . .         | . . . . .             | . . . . . Y         | . . . . .             | . . . . .           | . . . . . | 70 |  |  |  |  |  |  |  |  |  |    |  |  |  |  |  |  |  |  |  |    |  |  |  |  |  |  |  |  |  |  |
|                                                              | Benin_97/1_(Benin-1997)                            | - - - - -           | - - . . . . .       | . . . . .     | L . . | - . . . . .         | . . . . .             | . . . . . Y         | . . . . .             | . . . . .           | . . . . . | 70 |  |  |  |  |  |  |  |  |  |    |  |  |  |  |  |  |  |  |  |    |  |  |  |  |  |  |  |  |  |  |
|                                                              | E75_(Spain-1975)                                   | - - - - -           | - - . . . . .       | . . . . .     | L . . | - . . . . .         | . . . . .             | . . . . . Y         | . . . . .             | . . . . .           | . . . . . | 70 |  |  |  |  |  |  |  |  |  |    |  |  |  |  |  |  |  |  |  |    |  |  |  |  |  |  |  |  |  |  |
|                                                              | OURT_88/3_(Portugal-1988)                          | - - - - -           | - - . . . . .       | . . . . .     | L . . | - . . . . .         | . . . . .             | . . . . . Y         | . . . . .             | . . . . .           | . . . . . | 70 |  |  |  |  |  |  |  |  |  |    |  |  |  |  |  |  |  |  |  |    |  |  |  |  |  |  |  |  |  |  |
|                                                              | NHV_(Portugal-1968)                                | - - - - -           | - - . . . . .       | . . . . .     | L . . | - . . . . .         | . . . . .             | . . . . . Y         | . . . . .             | . . . . .           | . . . . . | 70 |  |  |  |  |  |  |  |  |  |    |  |  |  |  |  |  |  |  |  |    |  |  |  |  |  |  |  |  |  |  |
|                                                              | Warthog_(Namibia-1980)                             | - - - - -           | - - . . . . .       | . . . . .     | L . . | - . . . . .         | . . . . .             | . . . . . Y         | . . . . .             | . . . . .           | . . . . . | 70 |  |  |  |  |  |  |  |  |  |    |  |  |  |  |  |  |  |  |  |    |  |  |  |  |  |  |  |  |  |  |
|                                                              | Mkuzi_1979_(South_Africa:_Mkuzi_Game_Reserve-1979) | - - - - -           | - - . . . . .       | . . . . .     | L . . | - . . . . .         | . . . . .             | . . . . . Y         | . . . . .             | . . . . .           | . . . . . | 70 |  |  |  |  |  |  |  |  |  |    |  |  |  |  |  |  |  |  |  |    |  |  |  |  |  |  |  |  |  |  |
|                                                              | Tengani_62_(Malawi:_Tengani-1962)                  | - - - - -           | - - . . . . .       | . . . . .     | L . . | - . . . . .         | . . . . .             | . . . . . N         | . . . . .             | . . . . .           | . . . . . | 70 |  |  |  |  |  |  |  |  |  |    |  |  |  |  |  |  |  |  |  |    |  |  |  |  |  |  |  |  |  |  |
|                                                              | Malawi_Lil-20/1_(Malawi:_Chalaswa-1983)            | M I K H C K K K E R | I I . . . . .       | . . . . .     | L . . | - . . . . .         | . . . . .             | . K . . . . . Y     | . . . . .             | . . . . .           | . . . . . | 82 |  |  |  |  |  |  |  |  |  |    |  |  |  |  |  |  |  |  |  |    |  |  |  |  |  |  |  |  |  |  |
| Pretorisuskop/96/4_(South_Africa:_Kruger_National_Park-1996) |                                                    | - - - - -           | - - . . . . .       | . . . . . F I | L . . | - . . . . .         | . . . . .             | . . . . . V . . . Y | . . . . .             | . . . . .           | . . . . . | 70 |  |  |  |  |  |  |  |  |  |    |  |  |  |  |  |  |  |  |  |    |  |  |  |  |  |  |  |  |  |  |
|                                                              | Warmbaths_(South_Africa:_Warmbaths-1987)           | - - - - -           | - - . . . . .       | . . . . .     | L . . | - . . . . .         | . . . . . S . . . . . | . . . . . V . . . Y | . . . . .             | . . . . .           | . . . . . | 70 |  |  |  |  |  |  |  |  |  |    |  |  |  |  |  |  |  |  |  |    |  |  |  |  |  |  |  |  |  |  |
|                                                              | Ken06.Bus_(Kenya-2006)                             | - - - - -           | - M L . . . T . M . | L T . . . Y   | L . . | D . K . . P . . M . | . F . I V Y I . . .   | . . . . . E . .     | . . . . . H . . A R . | . . C P . P T I I . | N . * - - | 72 |  |  |  |  |  |  |  |  |  |    |  |  |  |  |  |  |  |  |  |    |  |  |  |  |  |  |  |  |  |  |
|                                                              | Kenya_1950_(Kenya-1950)                            | - - - - -           | - M L . . . T . M . | L T . . . Y   | L . . | D . K . . P . . M . | . F . . . Y I . . .   | . . . . . E . .     | . . . . . A R .       | . . . P . P T I I . | N . * - - | 72 |  |  |  |  |  |  |  |  |  |    |  |  |  |  |  |  |  |  |  |    |  |  |  |  |  |  |  |  |  |  |
|                                                              | Ken05/Tk1_(Kenya-2005)                             | - - - - -           | - M L . T . T . . . | L T . . F Y   | L A . | D - K . . P . Y M . | . . . . . Y I . H .   | . . . . . E . .     | . . . . . D . . A R . | . . R P . P A L M . | . . F Y * | 73 |  |  |  |  |  |  |  |  |  |    |  |  |  |  |  |  |  |  |  |    |  |  |  |  |  |  |  |  |  |  |
| Conservation                                                 |                                                    |                     |                     |               |       |                     |                       |                     |                       |                     |           |    |  |  |  |  |  |  |  |  |  |    |  |  |  |  |  |  |  |  |  |    |  |  |  |  |  |  |  |  |  |  |
